# Supplementary material for: Iron-catalyzed hydroarylation of 1,3-dienes with indoles
Source: Royal Society of Chemistry journal article supplement (doi:10.1039/d2qo01653b), 2022-12-06

*Supporting information*

## **Iron-Catalyzed Hydroarylation of 1,3-Dienes with Indoles**

Jie Huang, Ling-Ling Chen, Tong-Mei Ding\*, Zhi-Min Chen\*

School of Chemistry and Chemical Engineering, Shanghai Key Laboratory for Molecular Engineering of Chiral Drugs, Shanghai Jiao Tong University, Shanghai 200240, P. R. China  
Email: chenzhimin221@sjtu.edu.cn

### **Table of Contents**

|                                                                                    |     |
|------------------------------------------------------------------------------------|-----|
| 1. General information                                                             | S2  |
| 2. The preparation of substrates                                                   | S3  |
| 3. Screening of reaction conditions                                                | S4  |
| 4. General procedure for iron-catalyzed hydroarylation of 1,3-dienes with indoles  | S5  |
| 5. Gram-scale reaction and mechanistic study                                       | S27 |
| References                                                                         | S30 |
| Copies of <sup>1</sup> H NMR, <sup>13</sup> C NMR, and <sup>19</sup> F NMR spectra | S31 |

## 1. General information

Unless otherwise noted, all reactions were carried out under an atmosphere of argon, using over-dried or flame-dried glassware equipped with a magnetic stir bar. All chemicals were purchased from commercial suppliers and used without further purification. In addition to commercially available extra dry solvents, all solvents were purified by standard operating method. Toluene was distilled from sodium, Tetrahydrofuran (THF) was distilled from sodium and acetonitrile (MeCN) was purchased from commercial suppliers (*J&K Technology*) and used without further purification. PhCl was purchased from Energy Chemical. Thin-layer chromatography was performed with EMD silica gel 60 F<sub>254</sub> plates eluting with solvents indicated, visualized by a 254 nm UV lamp and stained with phosphomolybdic acid (PMA). **<sup>1</sup>H NMR**, **<sup>13</sup>C NMR** and **<sup>19</sup>F NMR** spectra were obtained on Bruker AM-400 and Bruker AM-500. Chemical shifts ( $\delta$ ) were quoted in ppm relative to tetramethylsilane or deuterated solvent as internal standard (TMS: 0 ppm for **<sup>1</sup>H NMR** CDCl<sub>3</sub>; 77.16 ppm for **<sup>13</sup>C NMR**), multiplicities are as indicated: s = singlet, d = doublet, t = triplet, q = quartet, m = multiplet. High-resolution mass spectral analysis (**HRMS**) data were measured on a Bruker impact II (Q-TOF) mass spectrum by means of the ESI technique.

## 2. The preparation of substrates

2.1 All of the used 1,3-dienes are known compounds. Compounds **1a-1r** and **1u** were prepared according to reported literature.<sup>1</sup> **1s** and **1t** were purchased from Heowns.

(Figure S1).

Figure S1 Substrate scope of 1,3-dienes

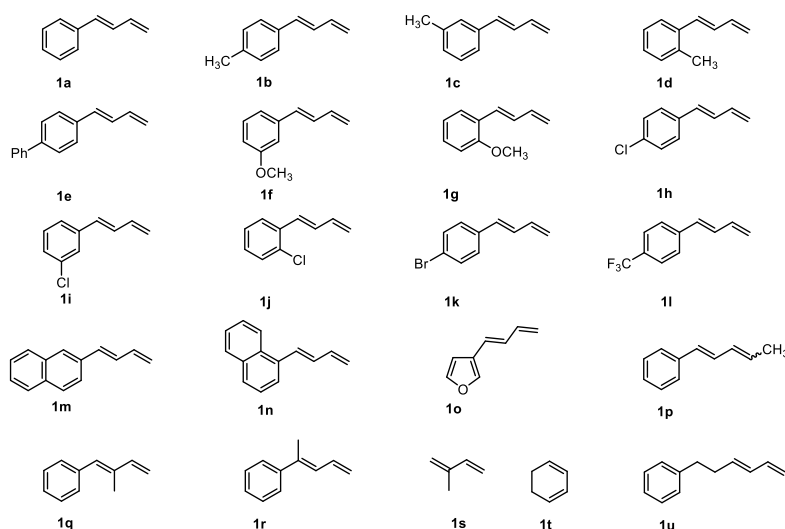

2.2 All of the used indoles are known compounds. Compounds **2a-2q**, **2t**<sup>2a-2e</sup>, **2r**<sup>2f</sup> and **2s**<sup>2h</sup> were prepared according to reported literature. **2u** were purchased from Energy Chemical. **2v** was purchased from Bidepharm. (Figure S2).

Figure S2. Substrate scope of known indoles.

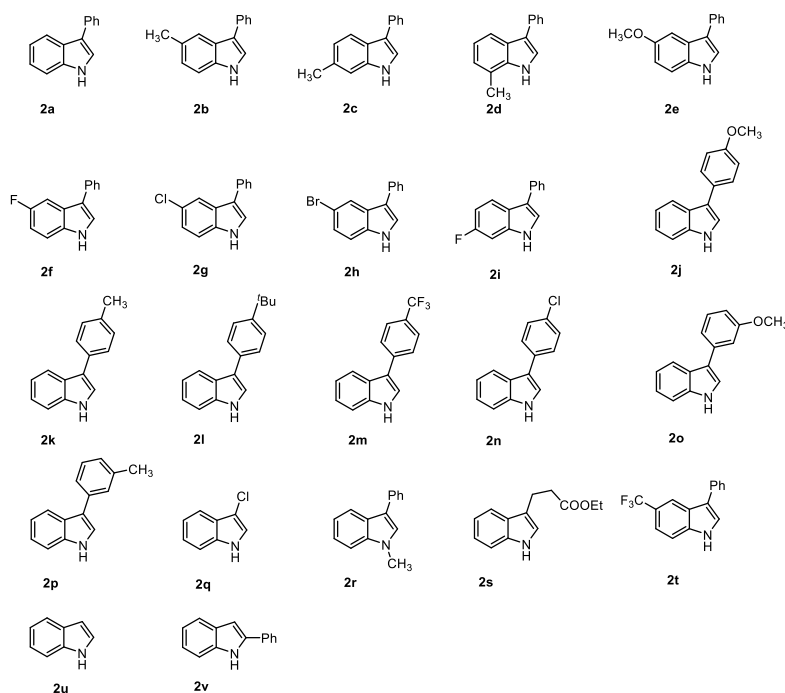

### 3. Screening of reaction conditions<sup>a</sup>

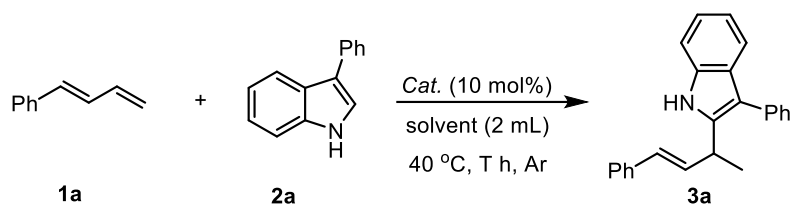

| Entry           | Cat.                    | Solvent            | T (h)    | Yield (%) <sup>b</sup> |
|-----------------|-------------------------|--------------------|----------|------------------------|
| 1               | FeBr <sub>3</sub>       | PhCH <sub>3</sub>  | 24       | 67                     |
| 2               | FeCl <sub>3</sub>       | PhCH <sub>3</sub>  | 24       | trace                  |
| 3               | FeCl <sub>2</sub>       | PhCH <sub>3</sub>  | 24       | no                     |
| 4               | Fe(OAc) <sub>2</sub>    | PhCH <sub>3</sub>  | 24       | no                     |
| 5               | InBr <sub>3</sub>       | PhCH <sub>3</sub>  | 24       | 16                     |
| 6               | GaCl <sub>3</sub>       | PhCH <sub>3</sub>  | 24       | 37                     |
| 7               | ZnBr <sub>2</sub>       | PhCH <sub>3</sub>  | 24       | no                     |
| 8               | AlCl <sub>3</sub>       | PhCH <sub>3</sub>  | 24       | trace                  |
| 9               | Sc(OTf) <sub>3</sub>    | PhCH <sub>3</sub>  | 24       | trace                  |
| 10              | Cu(OTf) <sub>2</sub>    | PhCH <sub>3</sub>  | 24       | trace                  |
| 11              | Ni(OTf) <sub>2</sub>    | PhCH <sub>3</sub>  | 24       | no                     |
| 12              | CoCl <sub>2</sub>       | PhCH <sub>3</sub>  | 24       | no                     |
| 13              | FeBr <sub>3</sub>       | PhCF <sub>3</sub>  | 24       | 74                     |
| 14              | FeBr <sub>3</sub>       | PhCl               | 24       | 82                     |
| 15              | FeBr <sub>3</sub>       | EA                 | 24       | no                     |
| 16              | FeBr <sub>3</sub>       | CH <sub>3</sub> CN | 24       | no                     |
| 17              | FeBr <sub>3</sub>       | 1,4-dioxane        | 24       | trace                  |
| 18              | FeBr <sub>3</sub>       | THF                | 24       | no                     |
| 19              | FeBr <sub>3</sub>       | DCM                | 24       | no                     |
| 20 <sup>c</sup> | FeBr <sub>3</sub>       | PhCl               | 24       | 48                     |
| 21 <sup>d</sup> | FeBr <sub>3</sub>       | PhCl               | 24       | 57                     |
| <b>22</b>       | <b>FeBr<sub>3</sub></b> | <b>PhCl</b>        | <b>3</b> | <b>80</b>              |
| 23              | FeBr <sub>3</sub>       | PhCl               | 6        | 81                     |

<sup>a</sup>Reactions conditions: unless stated otherwise, 1-phenyl-1,3-butadiene **1a** (19.6 mg, 0.075 mmol, 1.5 equiv), 3-phenylindole **2a** (19.4 mg, 0.05 mmol, 1.0 equiv) in PhCl (2 mL) at 40 °C under argon. <sup>b</sup>Isolated yield. <sup>c</sup>5 mol% FeBr<sub>3</sub> was used. <sup>d</sup>1.2 equiv **1a** was used.

#### 4. General procedure for iron-catalyzed hydroarylation of 1,3-dienes with indoles

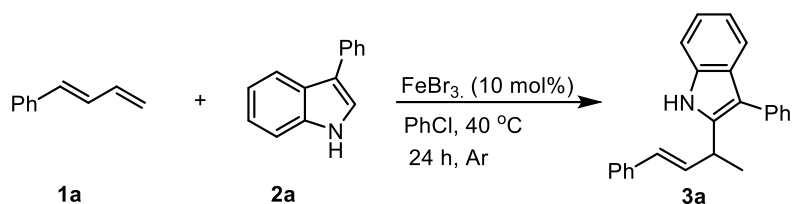

In Ar-filled glove box, the FeBr<sub>3</sub> (3.0 mg, 0.01 mmol, 0.1 equiv) was added to the oven-dried reaction tube with a dried stir bar. The tube was capped, then it was transferred out of the glovebox. indole **2** (0.10 mmol, 1.0 equiv) was added to this oven-dried reaction tube, 1,3-diene **1** (0.15 mmol, 1.5 equiv) was added with PhCl (2 mL). (If 1,3-diene **1** is solid, adding it directly to the reaction tube). After all reagents were added, the reaction tube was replaced with argon three times, and then sealed. The reaction mixture was stirred in a 40 °C oil bath under argon for 3-28 h (monitored by TLC). After the reaction was completed, the solvent was removed under vacuum, and the residue was purified by column chromatography on silica gel with a gradient eluent of petroleum ether (PE)/ethyl acetate (EA) to give the desired product **3**.

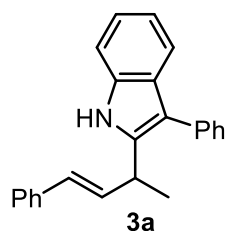

The reaction of **1a** (19.6 mg, 0.15 mmol) and **2a** (19.4 mg, 0.10 mmol) was stirred in a 40 °C oil bath under argon for 3 h. Compound **3a** was isolated by flash column chromatography (SiO<sub>2</sub>, PE/EA = 80:1, v/v) in 80% yield (25.9 mg) as yellow solid, *R<sub>f</sub>* = 0.55 (silica gel, PE/EA = 15:1). <sup>1</sup>H NMR (CDCl<sub>3</sub>, 400 MHz, ppm) δ 7.89 (s, 1H), 7.65 (d, *J* = 7.6 Hz, 1H), 7.53 (d, *J* = 7.6 Hz, 2H), 7.43 (t, *J* = 7.6 Hz, 2H), 7.35 – 7.21 (m, 6H), 7.21 – 7.13 (m, 2H), 7.13 – 7.05 (m, 1H), 6.47 – 6.32 (m, 2H), 4.23 – 4.01 (m, 1H), 1.45 (d, *J* = 7.2 Hz, 3H). <sup>13</sup>C NMR (CDCl<sub>3</sub>, 101 MHz, ppm) δ 137.8, 137.1, 135.4, 135.3, 132.9, 129.8, 129.7, 128.7, 128.7, 128.0, 127.6, 126.3, 126.3, 122.0, 120.1, 119.3, 114.5, 110.8, 33.5, 20.3. HRMS (ESI) *m/z*: [M+Na]<sup>+</sup> calcd for C<sub>24</sub>H<sub>21</sub>NNa: 346.1566. Found 346.1563.

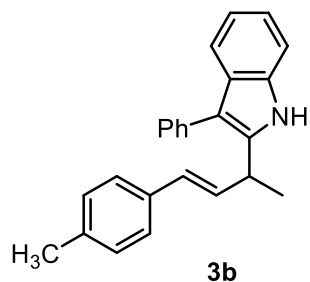

The reaction of **1b** (21.6 mg, 0.15 mmol) and **2a** (19.4 mg, 0.10 mmol) was stirred in a 40 °C oil bath under argon for 3 h. Compound **3b** was isolated by flash column chromatography (SiO<sub>2</sub>, PE/EA = 80:1, v/v) in 64% yield (21.5 mg) as yellow oil, *R<sub>f</sub>* = 0.54 (silica gel, PE/EA = 15:1). **<sup>1</sup>H NMR** (CDCl<sub>3</sub>, 400 MHz, ppm) δ 8.02 (s, 1H), 7.65 (d, *J* = 8.0 Hz, 1H), 7.54 (d, *J* = 7.2 Hz, 2H), 7.50 – 7.43 (m, 2H), 7.37 – 7.30 (m, 2H), 7.27 – 7.23 (m, 2H), 7.22 – 7.16 (m, 1H), 7.15 – 7.09 (m, 3H), 6.51 – 6.34 (m, 2H), 4.22 – 4.04 (m, 1H), 2.32 (s, 3H), 1.52 (d, *J* = 7.2 Hz, 3H). **<sup>13</sup>C NMR** (CDCl<sub>3</sub>, 101 MHz, ppm) δ 138.0, 137.4, 135.5, 135.3, 134.3, 131.9, 129.9, 129.6, 129.4, 128.7, 128.0, 126.3, 126.3, 122.0, 120.1, 119.3, 114.5, 110.8, 33.5, 21.3, 20.4. **HRMS** (ESI) *m/z*: [M+Na]<sup>+</sup> calcd for C<sub>25</sub>H<sub>23</sub>NNa: 360.1723. Found 360.1722.

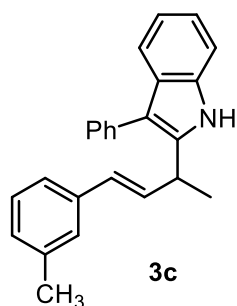

The reaction of **1c** (21.6 mg, 0.15 mmol) and **2a** (19.4 mg, 0.10 mmol) was stirred in a 40 °C oil bath under argon for 3 h. Compound **3c** was isolated by flash column chromatography (SiO<sub>2</sub>, PE/EA = 80:1~50:1, v/v) in 84% yield (28.2 mg) as white solid, *R<sub>f</sub>* = 0.56 (silica gel, PE/EA = 15:1). **<sup>1</sup>H NMR** (CDCl<sub>3</sub>, 400 MHz, ppm) δ 8.01 (s, 1H), 7.65 (d, *J* = 7.6 Hz, 1H), 7.53 (d, *J* = 8.0 Hz, 2H), 7.49 – 7.41 (m, 2H), 7.37 – 7.29 (m, 2H), 7.25 – 7.09 (m, 5H), 7.03 (d, *J* = 7.2 Hz, 1H), 6.56 – 6.30 (m, 2H), 4.21 – 4.04 (m, 1H), 2.31 (s, 3H), 1.52 (d, *J* = 7.2 Hz, 3H). **<sup>13</sup>C NMR** (CDCl<sub>3</sub>, 101 MHz, ppm) δ 138.3, 137.9, 137.1, 135.5, 135.3, 132.7, 129.9, 129.8, 128.7, 128.7, 128.4, 128.0, 127.1, 126.3, 123.5, 122.0, 120.1, 119.3, 114.5, 110.8, 33.5, 21.5, 20.4. **HRMS** (ESI) *m/z*: [M+Na]<sup>+</sup> calcd for C<sub>25</sub>H<sub>23</sub>NNa: 360.1723. Found 360.1727.

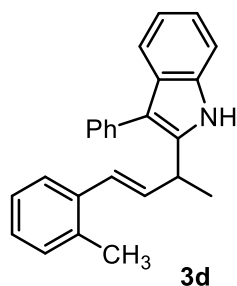

The reaction of **1d** (21.6 mg, 0.15 mmol) and **2a** (19.4 mg, 0.10 mmol) was stirred in a 40 °C oil bath under argon for 3 h. Compound **3d** was isolated by flash column chromatography (SiO<sub>2</sub>, PE/EA = 80:1, v/v) in 95% yield (32.1 mg) as yellow solid, *R<sub>f</sub>* = 0.49 (silica gel, PE/EA = 15:1). <sup>1</sup>H NMR (CDCl<sub>3</sub>, 400 MHz, ppm) δ 8.04 (s, 1H), 7.65 (d, *J* = 8.0 Hz, 1H), 7.57 – 7.53 (m, 2H), 7.51 – 7.44 (m, 2H), 7.43 – 7.30 (m, 3H), 7.27 – 7.18 (m, 1H), 7.17 – 7.09 (m, 4H), 6.66 (dd, *J* = 15.6, 1.6 Hz, 1H), 6.32 (dd, *J* = 16.0, 5.6 Hz, 1H), 4.27 – 4.11 (m, 1H), 2.29 (s, 3H), 1.54 (d, *J* = 6.8, 3H). <sup>13</sup>C NMR (CDCl<sub>3</sub>, 101 MHz, ppm) δ 137.9, 136.3, 135.4, 135.4, 135.3, 134.3, 130.4, 129.9, 128.7, 128.1, 127.7, 127.5, 126.3, 126.3, 125.7, 122.0, 120.1, 119.3, 114.5, 110.7, 34.0, 20.4, 20.0. HRMS (ESI) *m/z*: [M+Na]<sup>+</sup> calcd for C<sub>25</sub>H<sub>23</sub>NNa: 360.1723. Found 360.1724.

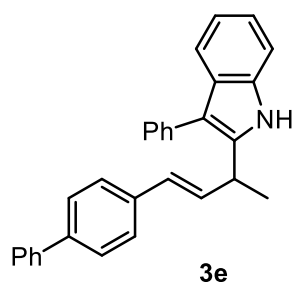

The reaction of **1e** (30.9 mg, 0.15 mmol) and **2a** (19.4 mg, 0.10 mmol) was stirred in a 40 °C oil bath under argon for 3 h. Compound **3e** was isolated by flash column chromatography (SiO<sub>2</sub>, PE/EA = 80:1, v/v) in 77% yield (30.7 mg) as yellow oil, *R<sub>f</sub>* = 0.35 (silica gel, PE/EA = 15:1). <sup>1</sup>H NMR (CDCl<sub>3</sub>, 400 MHz, ppm) δ 8.03 (s, 1H), 7.67 (d, *J* = 7.6 Hz, 1H), 7.62 – 7.51 (m, 6H), 7.50 – 7.38 (m, 6H), 7.37 – 7.28 (m, 3H), 7.23 – 7.17 (m, 1H), 7.15 – 7.10 (m, 1H), 6.51 (dd, *J* = 16.4, 4.4 Hz, 1H), 6.44 (d, *J* = 16.4 Hz, 1H), 4.29 – 3.97 (m, 1H), 1.53 (d, *J* = 7.2 Hz, 3H). <sup>13</sup>C NMR (CDCl<sub>3</sub>, 101 MHz, ppm) δ 140.8, 140.4, 137.7, 136.1, 135.5, 135.3, 133.1, 129.9, 129.3, 128.9,

128.7, 128.0, 127.4, 127.4, 127.0, 126.8, 126.3, 122.0, 120.1, 119.3, 114.6, 110.8, 33.6, 20.4. **HRMS** (ESI)  $m/z$ :  $[M+Na]^+$  calcd for  $C_{30}H_{25}NNa$ : 422.1879. Found 422.1877.

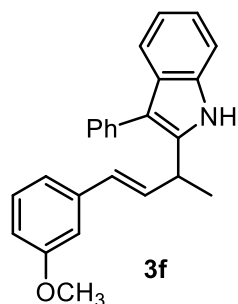

The reaction of **1f** (24.0 mg, 0.15 mmol) and **2a** (19.4 mg, 0.10 mmol) was stirred in a 40 °C oil bath under argon for 6 h. Compound **3f** was isolated by flash column chromatography ( $SiO_2$ , PE/EA = 80:1~50:1, v/v) in 79% yield (27.6 mg) as yellow solid,  $R_f = 0.44$  (silica gel, PE/EA = 15:1).  **$^1H$  NMR** ( $CDCl_3$ , 400 MHz, ppm)  $\delta$  8.05 (s, 1H), 7.66 (d,  $J = 8.0$  Hz, 1H), 7.53 (d,  $J = 7.2$  Hz, 2H), 7.50 – 7.43 (m, 2H), 7.36 – 7.30 (m, 2H), 7.26 – 7.16 (m, 2H), 7.15 – 7.08 (m, 1H), 6.94 (d,  $J = 7.6$  Hz, 1H), 6.88 (s, 1H), 6.78 (dd,  $J = 8.4, 2.4$  Hz, 1H), 6.47 (dd,  $J = 16.0, 4.8$  Hz, 1H), 6.39 (d,  $J = 16.8$  Hz, 1H), 4.21 – 4.06 (m, 1H), 3.78 (s, 3H), 1.53 (d,  $J = 7.2$  Hz, 3H).  **$^{13}C$  NMR** ( $CDCl_3$ , 101 MHz, ppm)  $\delta$  160.0, 138.6, 137.7, 135.5, 135.2, 133.3, 129.8, 129.7, 129.7, 128.7, 128.0, 126.3, 122.0, 120.1, 119.3, 119.0, 114.6, 113.5, 111.5, 110.8, 55.4, 33.5, 20.3. **HRMS** (ESI)  $m/z$ :  $[M+Na]^+$  calcd for  $C_{25}H_{23}NONa$ : 376.1672. Found 376.1671.

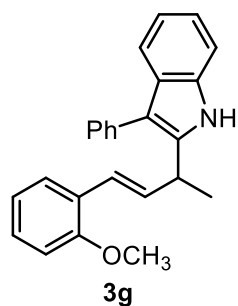

The reaction of **1g** (24.0 mg, 0.15 mmol) and **2a** (19.4 mg, 0.10 mmol) was stirred in a 40 °C oil bath under argon for 3 h. Compound **3g** was isolated by flash column



chromatography (SiO<sub>2</sub>, PE/EA = 80:1~40:1, v/v) in 69% yield (24.1 mg) as white solid,  $R_f = 0.30$  (silica gel, PE/EA = 15:1). **<sup>1</sup>H NMR** (CDCl<sub>3</sub>, 400 MHz, ppm)  $\delta$  8.08 (s, 1H), 7.64 (d,  $J = 7.9$  Hz, 1H), 7.55 (d,  $J = 8.0$  Hz, 2H), 7.51 – 7.44 (m, 2H), 7.39 (d,  $J = 8.0$  Hz, 1H), 7.36 – 7.29 (m, 2H), 7.24 – 7.15 (m, 2H), 7.14 – 7.08 (m, 1H), 6.90 (m, 1H), 6.88 – 6.80 (m, 2H), 6.47 (dd,  $J = 16.4, 5.6$  Hz, 1H), 4.29 – 4.08 (m, 1H), 3.83 (s, 3H), 1.54 (d,  $J = 6.8$  Hz, 3H). **<sup>13</sup>C NMR** (CDCl<sub>3</sub>, 101 MHz, ppm)  $\delta$  156.7, 138.3, 135.5, 135.4, 133.4, 129.9, 128.6, 128.6, 128.1, 126.8, 126.2, 124.5, 121.9, 120.8, 120.0, 119.3, 114.3, 111.0, 110.8, 55.6, 33.9, 20.4. **HRMS** (ESI)  $m/z$ :  $[M+Na]^+$  calcd for C<sub>25</sub>H<sub>23</sub>NONa: 376.1672. Found 376.1673.

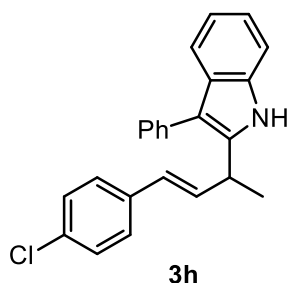

The reaction of **1h** (24.7 mg, 0.15 mmol) and **2a** (19.4 mg, 0.10 mmol) was stirred in a 40 °C oil bath under argon for 3 h. Compound **3h** was isolated by flash column chromatography (SiO<sub>2</sub>, PE/EA = 80:1, v/v) in 59% yield (20.9 mg) as yellow oil,  $R_f = 0.49$  (silica gel, PE/EA = 15:1). **<sup>1</sup>H NMR** (CDCl<sub>3</sub>, 400 MHz, ppm)  $\delta$  8.00 (s, 1H), 7.65 (d,  $J = 8.0$  Hz, 1H), 7.55 – 7.50 (m, 2H), 7.46 (t,  $J = 7.2$  Hz, 2H), 7.38 – 7.29 (m, 2H), 7.25 (s, 4H), 7.22 – 7.17 (m, 1H), 7.15 – 7.08 (m, 1H), 6.43 (dd,  $J = 16.0, 4.8$  Hz, 1H), 6.34 (dd,  $J = 16.0, 1.6$  Hz, 1H), 4.17 – 4.08 (m, 1H), 1.52 (d,  $J = 7.2$  Hz, 3H). **<sup>13</sup>C NMR** (CDCl<sub>3</sub>, 101 MHz, ppm)  $\delta$  137.5, 135.7, 135.5, 135.2, 133.7, 133.2, 129.9, 128.9, 128.7, 128.6, 128.0, 127.6, 126.4, 122.1, 120.2, 119.4, 114.8, 110.8, 33.6, 20.3. **HRMS** (ESI)  $m/z$ :  $[M+Na]^+$  calcd for C<sub>24</sub>H<sub>20</sub>ClNNa: 380.1176. Found 380.1179.

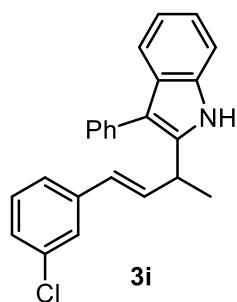

The reaction of **1i** (24.7 mg, 0.15 mmol) and **2a** (19.4 mg, 0.10 mmol) was stirred in a 40 °C oil bath under argon for 28 h. Compound **3i** was isolated by flash column chromatography (SiO<sub>2</sub>, PE/EA = 80:1, v/v) in 63% yield (22.2 mg) as yellow oil, *R<sub>f</sub>* = 0.44 (silica gel, PE/EA = 15:1). **<sup>1</sup>H NMR** (CDCl<sub>3</sub>, 400 MHz, ppm) δ 8.00 (s, 1H), 7.65 (d, *J* = 7.6 Hz, 1H), 7.55 – 7.50 (m, 2H), 7.50 – 7.43 (m, 2H), 7.38 – 7.30 (m, 3H), 7.26 – 7.16 (m, 4H), 7.15 – 7.07 (m, 1H), 6.48 (dd, *J* = 16.0, 4.8 Hz, 1H), 6.34 (dd, *J* = 16.0, 2.0 Hz, 1H), 4.22 – 4.06 (m, 1H), 1.53 (d, *J* = 6.8 Hz, 3H). **<sup>13</sup>C NMR** (CDCl<sub>3</sub>, 101 MHz, ppm) δ 139.0, 137.3, 135.5, 135.2, 134.7, 134.6, 129.9, 129.8, 128.7, 128.5, 128.0, 127.5, 126.4, 126.3, 124.6, 122.1, 120.2, 119.4, 114.8, 110.8, 33.6, 20.3. **HRMS** (ESI) *m/z*: [M+Na]<sup>+</sup> calcd for C<sub>24</sub>H<sub>20</sub>ClNNa: 380.1176. Found 380.1180.

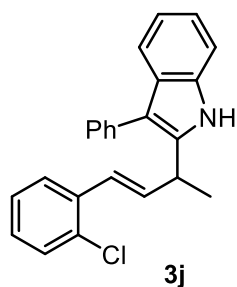

The reaction of **1j** (24.7 mg, 0.15 mmol) and **2a** (19.4 mg, 0.10 mmol) was stirred in a 40 °C oil bath under argon for 28 h. Compound **3j** was isolated by flash column chromatography (SiO<sub>2</sub>, PE/EA = 80:1, v/v) in 42% yield (14.7 mg) as yellow oil, *R<sub>f</sub>* = 0.42 (silica gel, PE/EA = 15:1). **<sup>1</sup>H NMR** (CDCl<sub>3</sub>, 400 MHz, ppm) δ 8.04 (s, 1H), 7.64 (d, *J* = 8.0 Hz, 1H), 7.58 – 7.52 (m, 2H), 7.51 – 7.44 (m, 3H), 7.39 – 7.31 (m, 3H), 7.23 – 7.15 (m, 3H), 7.15 – 7.07 (m, 1H), 6.89 (dd, *J* = 16.0, 2.0 Hz, 1H), 6.42 (dd, *J* = 16.0, 5.2 Hz, 1H), 4.24 – 4.12 (m, 1H), 1.57 (d, *J* = 7.2 Hz, 3H). **<sup>13</sup>C NMR** (CDCl<sub>3</sub>, 101 MHz, ppm) δ 137.5, 135.8, 135.5, 135.4, 135.2, 133.1, 129.9, 129.8,

128.7, 128.6, 128.1, 127.0, 126.9, 126.4, 126.1, 122.1, 120.2, 119.4, 114.6, 110.8, 33.9, 20.1. **HRMS** (ESI)  $m/z$ :  $[M+Na]^+$  calcd for  $C_{24}H_{20}ClNNa$ : 380.1176. Found 380.1175.

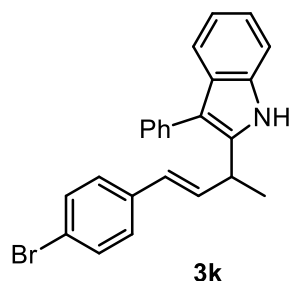

The reaction of **1k** (31.4 mg, 0.15 mmol) and **2a** (19.4 mg, 0.10 mmol) was stirred in a 40 °C oil bath under argon for 6 h. Compound **3k** was isolated by flash column chromatography ( $SiO_2$ , PE/EA = 80:1, v/v) in 54% yield (21.5 mg) as yellow solid,  $R_f$  = 0.53 (silica gel, PE/EA = 15:1).  **$^1H$  NMR** ( $CDCl_3$ , 400 MHz, ppm)  $\delta$  8.01 (s, 1H), 7.65 (d,  $J$  = 7.6 Hz, 1H), 7.54 – 7.49 (m, 2H), 7.49 – 7.43 (m, 2H), 7.43 – 7.39 (m, 2H), 7.38 – 7.30 (m, 2H), 7.23 – 7.17 (m, 3H), 7.16 – 7.09 (m, 1H), 6.45 (dd,  $J$  = 16.0, 5.2 Hz, 1H), 6.33 (dd,  $J$  = 16.0, 1.6 Hz, 1H), 4.22 – 4.06 (m, 1H), 1.53 (d,  $J$  = 7.2 Hz, 3H).  **$^{13}C$  NMR** ( $CDCl_3$ , 101 MHz, ppm)  $\delta$  137.4, 136.1, 135.5, 135.2, 133.9, 131.8, 129.8, 128.7, 128.6, 128.0, 127.9, 126.4, 122.1, 121.3, 120.2, 119.4, 114.7, 110.8, 33.6, 20.3. **HRMS** (ESI)  $m/z$ :  $[M+Na]^+$  calcd for  $C_{24}H_{20}BrNNa$ : 424.0671. Found 424.0672.

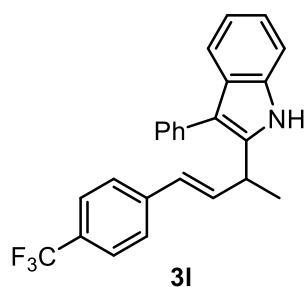

The reaction of **1l** (29.7 mg, 0.15 mmol) and **2a** (19.4 mg, 0.10 mmol) was stirred in a 40 °C oil bath under argon for 24 h. Compound **3l** was isolated by flash column chromatography ( $SiO_2$ , PE/EA = 80:1~60:1, v/v) in 27% yield (10.3 mg) as yellow solid,  $R_f$  = 0.27 (silica gel, PE/EA = 15:1).  **$^1H$  NMR** ( $CDCl_3$ , 400 MHz, ppm)  $\delta$  8.03

(s, 1H), 7.65 (d,  $J = 7.6$  Hz, 1H), 7.56 – 7.50 (m, 4H), 7.50 – 7.40 (m, 4H), 7.40 – 7.30 (m, 2H), 7.23 – 7.18 (m, 1H), 7.17 – 7.09 (m, 1H), 6.56 (dd,  $J = 16.0, 5.2$  Hz, 1H), 6.42 (d,  $J = 16.0$  Hz, 1H), 4.29 – 4.10 (m, 1H), 1.56 (d,  $J = 6.4$  Hz, 3H).  $^{13}\text{C}$  NMR (CDCl<sub>3</sub>, 101 MHz, ppm)  $\delta$  140.6, 137.1, 135.8, 135.5, 135.1, 129.8, 129.4 (q,  $J = 32.5$  Hz), 128.7, 128.6, 128.0, 126.5, 126.4, 125.7 (q,  $J = 3.9$  Hz), 122.2, 120.3, 119.4, 114.9, 110.8, 33.7, 20.2.  $^{19}\text{F}$  NMR (CDCl<sub>3</sub>, 376 MHz, ppm)  $\delta$  -62.5. (s, 3F). HRMS (ESI)  $m/z$ :  $[\text{M}+\text{Na}]^+$  calcd for C<sub>25</sub>H<sub>20</sub>F<sub>3</sub>NNa: 414.1440. Found 414.1443.

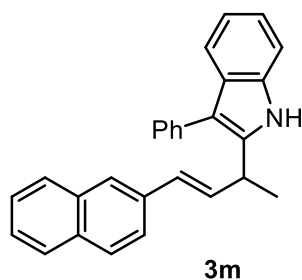

The reaction of **1m** (27.0 mg, 0.15 mmol) and **2a** (19.4 mg, 0.10 mmol) was stirred in a 40 °C oil bath under argon for 3 h. Compound **3m** was isolated by flash column chromatography (SiO<sub>2</sub>, PE/EA = 80:1~60:1, v/v) in 88% yield (32.6 mg) as yellow solid,  $R_f = 0.34$  (silica gel, PE/EA = 15:1).  $^1\text{H}$  NMR (CDCl<sub>3</sub>, 400 MHz, ppm)  $\delta$  8.04 (s, 1H), 7.81 – 7.72 (m, 1H), 7.69 – 7.62 (m, 2H), 7.56 (d,  $J = 7.6$  Hz, 3H), 7.47 (t,  $J = 7.6$  Hz, 2H), 7.41 (m, 2H), 7.37 – 7.30 (m, 2H), 7.22 – 7.16 (m, 1H), 7.16 – 7.10 (m, 1H), 6.66 – 6.50 (m, 2H), 4.30 – 4.12 (m, 1H), 1.56 (d,  $J = 7.2$  Hz, 3H).  $^{13}\text{C}$  NMR (CDCl<sub>3</sub>, 101 MHz, ppm)  $\delta$  137.8, 135.5, 135.3, 134.6, 133.7, 133.4, 133.0, 129.9 (d,  $J = 1.7$  Hz), 128.7, 128.4, 128.0, 127.8, 126.4, 126.3, 126.3, 125.9, 123.5, 122.1, 120.2, 119.4, 114.6, 110.8, 33.7, 20.4. HRMS (ESI)  $m/z$ :  $[\text{M}+\text{Na}]^+$  calcd for C<sub>28</sub>H<sub>23</sub>NNa: 396.1723. Found 396.1723.

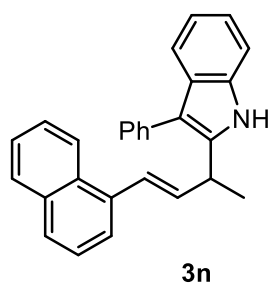

The reaction of **1n** (27.0 mg, 0.15 mmol) and **2a** (19.4 mg, 0.10 mmol) was stirred in a 40 °C oil bath under argon for 3 h. Compound **3n** was isolated by flash column chromatography (SiO<sub>2</sub>, PE/EA = 80:1~60:1, v/v) in 74% yield (27.5 mg) as yellow solid,  $R_f = 0.36$  (silica gel, PE/EA = 15:1). **<sup>1</sup>H NMR** (CDCl<sub>3</sub>, 400 MHz, ppm)  $\delta$  8.11 (s, 1H), 8.04 – 7.97 (m, 1H), 7.86 – 7.80 (m, 1H), 7.75 (d,  $J = 8.4$  Hz, 1H), 7.68 (d,  $J = 8.0$  Hz, 1H), 7.59 (d,  $J = 8.0$  Hz, 2H), 7.54 (d,  $J = 6.8$  Hz, 1H), 7.51 – 7.45 (m, 4H), 7.44 – 7.31 (m, 3H), 7.25 – 7.05 (m, 3H), 6.47 (dd,  $J = 15.6, 5.2$  Hz, 1H), 4.33 – 4.17 (m, 1H), 1.62 (d,  $J = 7.2$  Hz, 3H). **<sup>13</sup>C NMR** (CDCl<sub>3</sub>, 101 MHz, ppm)  $\delta$  137.8, 136.3, 135.5, 135.4, 134.9, 133.7, 131.2, 129.9, 128.7, 128.7, 128.1, 128.0, 127.1, 126.4, 126.2, 125.9, 125.7, 123.8, 122.1, 120.2, 119.4, 114.7, 110.8, 34.2, 20.5. **HRMS** (ESI)  $m/z$ : [M+Na]<sup>+</sup> calcd for C<sub>28</sub>H<sub>23</sub>NNa: 396.1723. Found 396.1723.

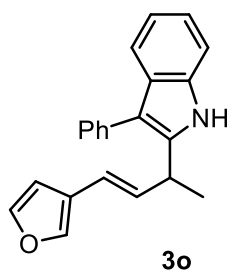

The reaction of **1o** (18.0 mg, 0.15 mmol) and **2a** (19.4 mg, 0.10 mmol) was stirred at rt under argon for 24 h. Compound **3o** was isolated by flash column chromatography (SiO<sub>2</sub>, PE/EA = 80:1~60:1, v/v) in 37% yield (11.5 mg) as yellow oil,  $R_f = 0.28$  (silica gel, PE/EA = 15:1). **<sup>1</sup>H NMR** (CDCl<sub>3</sub>, 400 MHz, ppm)  $\delta$  8.01 (s, 1H), 7.65 (d,  $J = 8.0$  Hz, 1H), 7.52 (d,  $J = 7.2$  Hz, 2H), 7.46 (t,  $J = 7.6$  Hz, 2H), 7.40 – 7.29 (m, 4H), 7.23 – 7.16 (m, 1H), 7.16 – 7.09 (m, 1H), 6.50 (s, 1H), 6.28 (d,  $J = 16.8$  Hz, 1H), 6.18 (dd,  $J = 16.0, 4.4$  Hz, 1H), 4.32 – 3.96 (m, 1H), 1.50 (d,  $J = 7.2$  Hz, 3H). **<sup>13</sup>C NMR** (CDCl<sub>3</sub>, 101 MHz, ppm)  $\delta$  143.7, 140.4, 137.8, 135.3, 132.6, 129.8, 128.7, 128.0, 126.3, 124.1, 122.0, 120.1, 119.6, 119.3, 114.6, 110.8, 107.5, 33.4, 20.3. **HRMS** (ESI)  $m/z$ : [M+Na]<sup>+</sup> calcd for C<sub>22</sub>H<sub>19</sub>NONa: 336.1359. Found 336.1351.

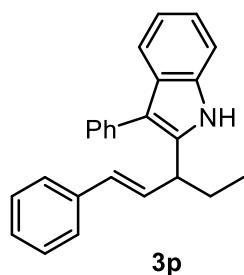

The reaction of **1p** (21.6 mg, 0.15 mmol) and **2a** (19.4 mg, 0.10 mmol) was stirred in a 40 °C oil bath under argon for 24 h. Compound **3p** was isolated by flash column chromatography (SiO<sub>2</sub>, PE/EA = 80:1, v/v) in 72% yield (24.1 mg) as yellow solid,  $R_f$  = 0.40 (silica gel, PE/EA = 15:1). **<sup>1</sup>H NMR** (CDCl<sub>3</sub>, 400 MHz, ppm) δ 8.02 (s, 1H), 7.63 (d,  $J$  = 8.0 Hz, 1H), 7.52 (d,  $J$  = 7.2 Hz, 2H), 7.49 – 7.41 (m, 2H), 7.39 – 7.25 (m, 6H), 7.24 – 7.16 (m, 2H), 7.15 – 7.09 (m, 1H), 6.53 – 6.22 (m, 2H), 3.85 (q,  $J$  = 6.8 Hz, 1H), 2.12 – 1.73 (m, 2H), 0.87 (t,  $J$  = 7.2 Hz, 3H). **<sup>13</sup>C NMR** (CDCl<sub>3</sub>, 101 MHz, ppm) δ 137.3, 136.5, 135.6, 135.3, 132.0, 130.5, 130.0, 128.7, 128.6, 128.1, 127.5, 126.3, 126.3, 122.0, 120.0, 119.3, 116.0, 110.8, 41.3, 28.2, 12.3. **HRMS** (ESI)  $m/z$ : [M+Na]<sup>+</sup> calcd for C<sub>25</sub>H<sub>23</sub>NNa: 360.1723. Found 360.1726.

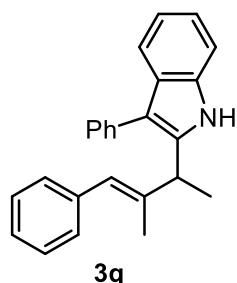

The reaction of **1q** (21.6 mg, 0.15 mmol) and **2a** (19.4 mg, 0.10 mmol) was stirred in a 40 °C oil bath under argon for 21 h. Compound **3q** was isolated by flash column chromatography (SiO<sub>2</sub>, PE/EA = 80:1, v/v) in 93% yield (31.1 mg) as yellow oil,  $R_f$  = 0.43 (silica gel, PE/EA = 15:1). **<sup>1</sup>H NMR** (CDCl<sub>3</sub>, 400 MHz, ppm) δ 8.03 (s, 1H), 7.63 (d,  $J$  = 8.0 Hz, 1H), 7.58 – 7.52 (m, 2H), 7.51 – 7.44 (m, 2H), 7.38 – 7.31 (m, 4H), 7.29 – 7.24 (m, 2H), 7.24 – 7.16 (m, 2H), 7.15 – 7.09 (m, 1H), 6.49 (s, 1H), 3.96 (q,  $J$  = 7.0 Hz, 1H), 1.80 (s, 3H), 1.57 (d,  $J$  = 7.2 Hz, 3H). **<sup>13</sup>C NMR** (CDCl<sub>3</sub>, 101 MHz, ppm) δ 141.1, 138.0, 138.0, 135.4, 135.3, 129.9, 129.1, 128.6, 128.3, 128.3, 126.5, 126.3, 124.9, 121.9, 120.0, 119.3, 115.2, 110.8, 39.6, 19.5, 18.1. **HRMS** (ESI)

m/z:  $[M+Na]^+$  calcd for  $C_{25}H_{23}NNa$ : 360.1723. Found 360.1725.

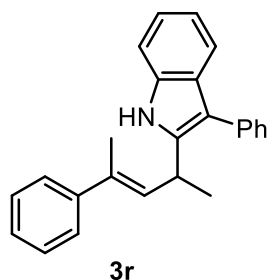

The reaction of **1r** (21.6 mg, 0.15 mmol) and **2a** (19.4 mg, 0.10 mmol) was stirred in a 40 °C oil bath under argon for 9 h. Compound **3r** was isolated by flash column chromatography ( $SiO_2$ , PE/EA = 80:1, v/v) in 76% yield (22.5 mg) as yellow solid,  $R_f$  = 0.40 (silica gel, PE/EA = 15:1).  **$^1H$  NMR** ( $CDCl_3$ , 400 MHz, ppm)  $\delta$  8.08 (s, 1H), 7.61 (d,  $J$  = 8.0 Hz, 1H), 7.55 – 7.49 (m, 2H), 7.50 – 7.43 (m, 2H), 7.40 – 7.27 (m, 6H), 7.26 – 7.21 (m, 1H), 7.20 – 7.15 (m, 1H), 7.14 – 7.08 (m, 1H), 5.96 (dd,  $J$  = 8.4, 1.2 Hz, 1H), 4.51 – 4.16 (m, 1H), 1.89 (s, 3H), 1.48 (d,  $J$  = 6.8 Hz, 3H).  **$^{13}C$  NMR** ( $CDCl_3$ , 101 MHz, ppm)  $\delta$  143.4, 139.2, 136.5, 135.5, 135.3, 130.4, 130.0, 128.6, 128.4, 128.1, 127.2, 126.3, 125.9, 121.8, 120.1, 119.2, 114.0, 110.7, 31.0, 22.0, 16.2. **HRMS** (ESI) m/z:  $[M+Na]^+$  calcd for  $C_{25}H_{23}NNa$ : 360.1723. Found 360.1719.

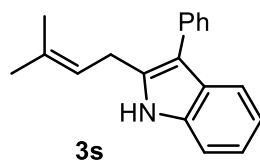

The reaction of **1s** (21  $\mu$ L, 2.0 mmol) and **2a** (19.4 mg, 0.10 mmol) was stirred in a 40 °C oil bath under argon for 28 h. Compound **3s** was isolated by flash column chromatography ( $SiO_2$ , PE/EA = 80:1, v/v) in 41% yield (10.5 mg) as yellow oil,  $R_f$  = 0.41 (silica gel, PE/EA = 15:1).  **$^1H$  NMR** ( $CDCl_3$ , 400 MHz, ppm)  $\delta$  8.01 (s, 1H), 7.67 (d,  $J$  = 8.0 Hz, 1H), 7.51 (d,  $J$  = 8.0 Hz, 2H), 7.46 (t,  $J$  = 7.6 Hz, 2H), 7.38 – 7.27 (m, 2H), 7.20 – 7.07 (m, 2H), 5.49 – 5.30 (m, 1H), 3.60 (d,  $J$  = 7.2 Hz, 2H), 1.79 (s, 3H), 1.73 (s, 3H).  **$^{13}C$  NMR** ( $CDCl_3$ , 101 MHz, ppm)  $\delta$  135.5, 135.3, 135.1, 134.8, 129.7, 128.6, 128.1, 126.0, 121.7, 120.6, 120.1, 119.1, 114.1, 110.6, 26.0, 25.7, 18.1. **HRMS** (ESI) m/z:  $[M+Na]^+$  calcd for  $C_{19}H_{19}NNa$ : 284.1410. Found 284.1395.

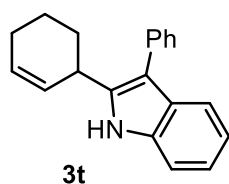

The reaction of **1t** (20  $\mu$ L, 2.0 mmol) and **2a** (19.4 mg, 0.10 mmol) was stirred in a 40  $^{\circ}$ C oil bath under argon for 28 h. Compound **3t** was isolated by flash column chromatography (SiO<sub>2</sub>, PE/EA = 80:1, v/v) in 37% yield (9.9 mg) as yellow oil,  $R_f$  = 0.43 (silica gel, PE/EA = 15:1). **<sup>1</sup>H NMR** (CDCl<sub>3</sub>, 400 MHz, ppm)  $\delta$  8.10 (s, 1H), 7.67 (d,  $J$  = 7.6 Hz, 1H), 7.57 – 7.45 (m, 4H), 7.42 – 7.32 (m, 2H), 7.24 – 7.18 (m, 1H), 7.14 (t,  $J$  = 7.4 Hz, 1H), 6.12 – 5.94 (m, 1H), 5.88 – 5.67 (m, 1H), 4.19 – 3.82 (m, 1H), 2.27 – 2.04 (m, 3H), 1.92 – 1.64 (m, 3H). **<sup>13</sup>C NMR** (CDCl<sub>3</sub>, 101 MHz, ppm)  $\delta$  139.2, 135.4, 135.1, 130.1, 129.8, 128.6, 128.5, 128.2, 126.1, 121.8, 120.0, 119.2, 114.0, 110.7, 33.2, 30.9, 25.0, 21.5. **HRMS** (ESI)  $m/z$ : [M+Na]<sup>+</sup> calcd for C<sub>20</sub>H<sub>19</sub>NNa: 296.1410. Found 296.1417.

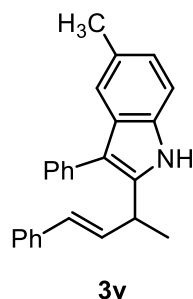

The reaction of **1a** (19.6 mg, 0.15 mmol) and **2b** (20.7 mg, 0.10 mmol) was stirred in a 40  $^{\circ}$ C oil bath under argon for 10 h. Compound **3v** was isolated by flash column chromatography (SiO<sub>2</sub>, PE/EA = 80:1, v/v) in 63% yield (21.0 mg) as yellow oil,  $R_f$  = 0.61 (silica gel, PE/EA = 15:1). **<sup>1</sup>H NMR** (CDCl<sub>3</sub>, 400 MHz, ppm)  $\delta$  7.92 (s, 1H), 7.56 – 7.50 (m, 2H), 7.49 – 7.41 (m, 3H), 7.38 – 7.26 (m, 5H), 7.25 – 7.18 (m, 2H), 7.01 (dd,  $J$  = 8.0, 1.2 Hz, 1H), 6.51 – 6.36 (m, 2H), 4.24 – 4.06 (m, 1H), 2.42 (s, 3H), 1.51 (d,  $J$  = 7.2 Hz, 3H). **<sup>13</sup>C NMR** (CDCl<sub>3</sub>, 101 MHz, ppm)  $\delta$  137.9, 137.2, 135.5, 133.8, 133.1, 129.9, 129.7, 129.4, 128.7, 128.7, 128.3, 127.6, 126.4, 126.2, 123.5, 119.0, 114.2, 110.5, 33.6, 21.6, 20.4. **HRMS** (ESI)  $m/z$ : [M+Na]<sup>+</sup> calcd for



C<sub>25</sub>H<sub>23</sub>NNa: 360.1723. Found 360.1725.

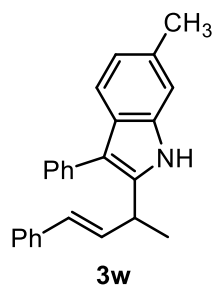

The reaction of **1a** (19.6 mg, 0.15 mmol) and **2c** (20.7 mg, 0.10 mmol) was stirred in a 40 °C oil bath under argon for 5 h. Compound **3w** was isolated by flash column chromatography (SiO<sub>2</sub>, PE/EA = 80:1, v/v) in 74% yield (24.9 mg) as yellow oil,  $R_f$  = 0.50 (silica gel, PE/EA = 15:1). **<sup>1</sup>H NMR** (CDCl<sub>3</sub>, 500 MHz, ppm)  $\delta$  7.88 (s, 1H), 7.57 – 7.49 (m, 3H), 7.48 – 7.42 (m, 2H), 7.37 – 7.25 (m, 5H), 7.24 – 7.18 (m, 1H), 7.13 (s, 1H), 6.96 (d,  $J$  = 8.0 Hz, 1H), 6.52 – 6.35 (m, 2H), 4.35 – 3.95 (m, 1H), 2.46 (s, 3H), 1.51 (d,  $J$  = 7.0 Hz, 3H). **<sup>13</sup>C NMR** (CDCl<sub>3</sub>, 101 MHz, ppm)  $\delta$  137.2, 137.0, 135.9, 135.5, 133.1, 131.8, 129.8, 129.6, 128.7, 128.6, 127.5, 126.3, 126.2, 125.8, 121.8, 119.0, 114.4, 110.8, 33.5, 21.8, 20.3. **HRMS** (ESI)  $m/z$ : [M+Na]<sup>+</sup> calcd for C<sub>25</sub>H<sub>23</sub>NNa: 360.1723. Found 360.1728.

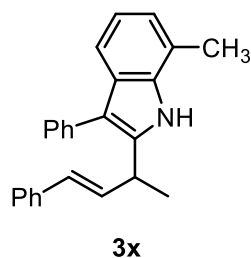

The reaction of **1a** (19.6 mg, 0.15 mmol) and **2d** (20.7 mg, 0.10 mmol) was stirred in a 40 °C oil bath under argon for 3 h. Compound **3x** was isolated by flash column chromatography (SiO<sub>2</sub>, PE/EA = 80:1, v/v) in 60% yield (20.0 mg) as yellow oil,  $R_f$  = 0.51 (silica gel, PE/EA = 15:1). **<sup>1</sup>H NMR** (CDCl<sub>3</sub>, 500 MHz, ppm)  $\delta$  7.87 (s, 1H), 7.51 (dd,  $J$  = 13.5, 8.0 Hz, 3H), 7.45 (t,  $J$  = 7.5 Hz, 2H), 7.39 – 7.27 (m, 5H), 7.24 – 7.19 (m, 1H), 7.05 (t,  $J$  = 7.5 Hz, 1H), 7.00 (d,  $J$  = 7.5 Hz, 1H), 6.49 (dd,  $J$  = 16.0, 4.5 Hz, 1H), 6.43 (d,  $J$  = 16.5 Hz, 1H), 4.20 – 4.11 (m, 1H), 2.50 (s, 3H), 1.55 (d,  $J$  = 7.0

Hz, 3H).  $^{13}\text{C}$  NMR ( $\text{CDCl}_3$ , 101 MHz, ppm)  $\delta$  137.5, 137.2, 135.4, 135.0, 133.1, 129.9, 129.8, 128.7, 128.7, 127.6, 126.4, 126.3, 122.7, 120.4, 120.0, 117.1, 115.2, 33.6, 20.4, 16.9. HRMS (ESI)  $m/z$ :  $[\text{M}+\text{Na}]^+$  calcd for  $\text{C}_{25}\text{H}_{23}\text{NNa}$ : 360.1723. Found 360.1725.

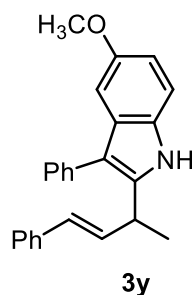

The reaction of **1a** (19.6 mg, 0.15 mmol) and **2e** (22.3 mg, 0.10 mmol) was stirred in a 40 °C oil bath under argon for 21 h. Compound **3y** was isolated by flash column chromatography ( $\text{SiO}_2$ , PE/EA = 50:1, v/v) in 58% yield (20.3 mg) as yellow solid,  $R_f$  = 0.28 (silica gel, PE/EA = 15:1).  $^1\text{H}$  NMR ( $\text{CDCl}_3$ , 400 MHz, ppm)  $\delta$  77.93 (s, 1H), 7.55 – 7.50 (m, 2H), 7.50 – 7.43 (m, 2H), 7.40 – 7.27 (m, 5H), 7.27 – 7.19 (m, 2H), 7.11 (d,  $J$  = 2.4 Hz, 1H), 6.85 (dd,  $J$  = 8.4, 2.4 Hz, 1H), 6.53 – 6.35 (m, 2H), 4.19 – 4.06 (m, 1H), 3.81 (s, 3H), 1.52 (d,  $J$  = 7.2 Hz, 3H).  $^{13}\text{C}$  NMR ( $\text{CDCl}_3$ , 101 MHz, ppm)  $\delta$  154.7, 138.7, 137.1, 135.4, 132.9, 130.6, 129.8, 129.7, 128.8, 128.4, 127.6, 126.4, 126.3, 114.5, 112.1, 111.5, 101.4, 56.2, 33.6, 20.4. HRMS (ESI)  $m/z$ :  $[\text{M}+\text{Na}]^+$  calcd for  $\text{C}_{25}\text{H}_{23}\text{NONa}$ : 376.1672. Found 376.1672.

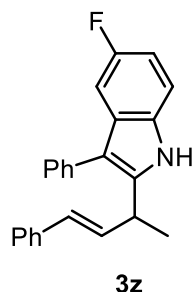

The reaction of **1a** (19.6 mg, 0.15 mmol) and **2f** (21.1 mg, 0.10 mmol) was stirred in a 40 °C oil bath under argon for 10 h. Compound **3z** was isolated by flash column chromatography ( $\text{SiO}_2$ , PE/EA = 80:1, v/v) in 59% yield (20.0 mg) as yellow solid,  $R_f$

= 0.49 (silica gel, PE/EA = 15:1). **<sup>1</sup>H NMR** (CDCl<sub>3</sub>, 400 MHz, ppm) δ 8.01 (s, 1H), 7.55 – 7.43 (m, 4H), 7.37 – 7.27 (m, 6H), 7.25 – 7.19 (m, 2H), 6.99 – 6.88 (m, 1H), 6.52 – 6.37 (m, 2H), 4.19 – 4.07 (m, 1H), 1.52 (d, *J* = 7.2 Hz, 3H). **<sup>13</sup>C NMR** (CDCl<sub>3</sub>, 101 MHz, ppm) δ 158.5 (d, *J* = 235.2 Hz), 139.7, 137.0, 134.8, 132.6, 131.9, 129.9, 129.7, 128.8 (d, *J* = 4.4 Hz), 128.5 (d, *J* = 9.7 Hz), 127.7, 126.5, 126.4, 114.8 (d, *J* = 4.6 Hz), 111.3 (d, *J* = 9.6 Hz), 110.2 (d, *J* = 26.4 Hz), 104.4 (d, *J* = 24.0 Hz), 33.6, 20.3. **<sup>19</sup>F NMR** (CDCl<sub>3</sub>, 376 MHz, ppm) δ -124.2. (s, 1F). **HRMS** (ESI) *m/z*: [M+Na]<sup>+</sup> calcd for C<sub>24</sub>H<sub>20</sub>FNNa: 364.1472. Found 364.1470.

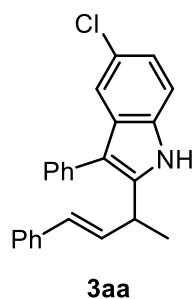

The reaction of **1a** (19.6 mg, 0.15 mmol) and **2g** (22.8 mg, 0.10 mmol) was stirred in a 40 °C oil bath under argon for 9 h. Compound **3aa** was isolated by flash column chromatography (SiO<sub>2</sub>, PE/EA = 80:1, v/v) in 83% yield (29.6 mg) as yellow oil, *R<sub>f</sub>* = 0.44 (silica gel, PE/EA = 15:1). **<sup>1</sup>H NMR** (CDCl<sub>3</sub>, 400 MHz, ppm) δ 8.05 (s, 1H), 7.59 (d, *J* = 2.0 Hz, 1H), 7.52 – 7.43 (m, 4H), 7.38 – 7.29 (m, 5H), 7.27 – 7.20 (m, 2H), 7.13 (dd, *J* = 8.4, 2.0 Hz, 1H), 6.54 – 6.36 (m, 2H), 4.36 – 4.04 (m, 1H), 1.52 (d, *J* = 7.2 Hz, 3H). **<sup>13</sup>C NMR** (CDCl<sub>3</sub>, 101 MHz, ppm) δ 139.3, 137.0, 134.6, 133.8, 132.5, 130.0, 129.8, 129.2, 128.8, 128.8, 127.7, 126.7, 126.4, 125.9, 122.2, 118.8, 114.4, 111.8, 33.6, 20.3. **HRMS** (ESI) *m/z*: [M+Na]<sup>+</sup> calcd for C<sub>24</sub>H<sub>20</sub>CINNa: 380.1176. Found 380.1183.

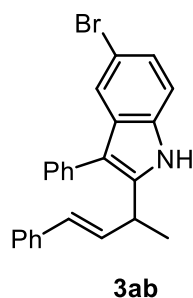

The reaction of **1a** (19.6 mg, 0.15 mmol) and **2h** (27.2 mg, 0.10 mmol) was stirred in a 40 °C oil bath under argon for 21 h. Compound **3ab** was isolated by flash column chromatography (SiO<sub>2</sub>, PE/EA = 80:1, v/v) in 58% yield (23.0 mg) as yellow solid,  $R_f$  = 0.46 (silica gel, PE/EA = 15:1). <sup>1</sup>H NMR (CDCl<sub>3</sub>, 400 MHz, ppm) δ 8.07 (s, 1H), 7.74 (d,  $J$  = 2.0 Hz, 1H), 7.51 – 7.44 (m, 4H), 7.39 – 7.27 (m, 5H), 7.27 – 7.18 (m, 3H), 6.51 – 6.37 (m, 2H), 4.21 – 4.02 (m, 1H), 1.53 (d,  $J$  = 6.8 Hz, 3H). <sup>13</sup>C NMR (CDCl<sub>3</sub>, 101 MHz, ppm) δ 139.1, 137.0, 134.5, 134.1, 132.5, 130.0, 129.9, 129.8, 128.8, 128.8, 127.7, 126.7, 126.4, 124.8, 121.9, 114.3, 113.4, 112.2, 33.5, 20.3. HRMS (ESI)  $m/z$ : [M+Na]<sup>+</sup> calcd for C<sub>24</sub>H<sub>20</sub>BrNNa: 424.0671. Found 424.0673.

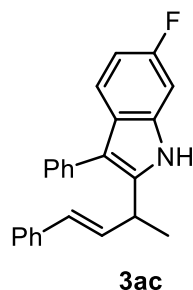

The reaction of **1a** (19.6 mg, 0.15 mmol) and **2i** (21.1 mg, 0.10 mmol) was stirred in a 40 °C oil bath under argon for 3 h. Compound **3ac** was isolated by flash column chromatography (SiO<sub>2</sub>, PE/EA = 80:1, v/v) in 82% yield (27.7 mg) as yellow solid,  $R_f$  = 0.41 (silica gel, PE/EA = 15:1). <sup>1</sup>H NMR (CDCl<sub>3</sub>, 400 MHz, ppm) δ 8.01 (s, 1H), 7.55 – 7.43 (m, 5H), 7.37 – 7.27 (m, 5H), 7.25 – 7.19 (m, 1H), 7.03 (dd,  $J$  = 9.6, 2.0 Hz, 1H), 6.91 – 6.83 (m, 1H), 6.55 – 6.35 (m, 2H), 4.16 – 4.05 (m, 1H), 1.52 (d,  $J$  = 7.2 Hz, 3H). <sup>13</sup>C NMR (CDCl<sub>3</sub>, 101 MHz, ppm) δ 160.0 (d,  $J$  = 238.4 Hz), 138.0 (d,  $J$  = 3.6 Hz), 137.0, 135.4 (d,  $J$  = 12.4 Hz), 134.9, 132.7, 129.9, 129.8, 128.8, 127.7, 126.5, 126.4, 124.6, 120.1 (d,  $J$  = 10.0 Hz), 114.5, 108.6 (d,  $J$  = 24.2 Hz), 97.2 (d,  $J$  =

26.2 Hz), 33.6, 20.3. **<sup>19</sup>F NMR** (CDCl<sub>3</sub>, 376 MHz, ppm) δ -121.3. (s, 1F). **HRMS** (ESI) m/z: [M+Na]<sup>+</sup> calcd for C<sub>24</sub>H<sub>20</sub>FNNa: 364.1472. Found 364.1469.

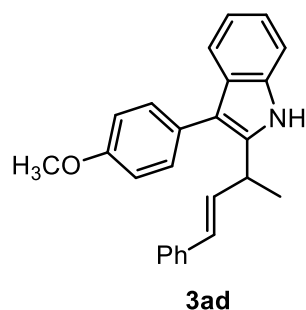

The reaction of **1a** (19.6 mg, 0.15 mmol) and **2j** (22.3 mg, 0.10 mmol) was stirred in a 40 °C oil bath under argon for 5 h. Compound **3ad** was isolated by flash column chromatography (SiO<sub>2</sub>, PE/EA = 80:1~50:1, v/v) in 79% yield (27.6 mg) as yellow oil, R<sub>f</sub> = 0.36 (silica gel, PE/EA = 15:1). **<sup>1</sup>H NMR** (CDCl<sub>3</sub>, 400 MHz, ppm) δ 7.99 (s, 1H), 7.61 (d, *J* = 8.0 Hz, 1H), 7.49 – 7.42 (m, 2H), 7.39 – 7.26 (m, 5H), 7.25 – 7.15 (m, 2H), 7.14 – 7.08 (m, 1H), 7.05 – 6.99 (m, 2H), 6.53 – 6.37 (m, 2H), 4.17 – 4.05 (m, 1H), 3.86 (s, 3H), 1.52 (d, *J* = 7.2 Hz, 3H). **<sup>13</sup>C NMR** (CDCl<sub>3</sub>, 101 MHz, ppm) δ 158.3, 137.5, 137.2, 135.4, 133.1, 130.9, 129.7, 128.7, 128.3, 127.6, 127.6, 126.4, 121.9, 120.0, 119.3, 114.2, 114.1, 110.7, 55.5, 33.6, 20.3. **HRMS** (ESI) m/z: [M+Na]<sup>+</sup> calcd for C<sub>25</sub>H<sub>23</sub>NONa: 376.1672. Found 376.1673.

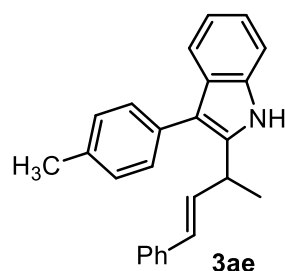

The reaction of **1a** (19.6 mg, 0.15 mmol) and **2k** (22.3 mg, 0.10 mmol) was stirred in a 40 °C oil bath under argon for 3 h. Compound **3ae** was isolated by flash column chromatography (SiO<sub>2</sub>, PE/EA = 80:1, v/v) in 76% yield (25.4 mg) as yellow oil, R<sub>f</sub> = 0.44 (silica gel, PE/EA = 15:1). **<sup>1</sup>H NMR** (CDCl<sub>3</sub>, 400 MHz, ppm) δ 8.01 (s, 1H), 7.64 (d, *J* = 8.0 Hz, 1H), 7.43 (d, *J* = 7.6 Hz, 2H), 7.37 – 7.31 (m, 3H), 7.31 – 7.25 (m, 4H), 7.24 – 7.15 (m, 2H), 7.14 – 7.06 (m, 1H), 6.54 – 6.33 (m, 2H), 4.17 – 4.07 (m,

1H), 2.42 (s, 3H), 1.51 (d,  $J = 7.2$  Hz, 3H).  $^{13}\text{C}$  NMR ( $\text{CDCl}_3$ , 101 MHz, ppm)  $\delta$  137.6, 137.2, 135.9, 135.5, 133.0, 132.2, 129.7, 129.7, 129.4, 128.7, 128.1, 127.6, 126.4, 121.9, 120.0, 119.4, 114.4, 110.8, 33.6, 21.4, 20.4. HRMS (ESI)  $m/z$ :  $[\text{M}+\text{Na}]^+$  calcd for  $\text{C}_{25}\text{H}_{23}\text{NNa}$ : 360.1723. Found 360.1723.

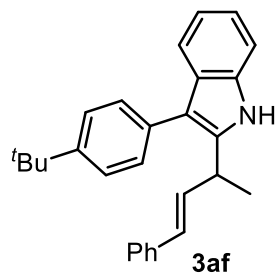

The reaction of **1a** (19.6 mg, 0.15 mmol) and **2l** (24.9 mg, 0.10 mmol) was stirred in a 40 °C oil bath under argon for 21 h. Compound **3af** was isolated by flash column chromatography ( $\text{SiO}_2$ , PE/EA = 80:1~50:1, v/v) in 74% yield (28.0 mg) as yellow oil,  $R_f = 0.41$  (silica gel, PE/EA = 15:1).  $^1\text{H}$  NMR ( $\text{CDCl}_3$ , 400 MHz, ppm)  $\delta$  7.99 (s, 1H), 7.68 (d,  $J = 7.6$  Hz, 1H), 7.48 (s, 4H), 7.37 – 7.25 (m, 5H), 7.24 – 7.15 (m, 2H), 7.14 – 7.08 (m, 1H), 6.57 – 6.31 (m, 2H), 4.22 – 4.11 (m, 1H), 1.53 (d,  $J = 7.2$  Hz, 3H), 1.38 (s, 9H).  $^{13}\text{C}$  NMR ( $\text{CDCl}_3$ , 101 MHz, ppm)  $\delta$  149.0, 137.6, 137.2, 135.5, 133.1, 132.2, 129.7, 129.4, 128.7, 128.1, 127.6, 126.4, 125.6, 121.9, 120.0, 119.5, 114.4, 110.7, 34.7, 33.5, 31.6, 20.4. HRMS (ESI)  $m/z$ :  $[\text{M}+\text{Na}]^+$  calcd for  $\text{C}_{28}\text{H}_{29}\text{NNa}$ : 402.2192. Found 402.2195.

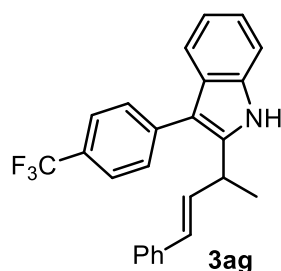

The reaction of **1a** (19.6 mg, 0.15 mmol) and **2m** (26.1 mg, 0.10 mmol) was stirred in a 40 °C oil bath under argon for 21 h. Compound **3ag** was isolated by flash column chromatography ( $\text{SiO}_2$ , PE/EA = 80:1, v/v) in 77% yield (30.1 mg) as yellow solid,  $R_f = 0.46$  (silica gel, PE/EA = 15:1).  $^1\text{H}$  NMR ( $\text{CDCl}_3$ , 400 MHz, ppm)  $\delta$  8.11 (s, 1H),

7.71 (d,  $J = 8.0$  Hz, 2H), 7.66 – 7.61 (m, 3H), 7.42 – 7.27 (m, 5H), 7.26 – 7.18 (m, 2H), 7.18 – 7.12 (m, 1H), 6.54 – 6.35 (m, 2H), 4.17 – 4.05 (m, 1H), 1.54 (d,  $J = 7.2$  Hz, 3H).  $^{13}\text{C}$  NMR (CDCl<sub>3</sub>, 101 MHz, ppm)  $\delta$  139.2, 138.5, 136.9, 135.5, 132.5, 130.1, 129.9, 128.8, 128.4 (q,  $J = 32.5$  Hz), 127.8, 127.6, 126.4, 125.6 (q,  $J = 3.8$  Hz), 124.6 (q,  $J = 272.8$  Hz), 122.4, 120.6, 119.0, 113.3, 111.0, 33.6, 20.4.  $^{19}\text{F}$  NMR (CDCl<sub>3</sub>, 376 MHz, ppm)  $\delta$  -62.2. (s, 3F). HRMS (ESI)  $m/z$ : [M+Na]<sup>+</sup> calcd for C<sub>25</sub>H<sub>20</sub>F<sub>3</sub>NNa: 414.1440. Found 414.1443.

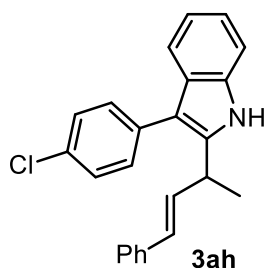

The reaction of **1a** (19.6 mg, 0.15 mmol) and **2n** (22.8 mg, 0.10 mmol) was stirred in a 40 °C oil bath under argon for 3 h. Compound **3ah** was isolated by flash column chromatography (SiO<sub>2</sub>, PE/EA = 80:1, v/v) in 80% yield (28.5 mg) as yellow oil,  $R_f = 0.36$  (silica gel, PE/EA = 15:1).  $^1\text{H}$  NMR (CDCl<sub>3</sub>, 400 MHz, ppm)  $\delta$  8.04 (s, 1H), 7.59 (d,  $J = 7.6$  Hz, 1H), 7.49 – 7.40 (m, 4H), 7.38 – 7.27 (m, 5H), 7.25 – 7.17 (m, 2H), 7.15 – 7.08 (m, 1H), 6.55 – 6.34 (m, 2H), 4.13 – 4.02 (m, 1H), 1.52 (d,  $J = 6.8$  Hz, 3H).  $^{13}\text{C}$  NMR (CDCl<sub>3</sub>, 101 MHz, ppm)  $\delta$  138.0, 137.0, 135.4, 133.8, 132.7, 132.1, 131.1, 130.0, 128.9, 128.8, 127.8, 127.7, 126.4, 122.2, 120.3, 119.0, 113.4, 110.9, 33.6, 20.3. HRMS (ESI)  $m/z$ : [M+Na]<sup>+</sup> calcd for C<sub>24</sub>H<sub>20</sub>ClNNa: 380.1176. Found 380.1181.

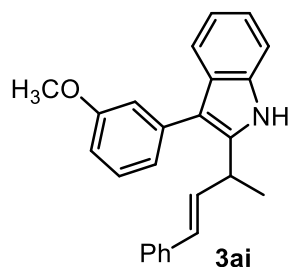

The reaction of **1a** (19.6 mg, 0.15 mmol) and **2o** (22.3 mg, 0.10 mmol) was stirred in

a 40 °C oil bath under argon for 8 h. Compound **3ai** was isolated by flash column chromatography (SiO<sub>2</sub>, PE/EA = 80:1~50:1, v/v) in 77% yield (27.2 mg) as yellow oil, *R<sub>f</sub>* = 0.33 (silica gel, PE/EA = 15:1). **<sup>1</sup>H NMR** (CDCl<sub>3</sub>, 400 MHz, ppm) δ 8.04 (s, 1H), 7.68 (d, *J* = 8.0 Hz, 1H), 7.40 – 7.32 (m, 4H), 7.31 – 7.25 (m, 2H), 7.24 – 7.16 (m, 2H), 7.15 – 7.07 (m, 3H), 6.88 (dd, *J* = 8.0, 2.0 Hz, 1H), 6.57 – 6.37 (m, 2H), 4.23 – 4.08 (m, 1H), 3.83 (s, 3H), 1.52 (d, *J* = 6.8 Hz, 3H). **<sup>13</sup>C NMR** (CDCl<sub>3</sub>, 101 MHz, ppm) δ 159.9, 137.9, 137.1, 136.7, 135.5, 132.9, 129.8, 129.6, 128.7, 127.9, 127.6, 126.3, 122.3, 122.0, 120.2, 119.4, 115.3, 114.4, 111.9, 110.8, 55.4, 33.6, 20.3. **HRMS** (ESI) *m/z*: [M+Na]<sup>+</sup> calcd for C<sub>25</sub>H<sub>23</sub>NONa: 376.1672. Found 376.1674.

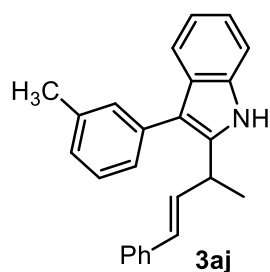

The reaction of **1a** (19.6 mg, 0.15 mmol) and **2p** (20.7 mg, 0.10 mmol) was stirred in a 40 °C oil bath under argon for 3 h. Compound **3aj** was isolated by flash column chromatography (SiO<sub>2</sub>, PE/EA = 80:1, v/v) in 60% yield (20.2 mg) as yellow oil, *R<sub>f</sub>* = 0.53 (silica gel, PE/EA = 15:1). **<sup>1</sup>H NMR** (CDCl<sub>3</sub>, 400 MHz, ppm) δ 8.00 (s, 1H), 7.65 (d, *J* = 8.0 Hz, 1H), 7.38 – 7.27 (m, 8H), 7.24 – 7.17 (m, 2H), 7.17 – 7.08 (m, 2H), 6.56 – 6.35 (m, 2H), 4.20 – 4.08 (m, 1H), 2.42 (s, 3H), 1.52 (d, *J* = 7.2 Hz, 3H). **<sup>13</sup>C NMR** (CDCl<sub>3</sub>, 101 MHz, ppm) δ 138.2, 137.7, 137.2, 135.5, 135.2, 133.0, 130.6, 129.7, 128.7, 128.6, 128.1, 127.6, 127.1, 126.9, 126.4, 122.0, 120.1, 119.4, 114.6, 110.8, 33.6, 21.8, 20.4. **HRMS** (ESI) *m/z*: [M+Na]<sup>+</sup> calcd for C<sub>25</sub>H<sub>23</sub>NNa: 360.1723. Found 360.1726.



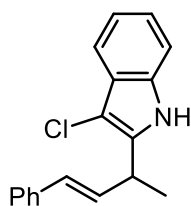

**3ak**

The reaction of **1a** (19.6 mg, 0.15 mmol) and **2q** (15.2 mg, 0.10 mmol) was stirred in a 40 °C oil bath under argon for 4 h. Compound **3ak** was isolated by flash column chromatography (SiO<sub>2</sub>, PE/EA = 80:1, v/v) in 52% yield (14.4 mg) as yellow oil, *R<sub>f</sub>* = 0.36 (silica gel, PE/EA = 15:1). **<sup>1</sup>H NMR** (CDCl<sub>3</sub>, 400 MHz, ppm) δ 7.93 (s, 1H), 7.66 – 7.52 (m, 1H), 7.38 (d, *J* = 7.3 Hz, 2H), 7.35 – 7.27 (m, 3H), 7.27 – 7.22 (m, 1H), 7.21 – 7.13 (m, 2H), 6.52 (d, *J* = 16.0 Hz, 1H), 6.42 (dd, *J* = 16.0, 5.2 Hz, 1H), 4.20 – 4.10 (m, 1H), 1.56 (d, *J* = 7.2 Hz, 3H). **<sup>13</sup>C NMR** (CDCl<sub>3</sub>, 101 MHz, ppm) δ 137.0, 136.7, 134.2, 131.0, 130.5, 128.8, 127.8, 126.4, 122.6, 120.5, 117.9, 111.1, 33.6, 19.0. **HRMS** (ESI) *m/z*: [M+Na]<sup>+</sup> calcd for C<sub>18</sub>H<sub>16</sub>ClNNa: 304.0863. Found 304.0878.

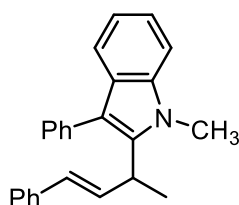

**3al**

The reaction of **1a** (19.6 mg, 0.15 mmol) and **2r** (20.7 mg, 0.10 mmol) was stirred in a 40 °C oil bath under argon for 22 h. Compound **3al** was isolated by flash column chromatography (SiO<sub>2</sub>, PE/EA = 120:1~100:1, v/v) in 31% yield (10.6 mg) as yellow oil, *R<sub>f</sub>* = 0.57 (silica gel, PE/EA = 15:1). When HFIP (10.7 μL, 0.10 mmol) was used as the additive, the compound **3al** was isolated in 47% yield (15.7 mg). **<sup>1</sup>H NMR** (CDCl<sub>3</sub>, 400 MHz, ppm) δ 7.60 (d, *J* = 7.6 Hz, 1H), 7.52 – 7.41 (m, 4H), 7.38 – 7.26 (m, 6H), 7.25 – 7.18 (m, 2H), 7.12 (t, *J* = 7.4 Hz, 1H), 6.49 (dd, *J* = 16.4, 4.4 Hz, 1H), 6.36 (dd, *J* = 16.0, 2.0 Hz, 1H), 4.39 – 4.21 (m, 1H), 3.78 (s, 3H), 1.57 (d, *J* = 7.6 Hz, 3H). **<sup>13</sup>C NMR** (CDCl<sub>3</sub>, 101 MHz, ppm) δ 138.8, 137.3, 137.3, 135.8, 133.0, 130.4,

129.7, 128.7, 128.5, 127.5, 127.4, 126.3, 126.3, 121.7, 119.8, 119.3, 115.2, 108.9, 33.4, 31.4, 19.4. **HRMS** (ESI)  $m/z$ :  $[M+Na]^+$  calcd for  $C_{25}H_{23}NNa$ : 360.1723. Found 360.1727.

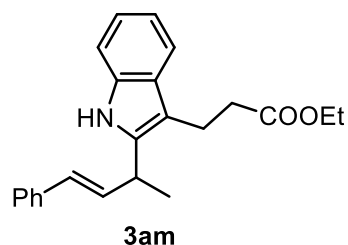

The reaction of **1a** (19.6 mg, 0.15 mmol) and **2s** (21.7 mg, 0.10 mmol) was stirred in a 40 °C oil bath under argon for 22 h. Compound **3am** was isolated by flash column chromatography ( $SiO_2$ , PE/EA = 50:1~35:1, v/v) in 20% yield (7.0 mg) as yellow oil,  $R_f$  = 0.24 (silica gel, PE/EA = 15:1). When HFIP (10.7  $\mu$ L, 0.10 mmol) was used as the additive, the compound **3am** was isolated in 32% yield (11.1 mg).  **$^1H$  NMR** ( $CDCl_3$ , 400 MHz, ppm)  $\delta$  7.85 (s, 1H), 7.55 (d,  $J$  = 7.6 Hz, 1H), 7.34 (d,  $J$  = 7.6 Hz, 2H), 7.32 – 7.26 (m, 3H), 7.25 – 7.18 (m, 1H), 7.16 – 7.06 (m, 2H), 6.51 – 6.36 (m, 2H), 4.22 – 3.98 (m, 3H), 3.10 (t,  $J$  = 7.8 Hz, 2H), 2.64 (t,  $J$  = 7.8 Hz, 2H), 1.52 (d,  $J$  = 7.2 Hz, 3H), 1.21 (t,  $J$  = 7.2 Hz, 3H).  **$^{13}C$  NMR** ( $CDCl_3$ , 101 MHz, ppm)  $\delta$  173.6, 137.6, 137.1, 135.5, 132.6, 129.6, 128.7, 128.3, 127.5, 126.3, 121.5, 119.4, 118.4, 110.7, 110.0, 60.5, 35.7, 33.5, 20.0, 19.8, 14.3. **HRMS** (ESI)  $m/z$ :  $[M+Na]^+$  calcd for  $C_{23}H_{25}NNaO_2$ : 370.1777. Found 370.1777.

## 5. Gram-scale reaction and mechanistic study

### 5.1 Gram scale experiment

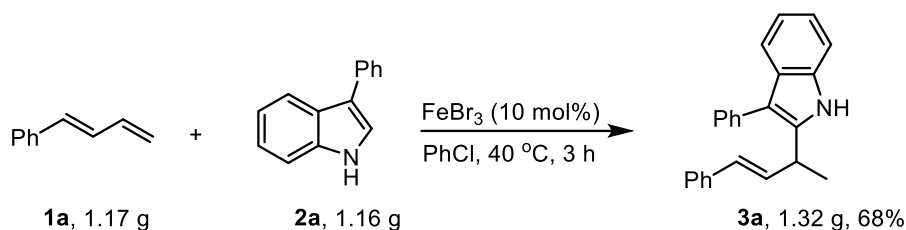

In Ar-filled glove box, the FeBr<sub>3</sub> (177.3 mg, 0.6 mmol, 0.1 equiv) was added to the oven-dried reaction tube with a dried stir bar. The tube was capped, then it was transferred out of the glovebox. 3-phenylindole **2a** (1.16 g, 6 mmol, 1.0 equiv) was added to this oven-dried reaction tube, 1-phenyl-1,3-butadiene **1a** (1.17 g, 9 mmol, 1.5 equiv) was added with PhCl (120 mL). After all reagents were added, the reaction tube was replaced with argon three times, and then sealed. The reaction mixture was stirred in a 40 °C oil bath under argon for 3 h (monitored by TLC). After the reaction was completed, the solvent was removed under vacuum, and the residue was purified by column chromatography on silica gel with a gradient eluent of PE/EA = 80:1 to give the desired product **3a** in 68% yield (1.32 g) as yellow solid.

### 5.2 Control experiment

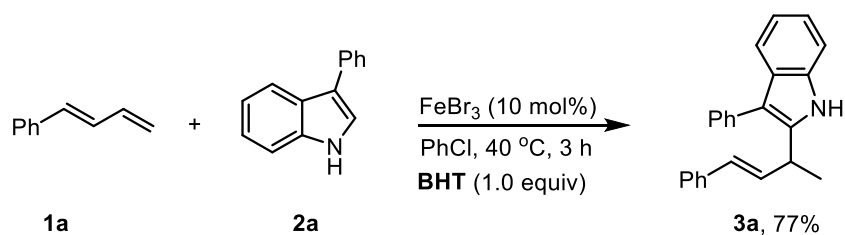

In Ar-filled glove box, the FeBr<sub>3</sub> (3.0 mg, 0.01 mmol, 0.1 equiv) was added to the oven-dried reaction tube with a dried stir bar. The tube was capped, then it was transferred out of the glovebox. 3-phenylindole **2a** (19.4 mg, 0.10 mmol, 1.0 equiv) and BHT (22.0 mg, 0.10 mmol, 1.0 equiv) were added to this oven-dried reaction tube, 1-phenyl-1,3-butadiene **1a** (19.6 mg, 0.15 mmol, 1.5 equiv) was added with PhCl (2 mL). After all reagents were added, the reaction tube was replaced with argon three times, and then sealed. The reaction mixture was stirred in a 40 °C oil bath under argon for 3 h (monitored by TLC). After the reaction was completed, the solvent was

removed under vacuum, and the residue was purified by column chromatography on silica gel with a gradient eluent of PE/EA = 80:1 to give the desired product **3a** in 77% yield (24.7 mg) as yellow solid.

### 5.3 The investigation of some alcohols

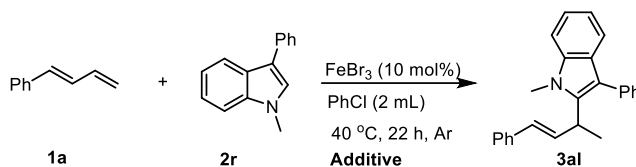

| entry | additive                                    | yield (%) |
|-------|---------------------------------------------|-----------|
| 1     | no                                          | 31        |
| 2     | ( <i>R</i> )-1,1'-bi-2-naphthol (0.1 equiv) | 31        |
| 3     | ( <i>R</i> )-1,1'-bi-2-naphthol (0.5 equiv) | 20        |
| 4     | ( <i>R</i> )-1,1'-bi-2-naphthol (1.0 equiv) | 19        |
| 5     | ( <i>R</i> )-1,1'-bi-2-naphthol (2.0 equiv) | 20        |
| 6     | 2,6-dimethylphenol (0.1 equiv)              | 12        |
| 7     | 2,6-dimethylphenol (1.0 equiv)              | 28        |
| 8     | Phenol (1.0 equiv)                          | 24        |
| 9     | <sup>t</sup> BuOH (0.1 equiv)               | 6         |
| 10    | <sup>t</sup> BuOH (1.0 equiv)               | 6         |
| 11    | <sup>t</sup> BuOH (2.0 equiv)               | 13        |
| 12    | <sup>t</sup> BuOH (5.0 equiv)               | 9         |
| 13    | <i>L</i> -menthol (1.0 equiv)               | 32        |
| 14    | <i>L</i> -menthol (2.0 equiv)               | 23        |
| 15    | <i>L</i> -menthol (5.0 equiv)               | 19        |
| 16    | <sup>i</sup> PrOH (1.0 equiv)               | 17        |
| 17    | <sup>i</sup> PrOH (2.0 equiv)               | 31        |
| 18    | <sup>i</sup> PrOH (5.0 equiv)               | trace     |

In Ar-filled glove box, the FeBr<sub>3</sub> (3.0 mg, 0.01 mmol, 0.1 equiv) was added to the oven-dried reaction tube with a dried stir bar. The tube was capped, then it was transferred out of the glovebox. N-Me-3-phenylindole **2r** (20.7 mg, 0.10 mmol, 1.0 equiv) and **additive** were added to this oven-dried reaction tube, 1-phenyl-1,3-butadiene **1a** (19.6 mg, 0.15 mmol, 1.5 equiv) was added with PhCl (2 mL). After all reagents were added, the reaction tube was replaced with argon three times, and then sealed. The reaction mixture was stirred in a 40 °C oil bath under argon for 22 h. The solvent was removed under vacuum, and the residue was purified by analytic TLC purification (SiO<sub>2</sub>, PE/EA = 15:1, v/v) to afford **3al**.

## 5.4 The cross-over experiments

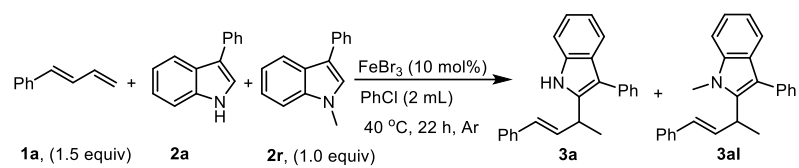

| entry | <b>2a</b> (equiv) | yield ( <b>3a</b> ) | yield ( <b>3al</b> ) |
|-------|-------------------|---------------------|----------------------|
| 1     | 1.0               | 83%                 | 15%                  |
| 2     | 0.1               | 12%                 | 31%                  |

In Ar-filled glove box, the FeBr<sub>3</sub> (3.0 mg, 0.01 mmol, 0.1 equiv) was added to the oven-dried reaction tube with a dried stir bar. The tube was capped, then it was transferred out of the glovebox. N-Me-3-phenylindole **2r** (20.7 mg, 0.10 mmol, 1.0 equiv) and 3-phenylindole **2a** (1.0 equiv or 0.1 equiv) were added to this oven-dried reaction tube, 1-phenyl-1,3-butadiene **1a** (19.6 mg, 0.15 mmol, 1.5 equiv) was added with PhCl (2 mL). After all reagents were added, the reaction tube was replaced with argon three times, and then sealed. The reaction mixture was stirred in a 40 °C oil bath under argon for 22 h. The solvent was removed under vacuum, and the residue was purified by analytic TLC purification (SiO<sub>2</sub>, PE/EA = 15:1, v/v) to afford **3a** and **3al**.

## References

- (1) (a) A. Bhowmik and R. A. Fernandes, *Org. Lett.* 2019, **21**, 9203–9207. (b) D.-W. Ji, G.-C. He, W.-S. Zhang, C.-Y. Zhao, Y.-C. Hu and Q.-A. Chen, *Chem. Commun.*, 2020, **56**, 7431-7434. (c) G. Kumar, Z.-W. Qu, S. Ghosh, S. Grimme and I. Chatterjee, *ACS Catal.*, 2019, **9**, 11627-11633. (d) D. A. Mundal, K. E Lutz, and R. J. Thomson, *Org. Lett.* 2009, **11**, 465. (e) H. T. Dang, V. D. Nguyen, H. H. Pham, H. D. Arman and O. V. Larionov, *Tetrahedron* 2019, **75**, 3258-3264. (f) D. Fiorito, S. Folliet, Y. Liu and C. Mazet, *ACS Catal.* 2018, **8**, 1392–1398. (g) H. Chen, D. Anand and L. Zhou, *Asian J. Org. Chem.* 2019, **8**, 661–664. (h) H. Wang, C.-F. Liu, T.-D. Tan, K. R. B. Khoo and M. J. Koh, *ACS Catal.* 2022, **12**, 724–732.
- (2) (a) L. Bering, F. M. Paulussen and A. P. Antonchick, *Org. Lett.* 2018, **20**, 1978–1981. (b) F. Jiang, K.-W. Chen, P. Wu, Y.-C. Zhang, Y. Jiao and F. Shi, *Angew. Chem. Int. Ed.* 2019, **58**, 15104-15110. (c) Y. Chen, S. Guo, K. Li, J. Qu, H. Yuan, Q. Hua and B. Chen, *Adv. Synth. Catal.* 2013, **355**, 711-715. (d) H. Yuan, L. Guo, F. Liu, Z. Miao, L. Feng and H. Gao, *ACS Catal.* 2019, **9**, 3906–3912. (e) C. A. Kuttruff, H. Zipse and D. Trauner, *Angew. Chem. Int. Ed.* 2011, **50**, 1402-1405. (f) R. B. Bedford, N. Fey, M. F. Haddow and R. F. Sankey, *Chem. Commun.*, 2011, **47**, 3649-3651. (g) S. Rapolu, M. Alla, V. R. Bommena, R. Murthy, J. N. Jain, V. R. Bommareddy and M. R. Bommineni, *Eur. J. Med. Chem.* 2013, **66**, 91–100. (h) S. Rapolu, M. Alla, V. R. Bommena, R. Murthy, N. Jain, V. R. Bommareddy and M. R. Bommineni, *Eur. J. Med. Chem.* 2013, **66**, 91–100.

## Copies of NMR Spectra

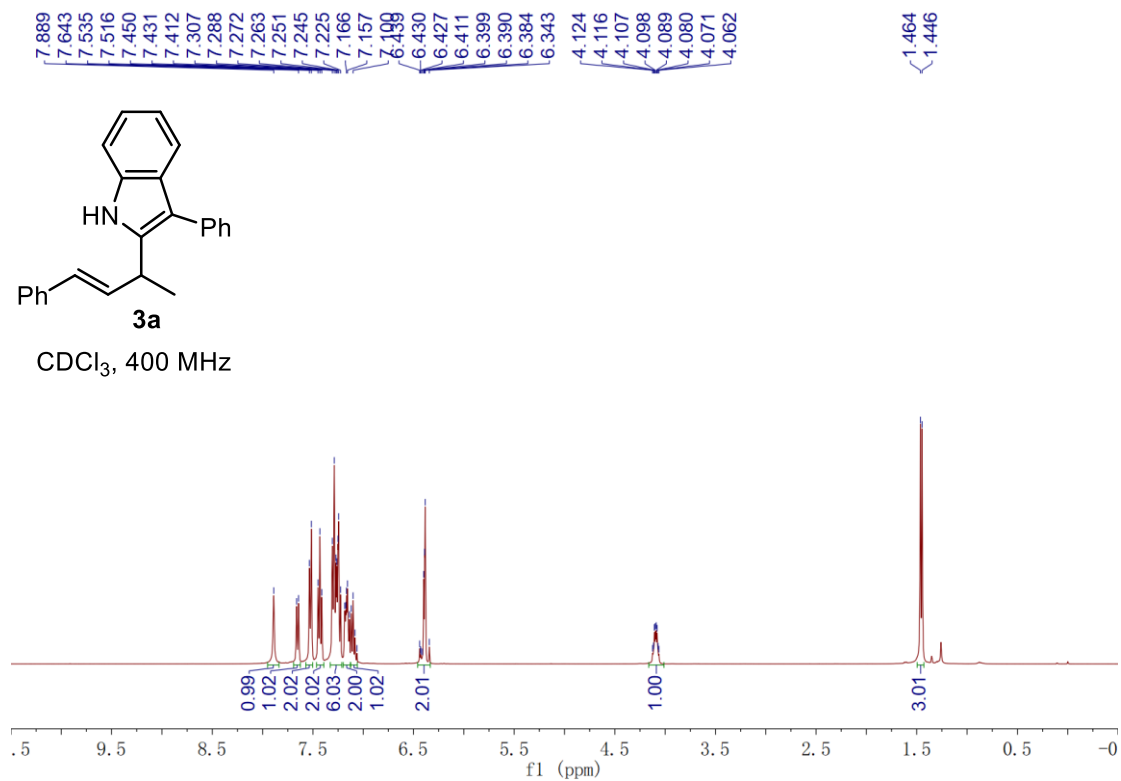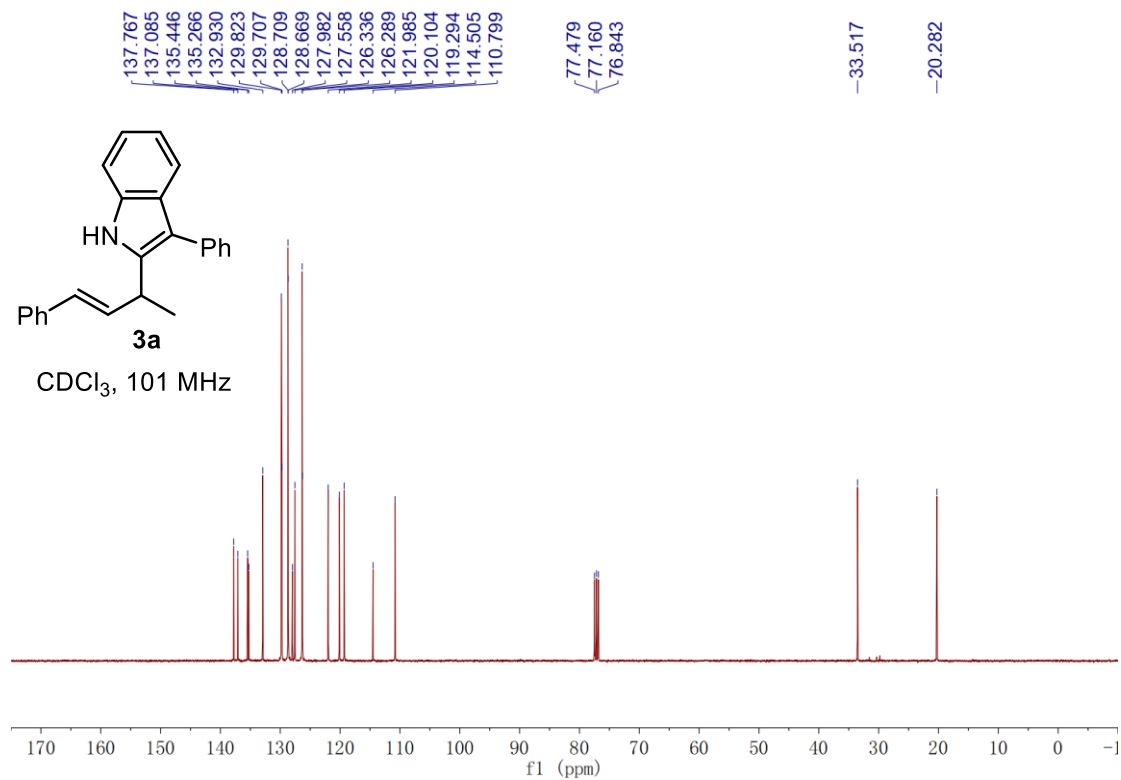

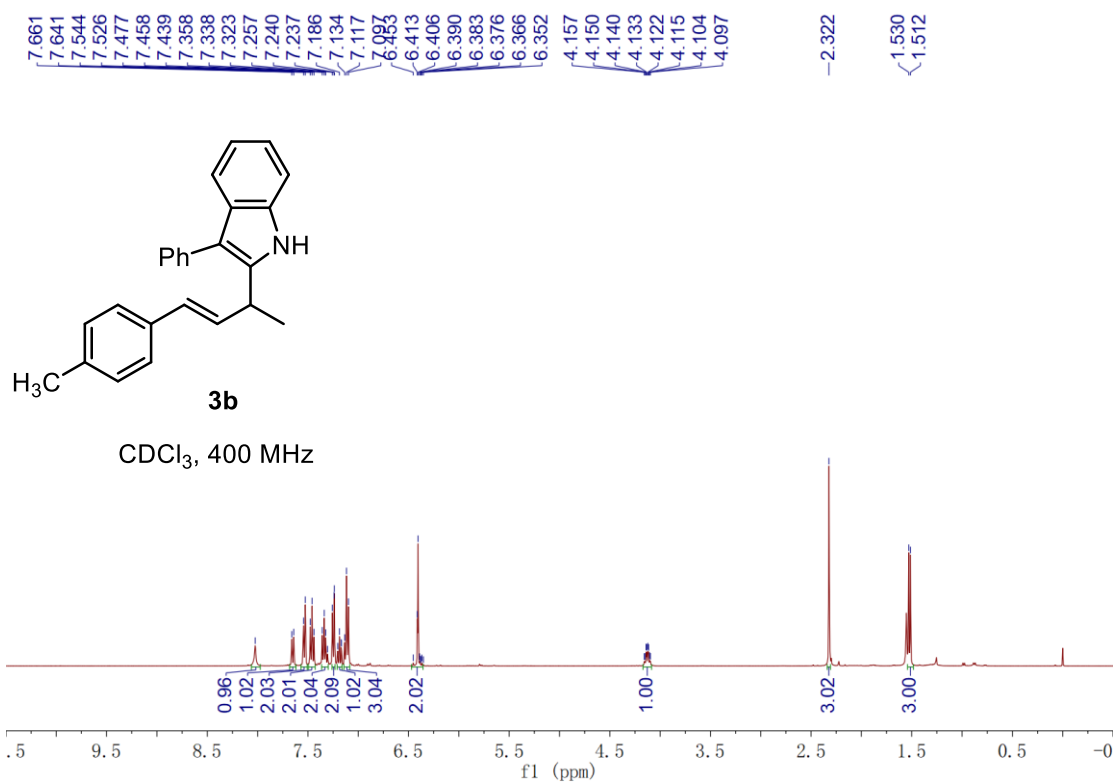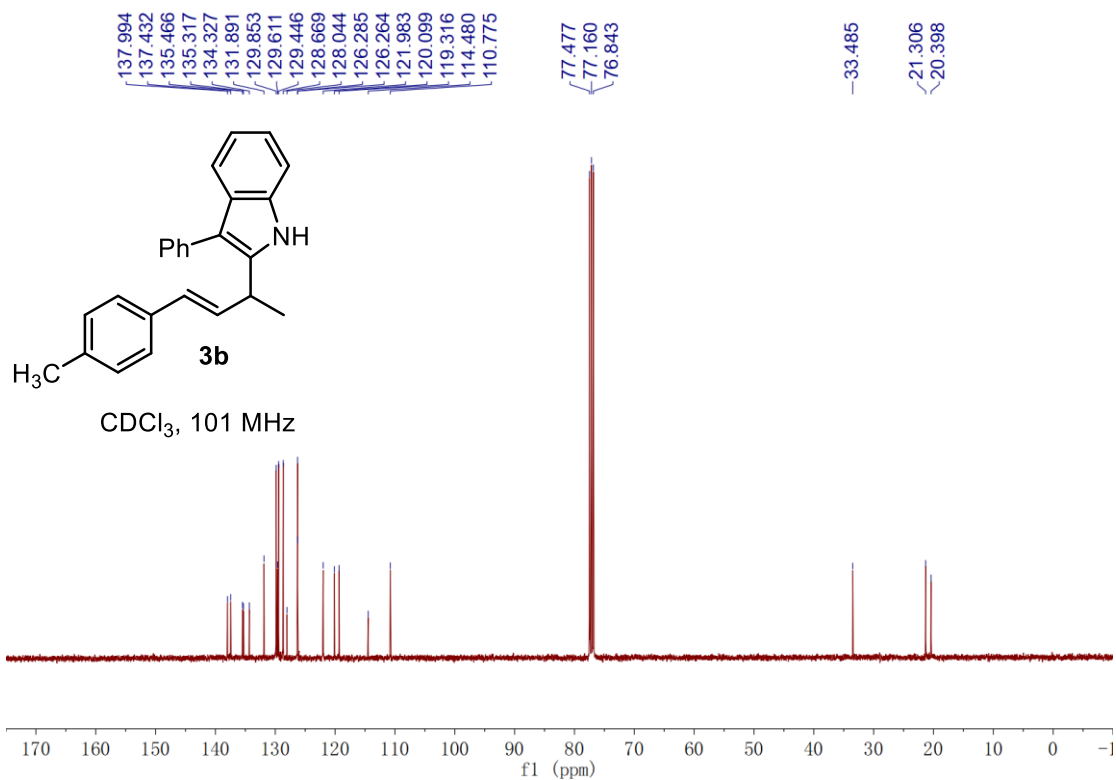



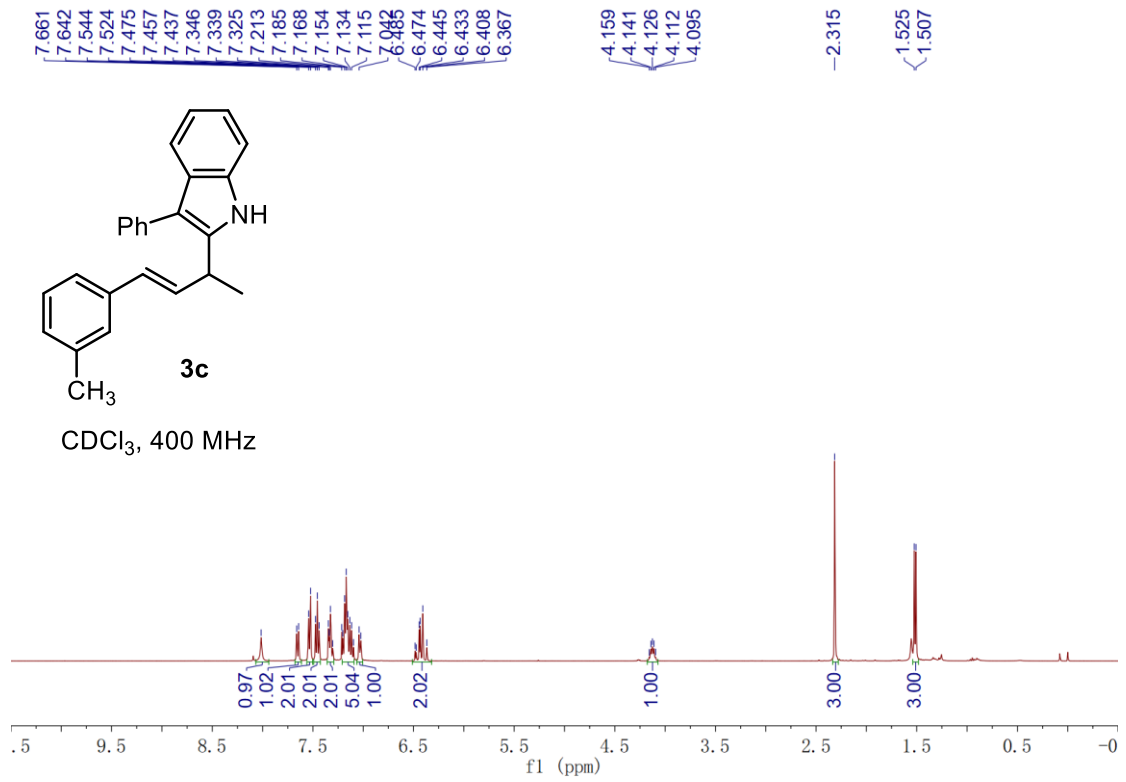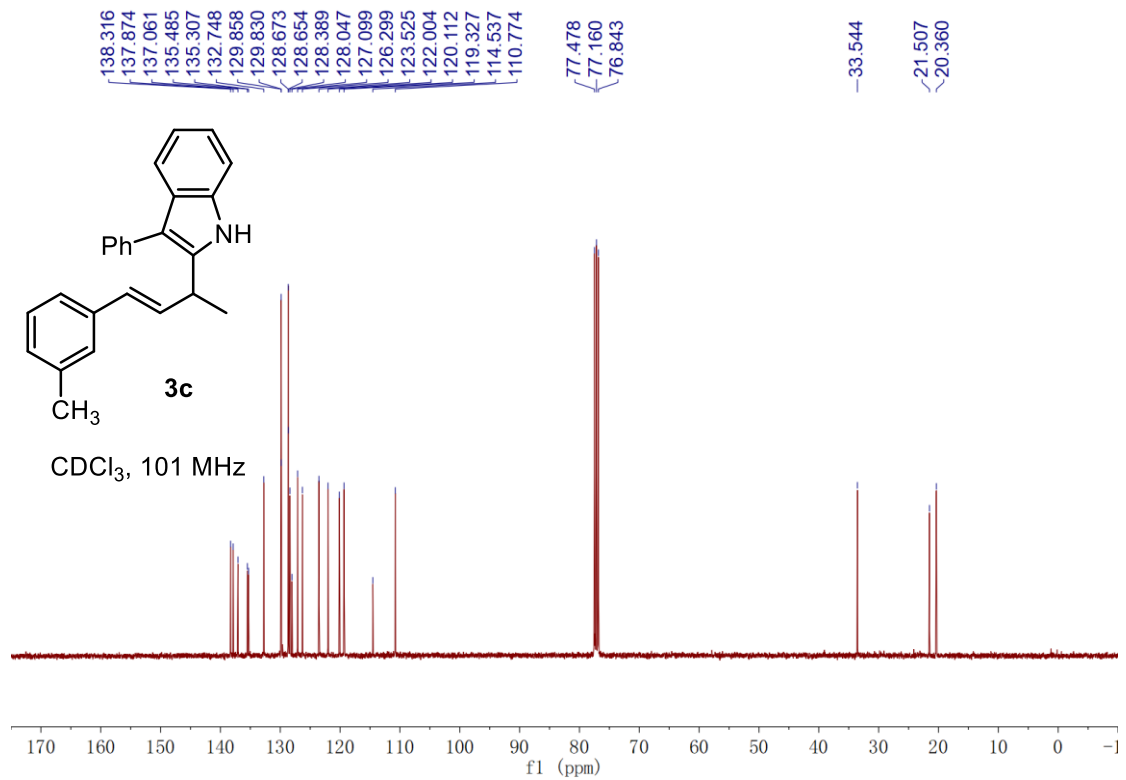

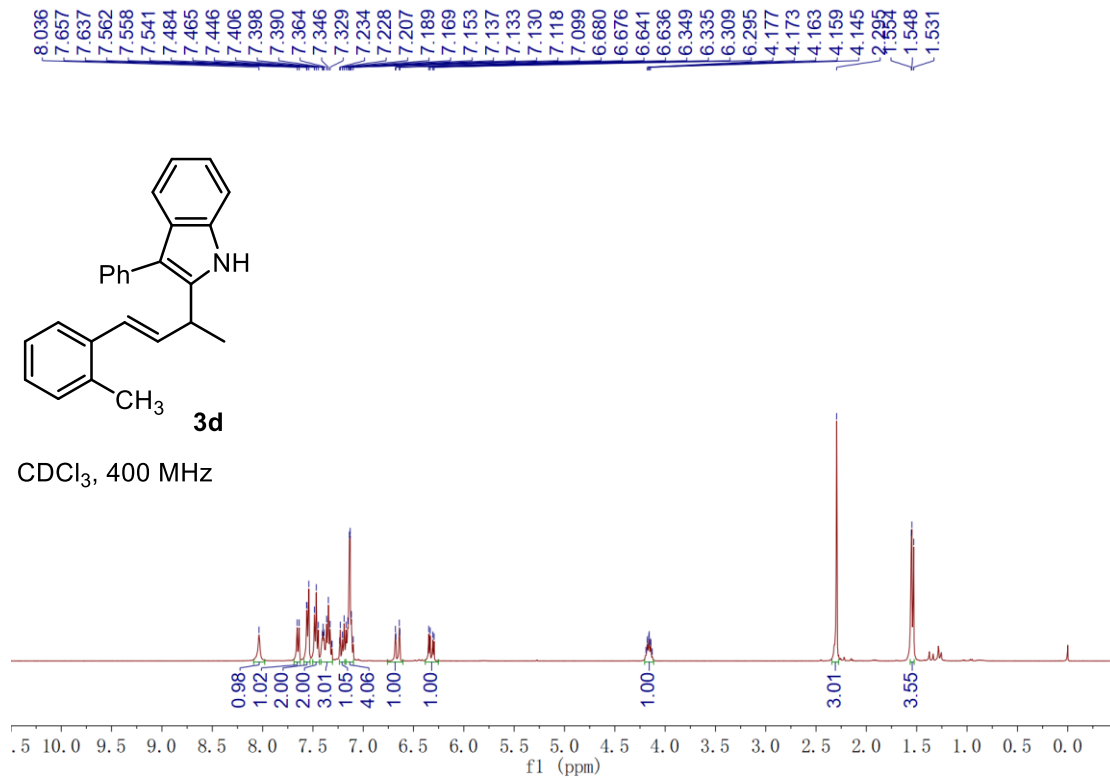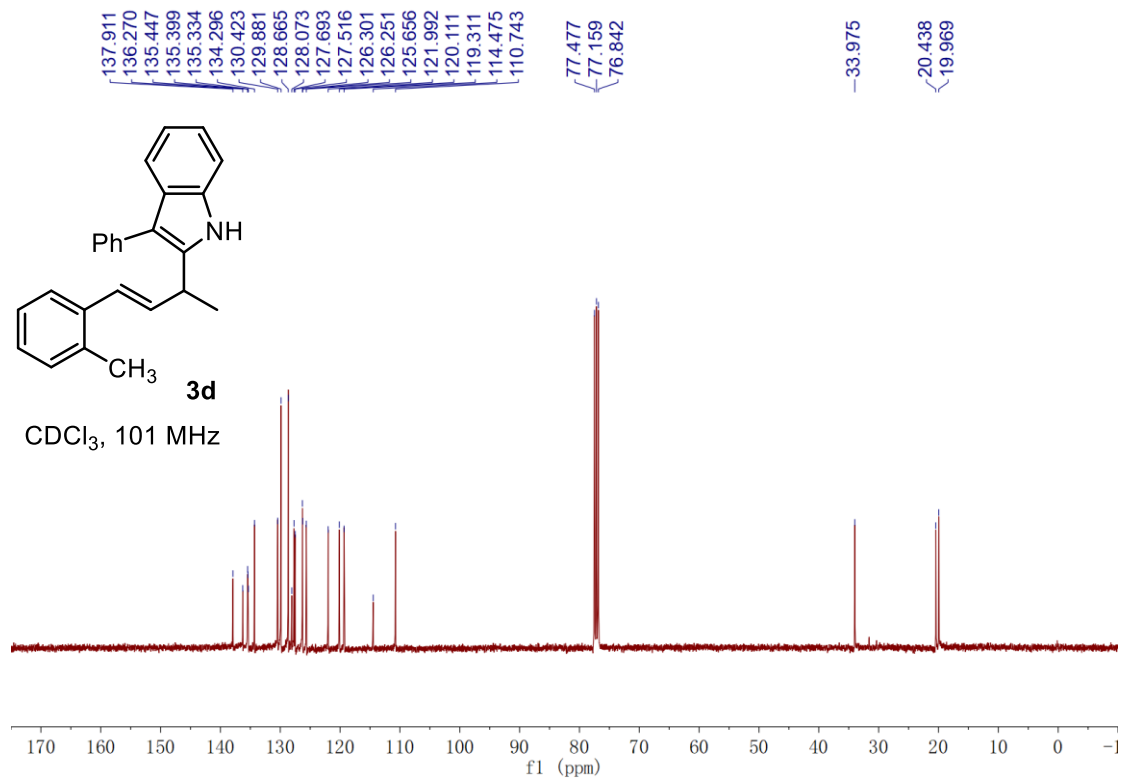

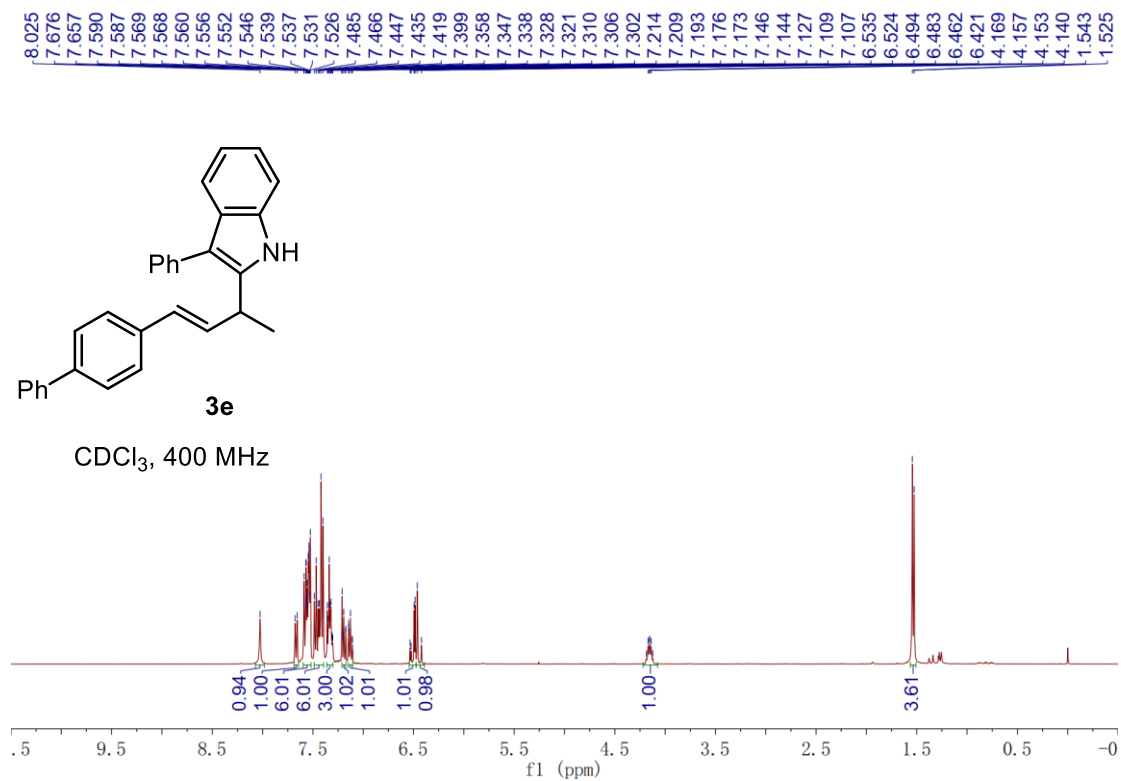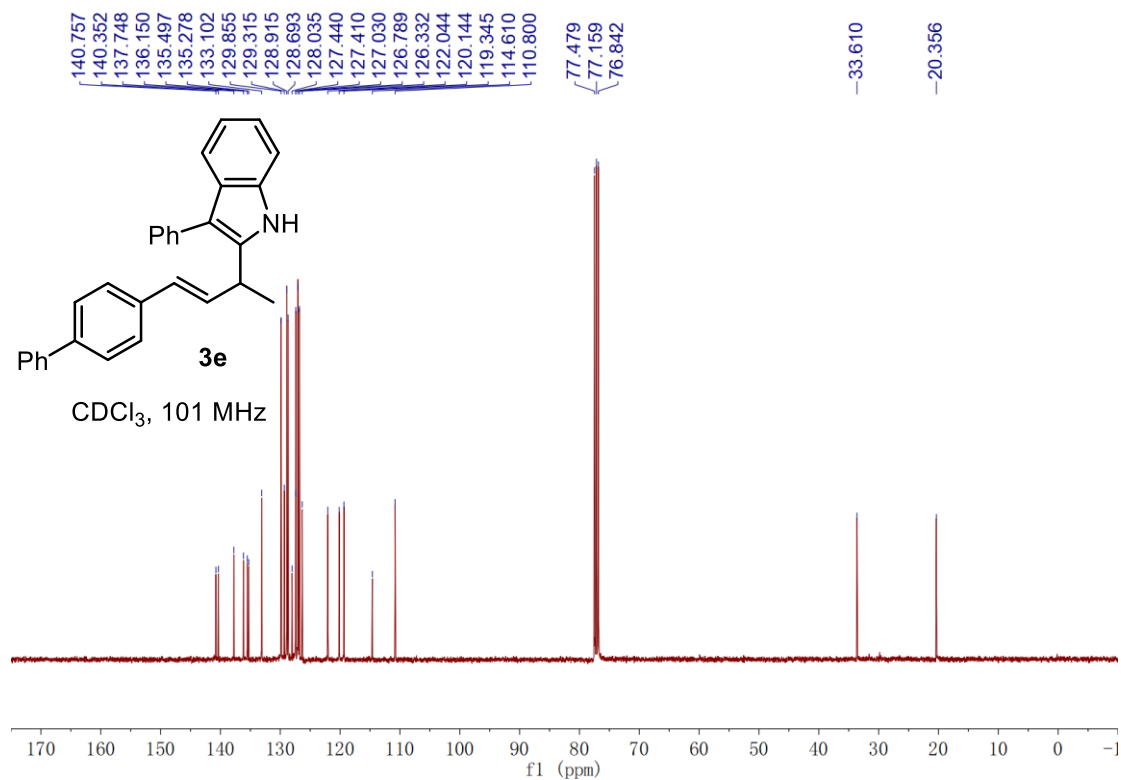

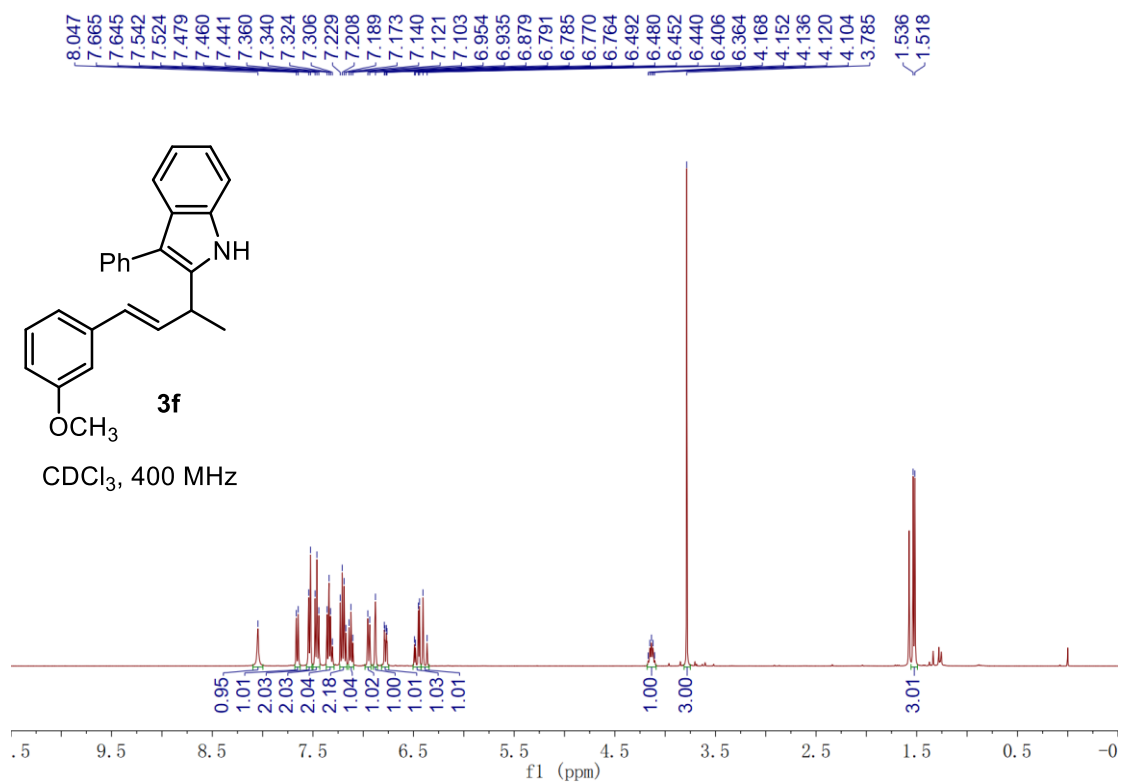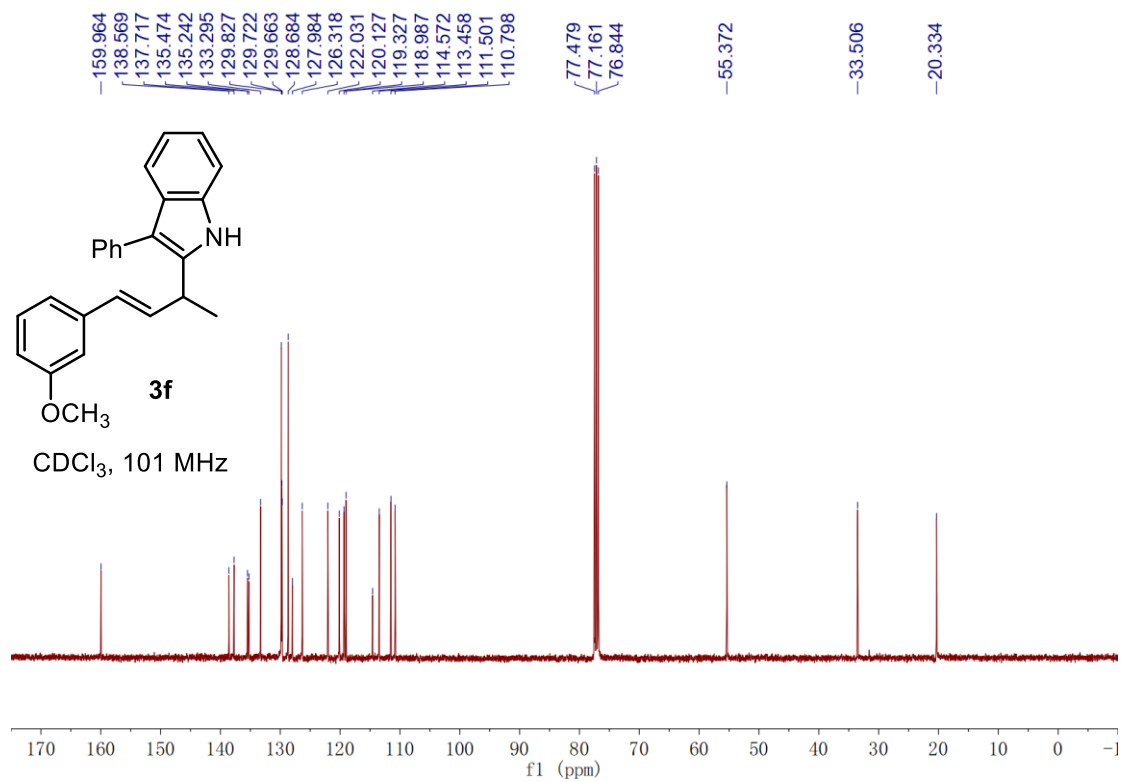



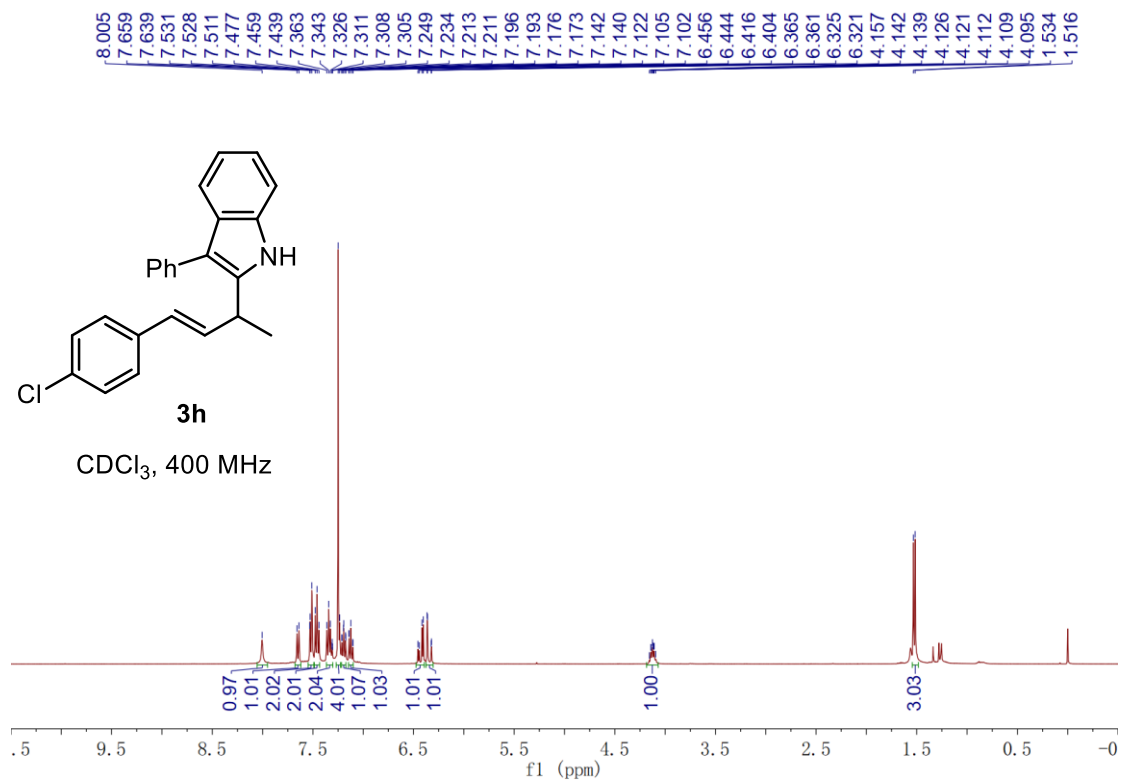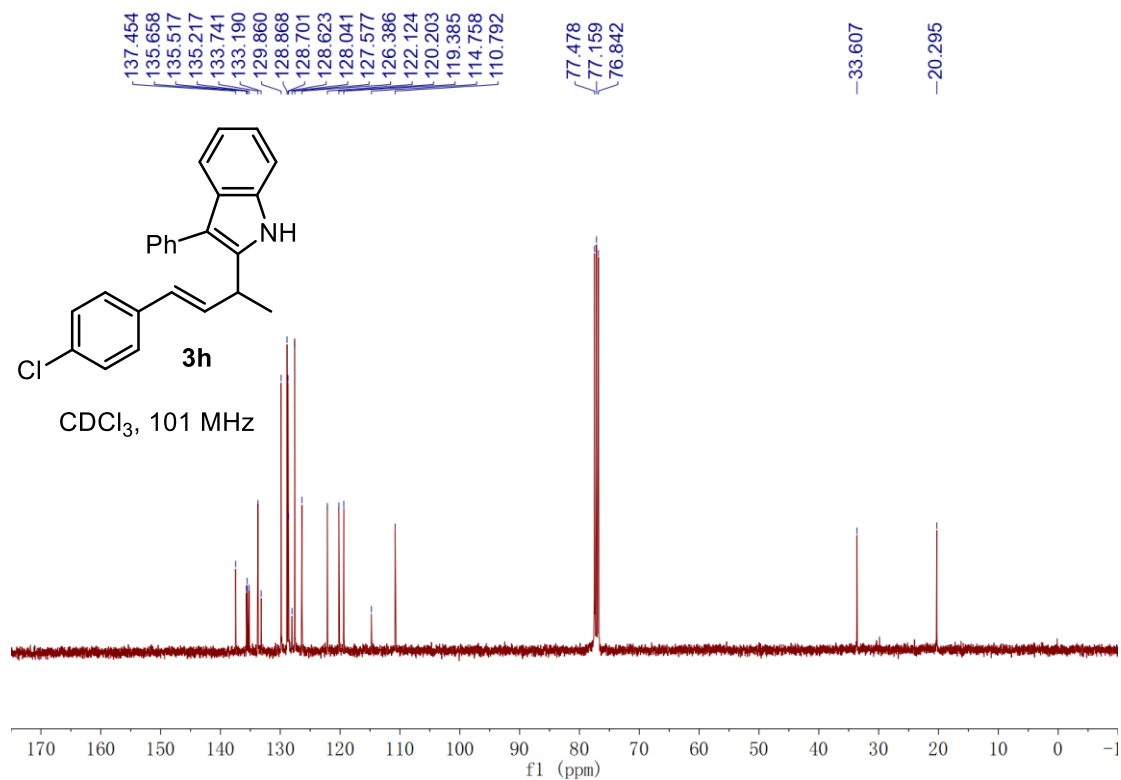

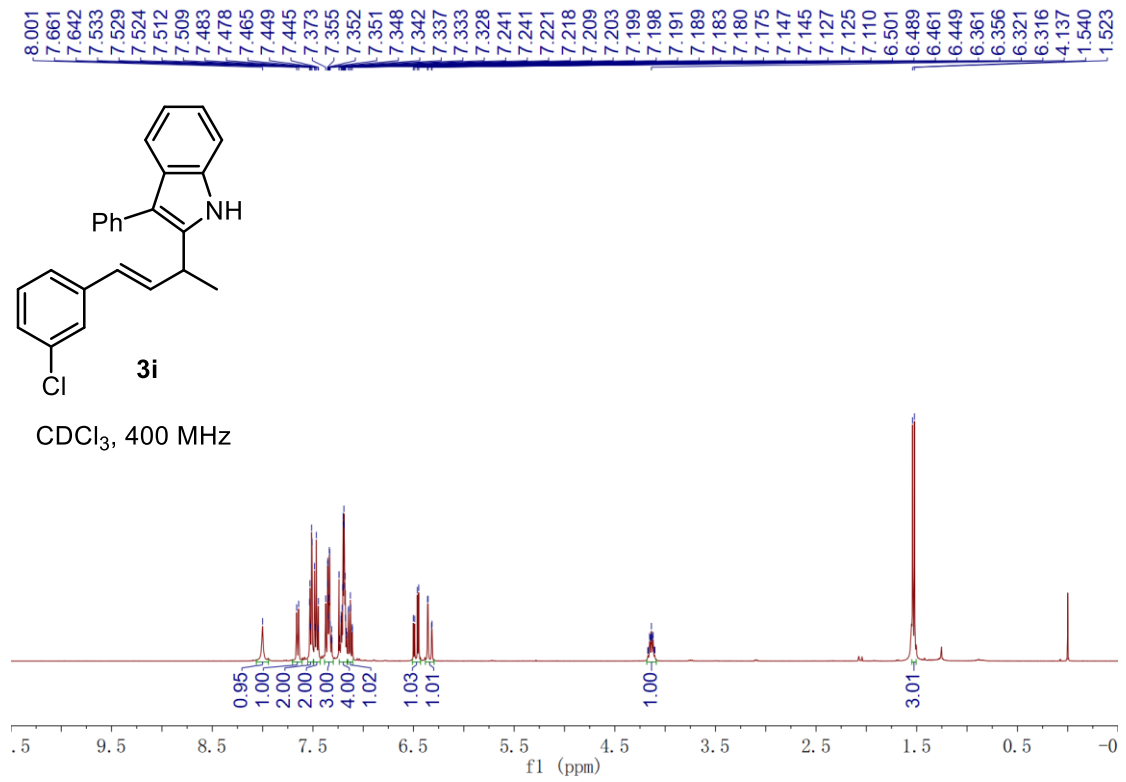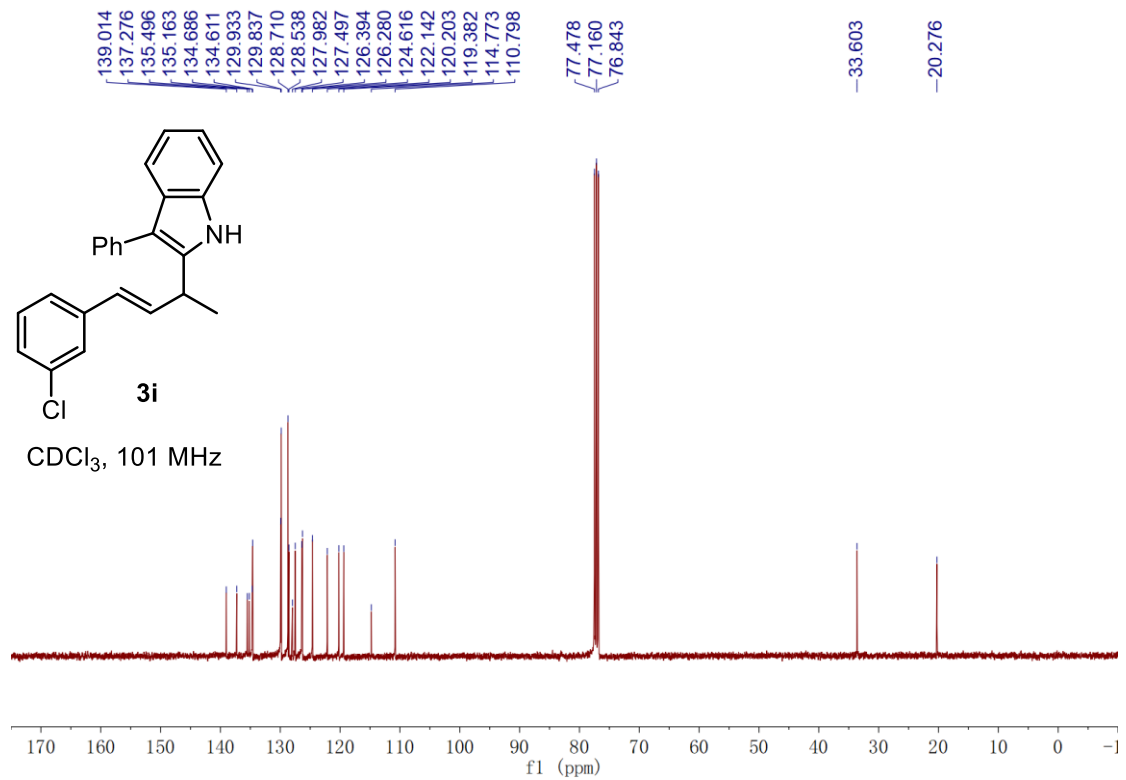





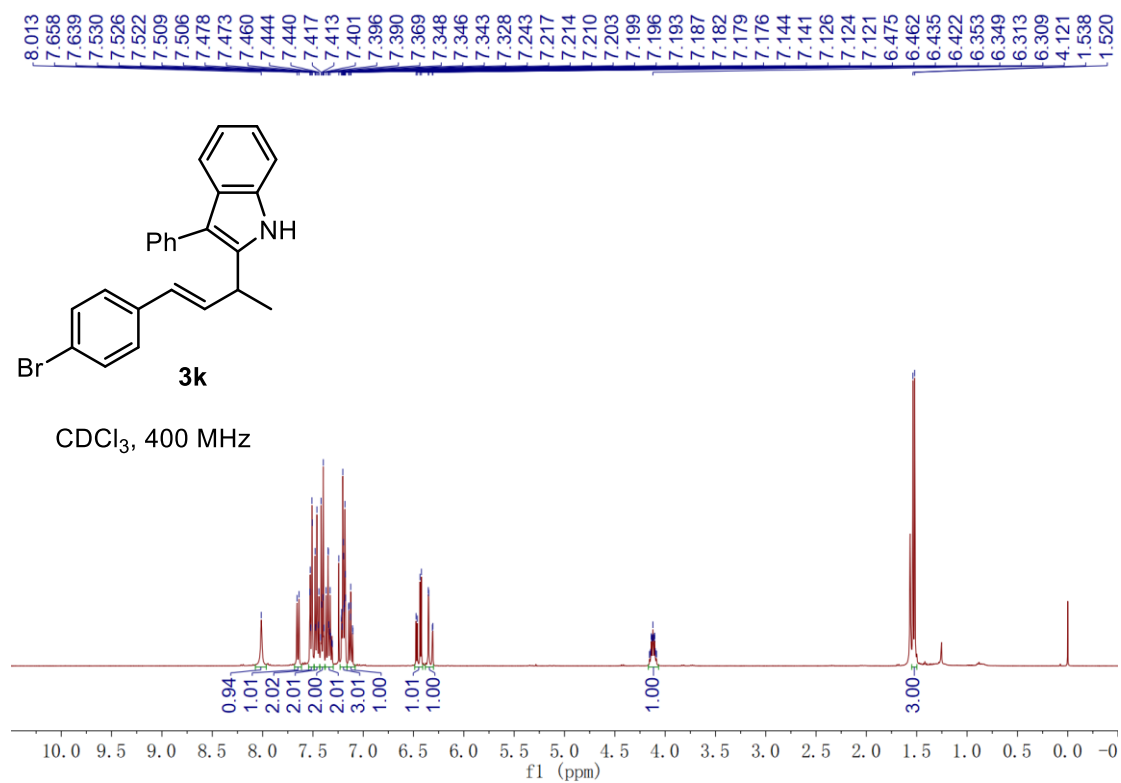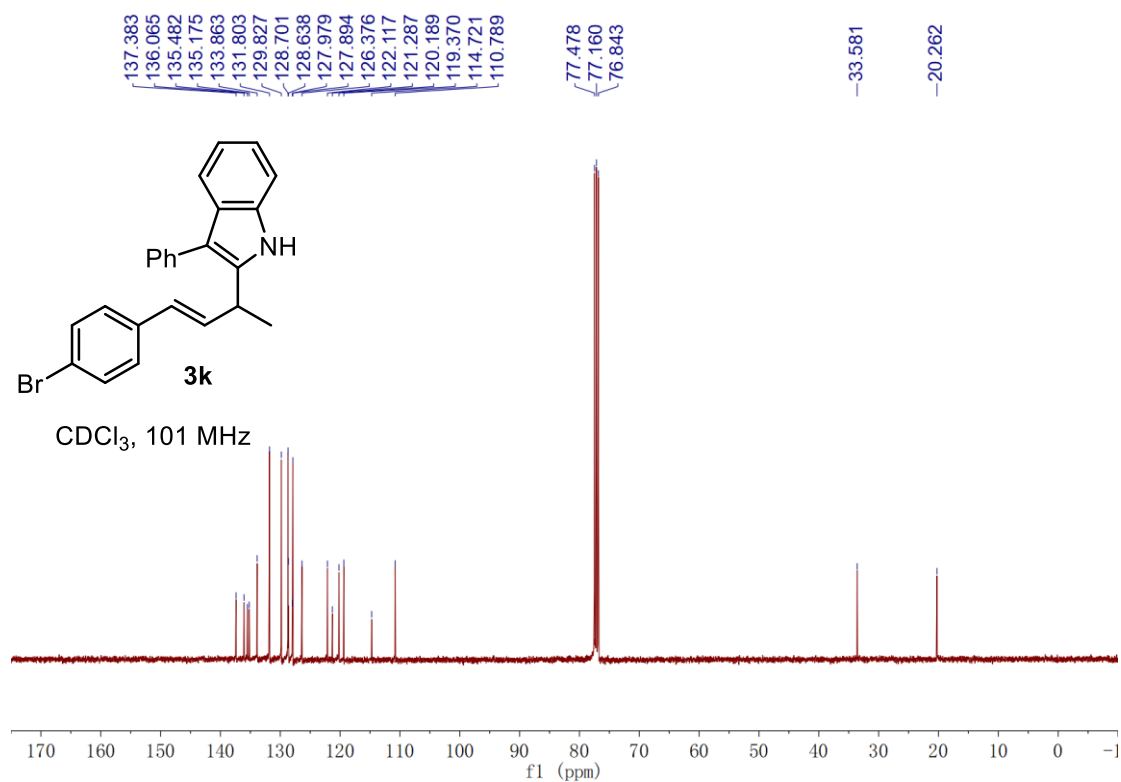

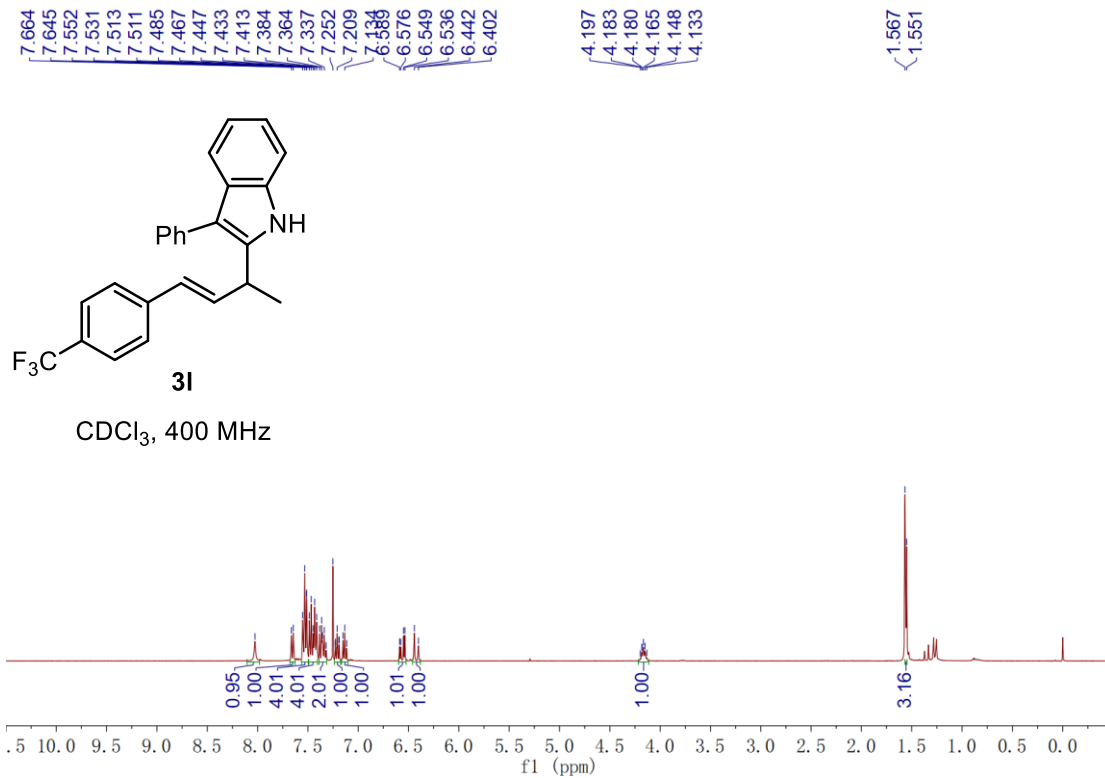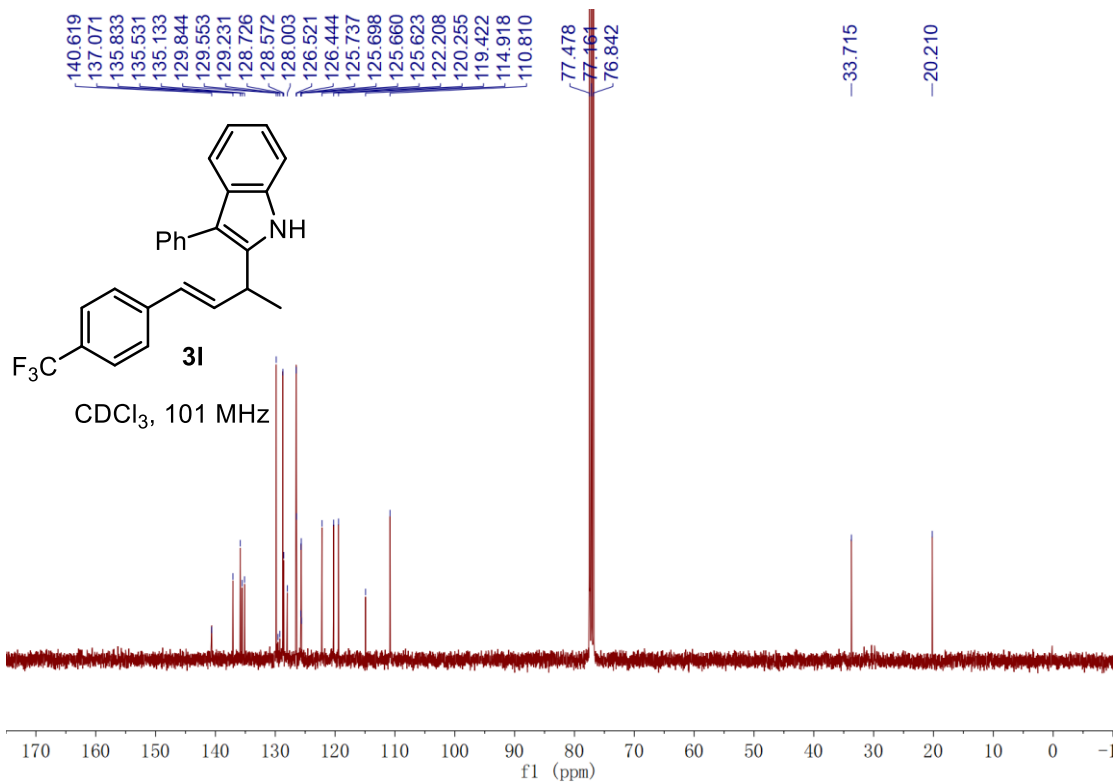

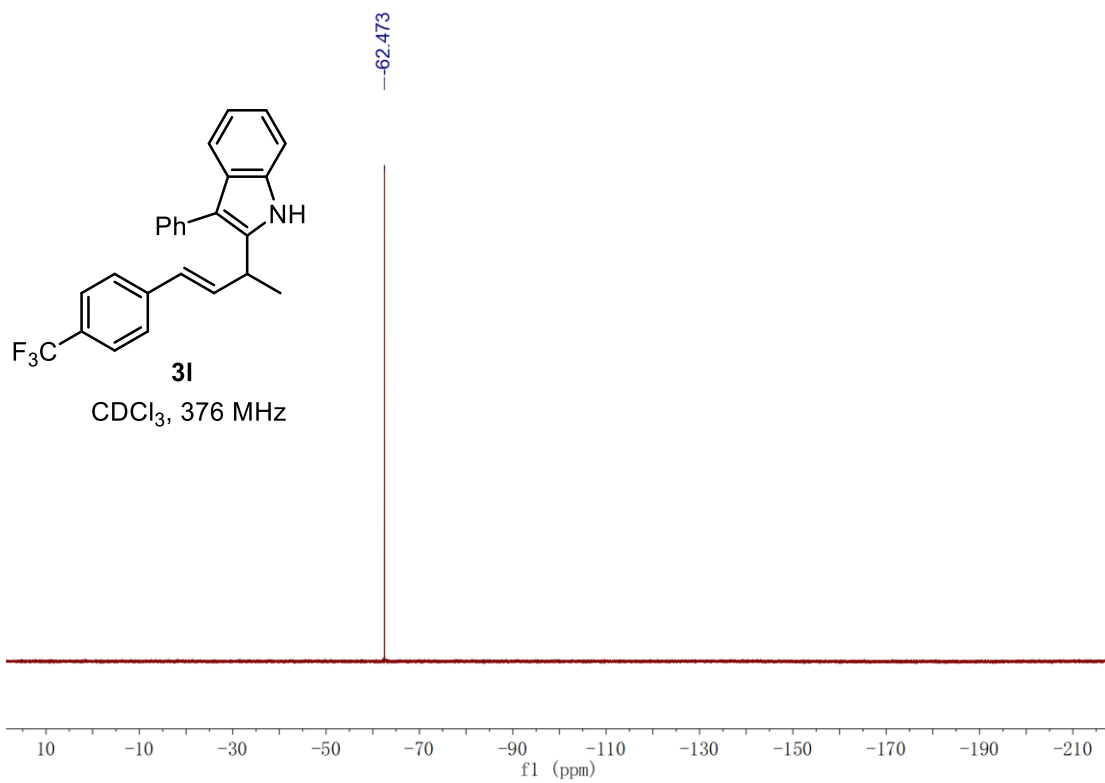

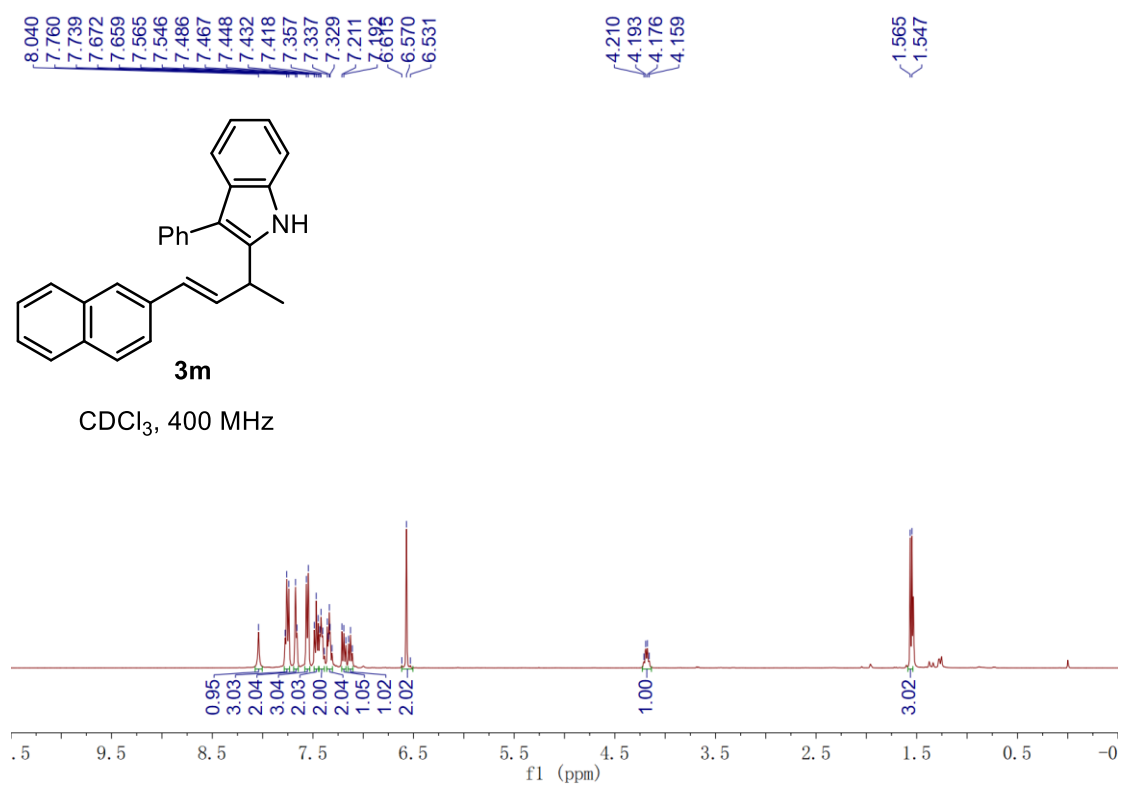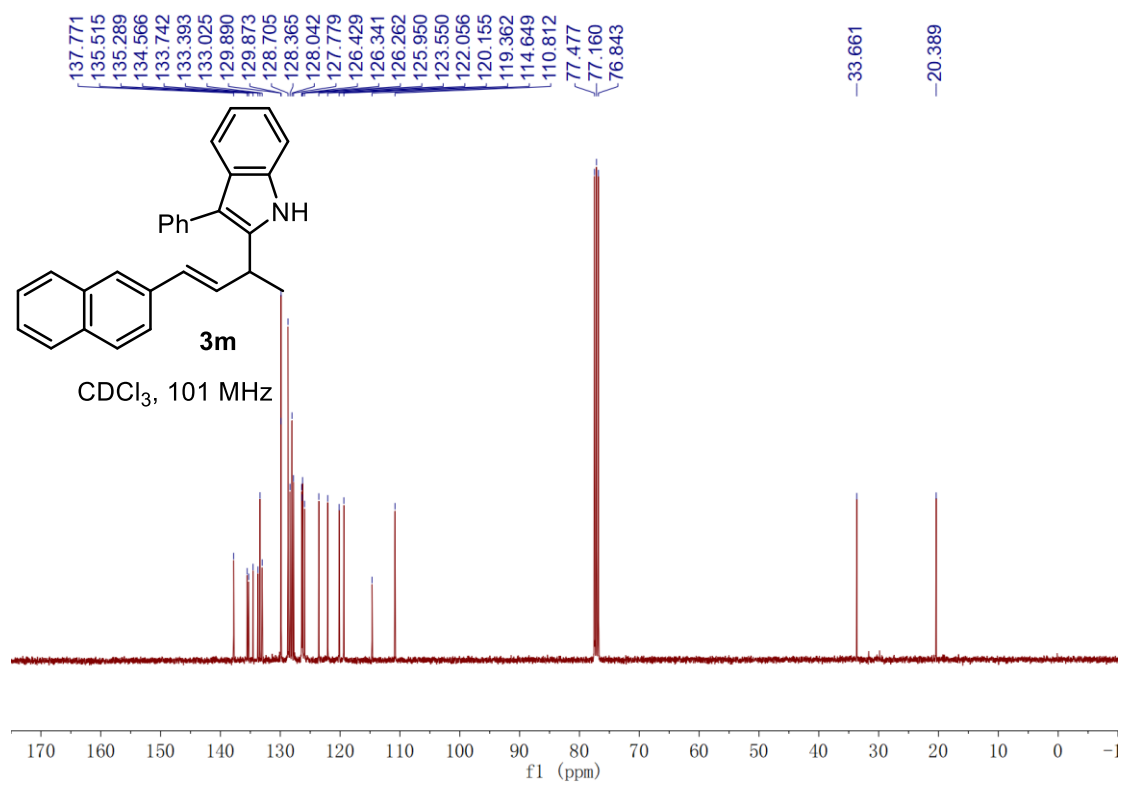

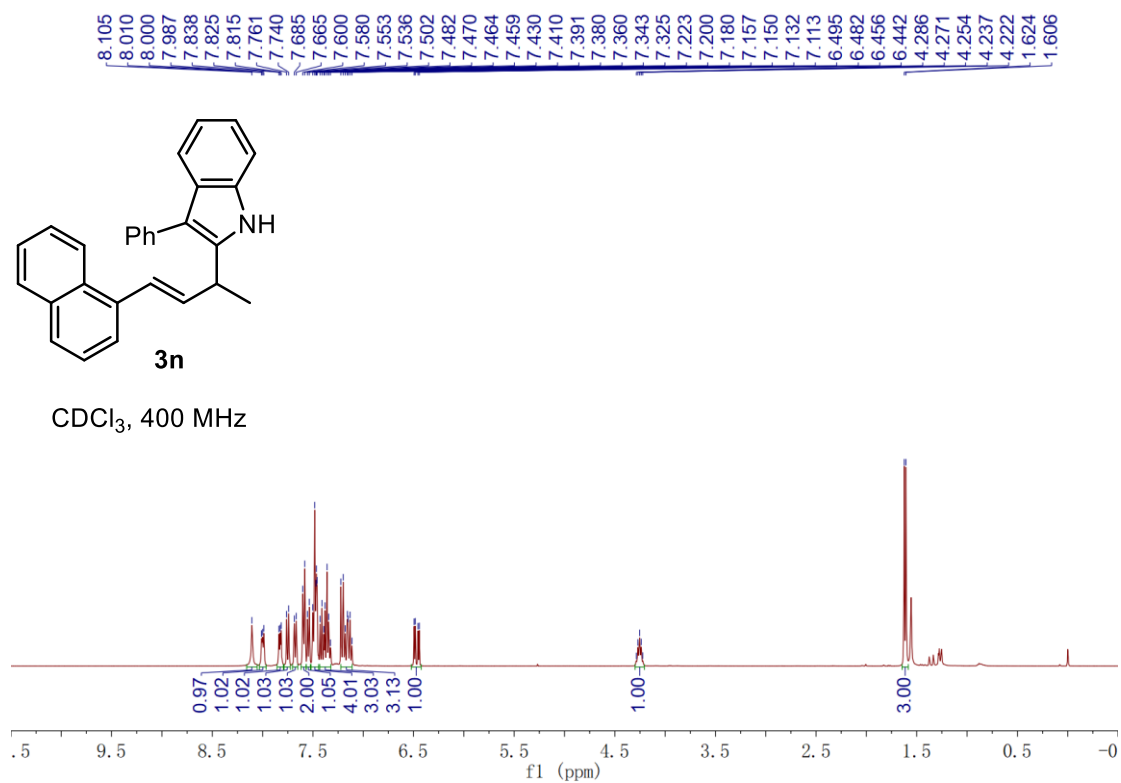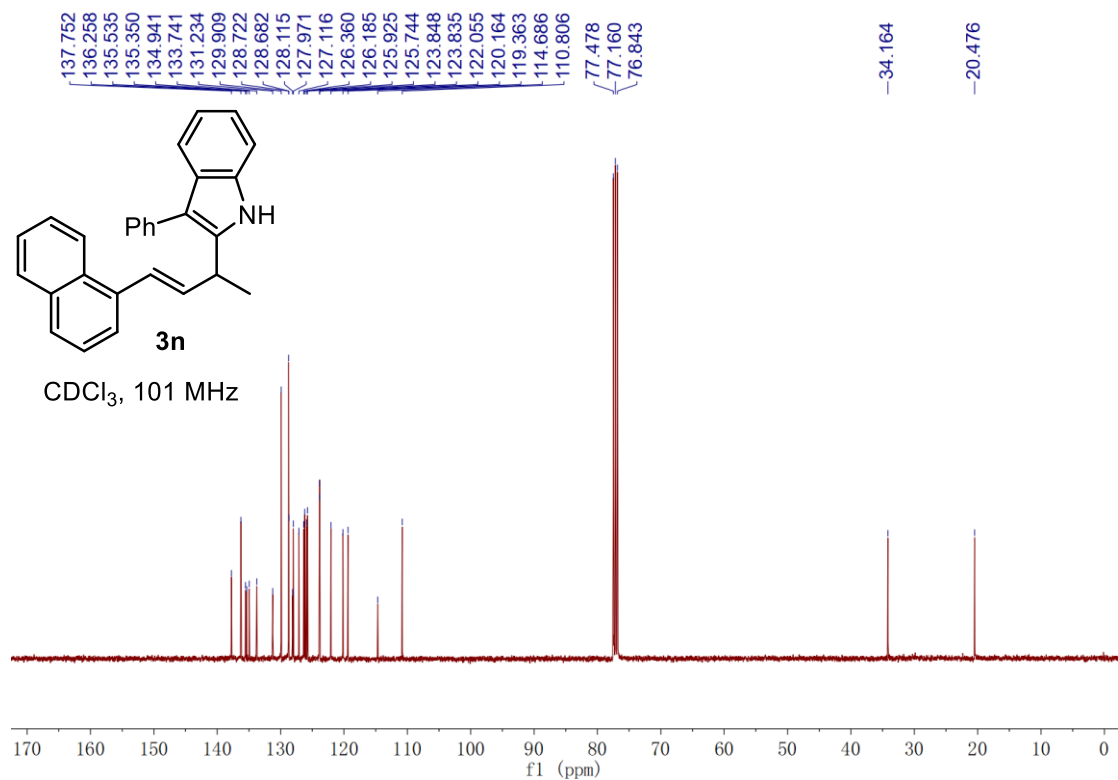

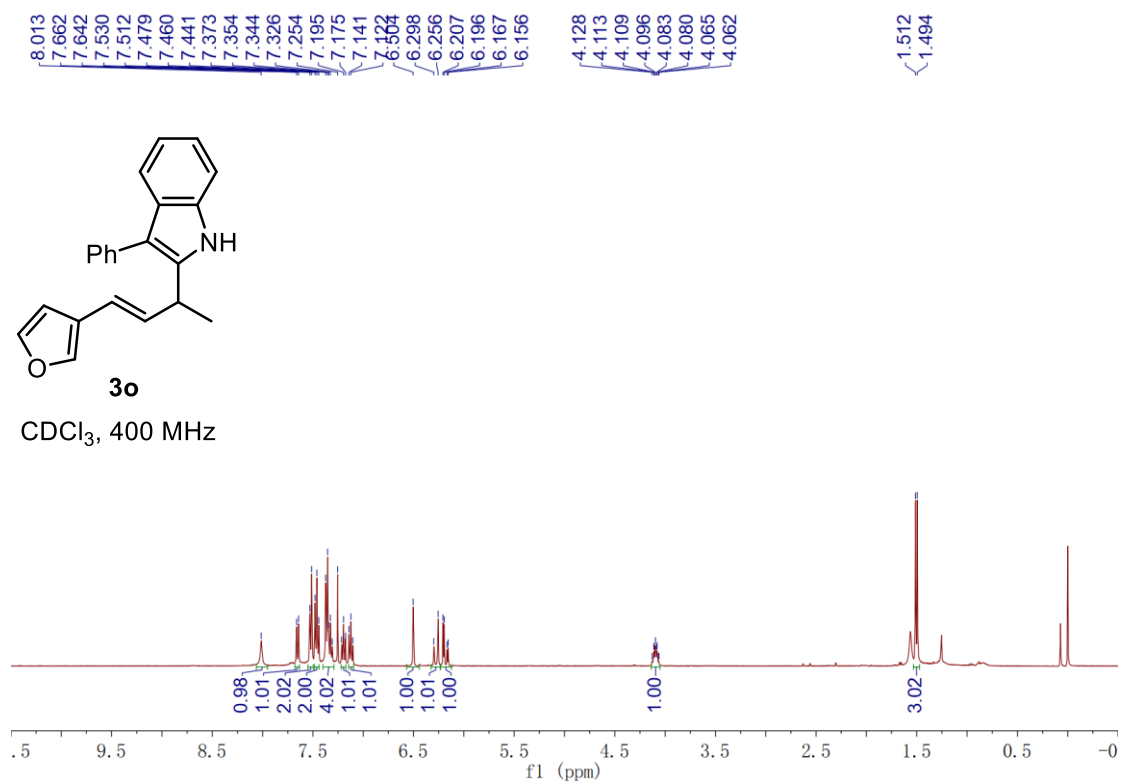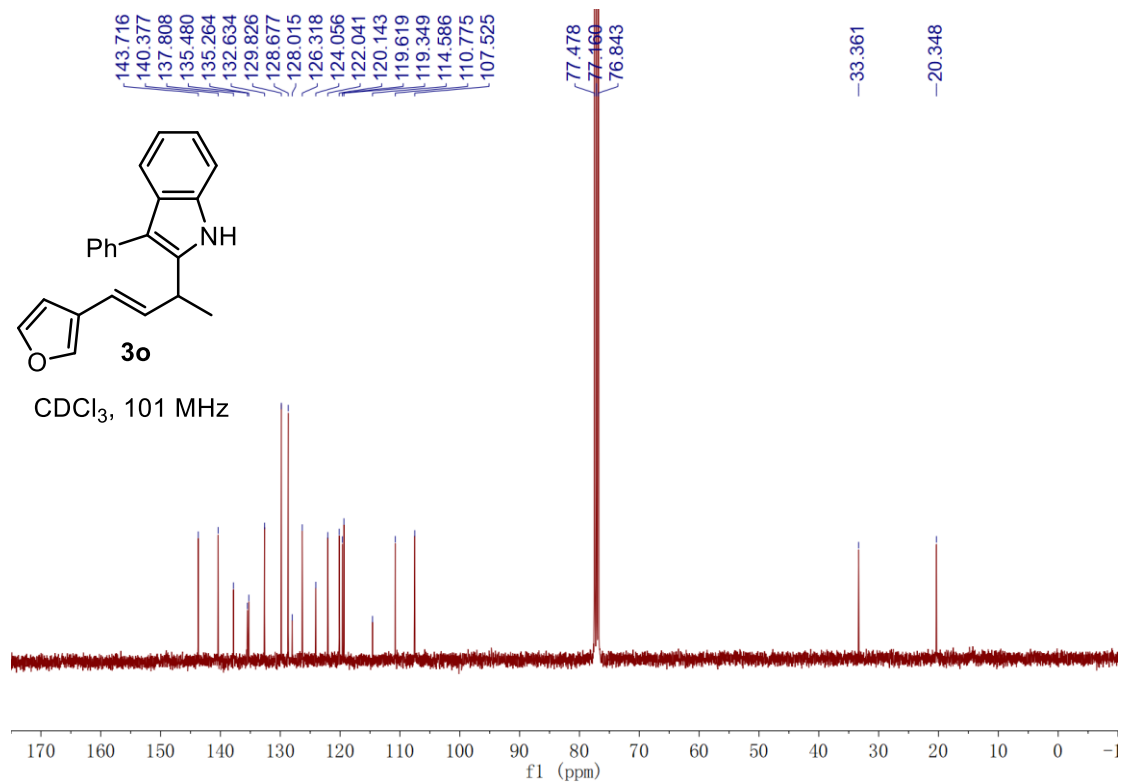

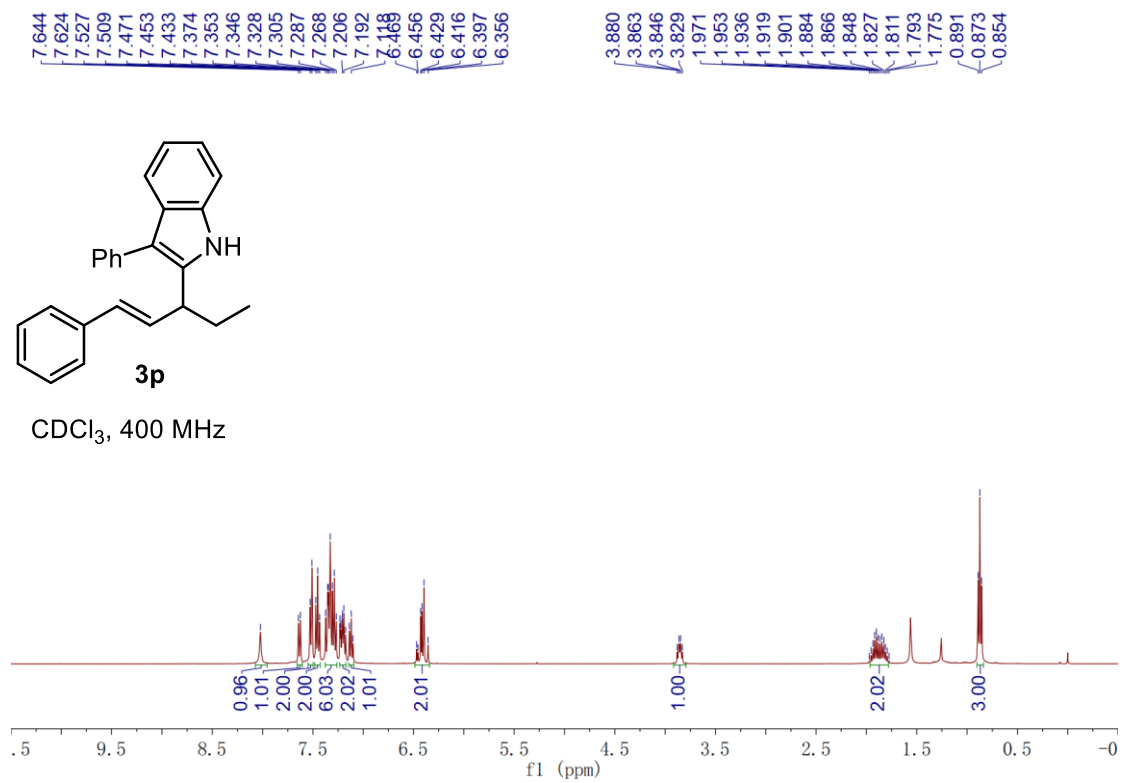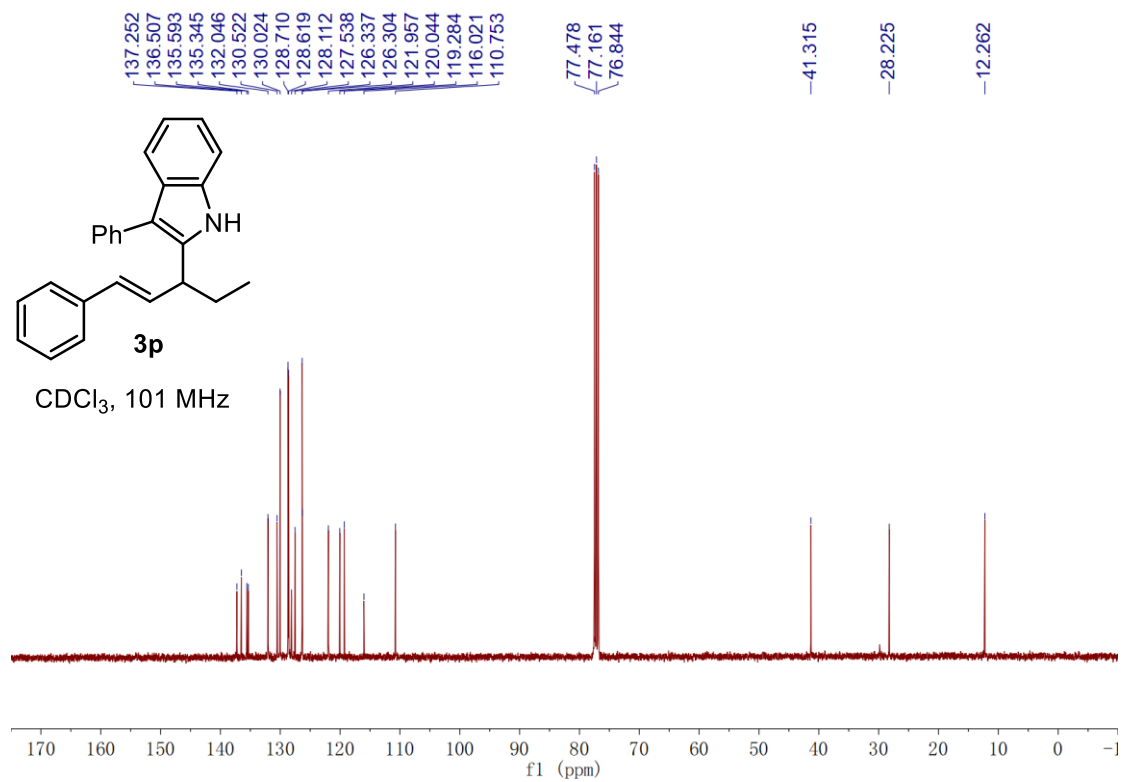

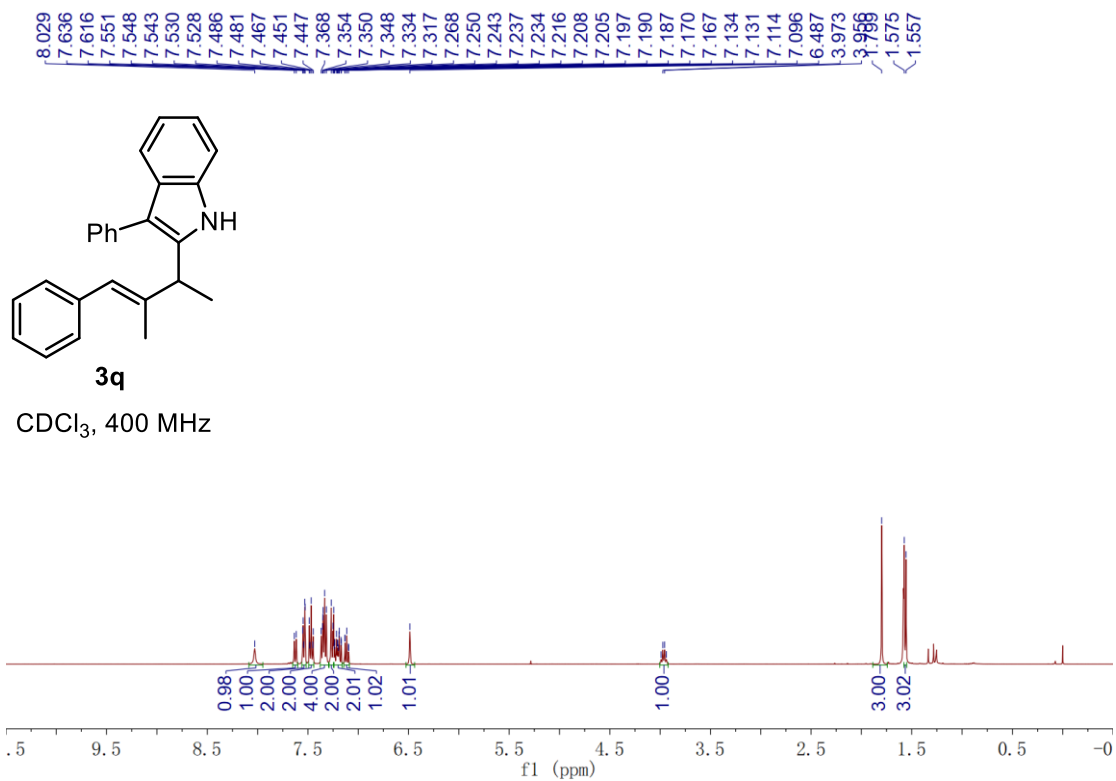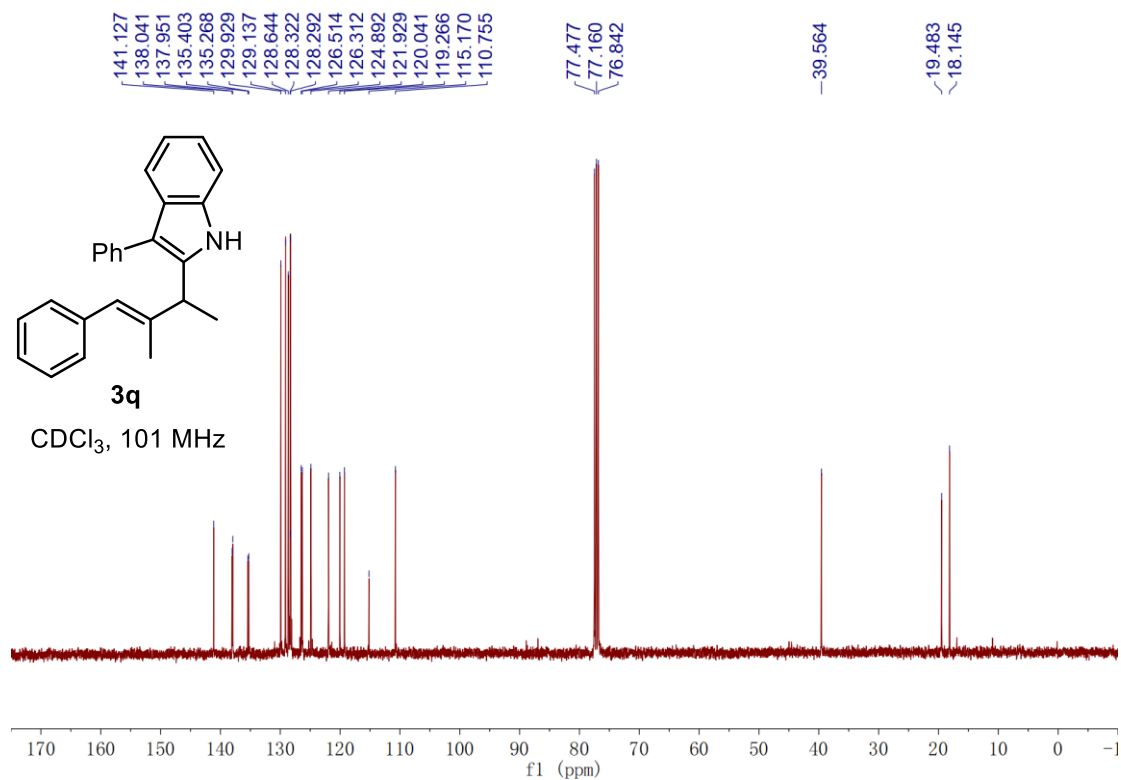



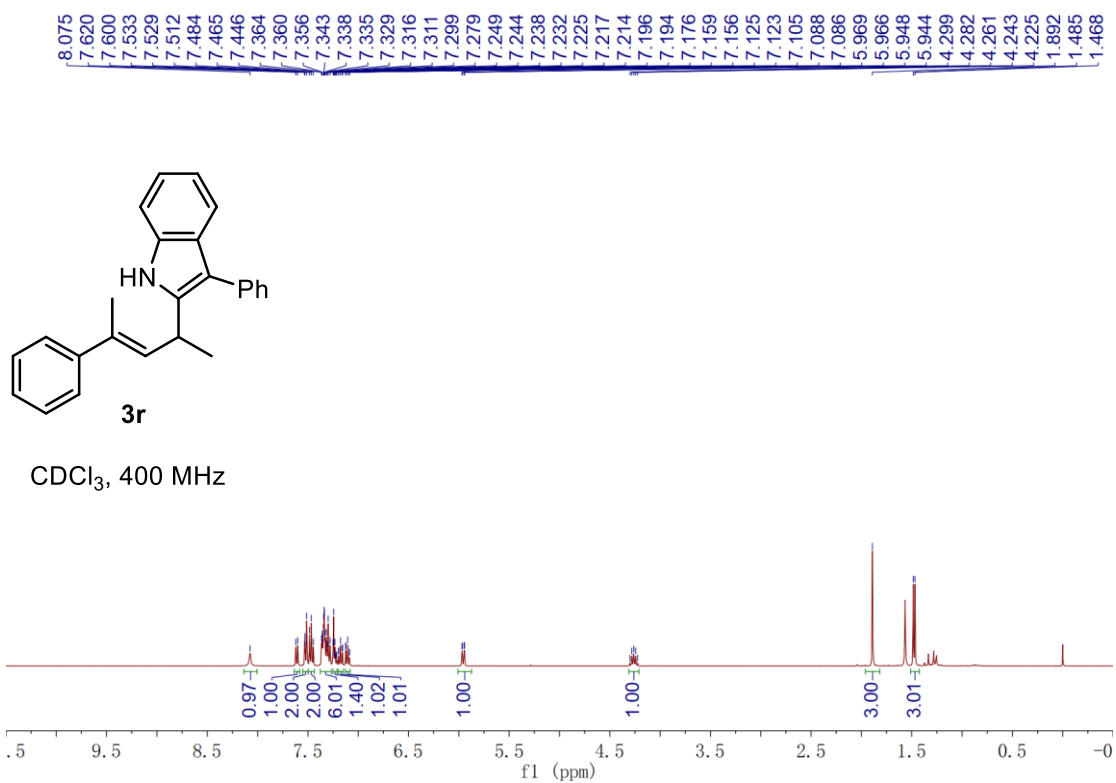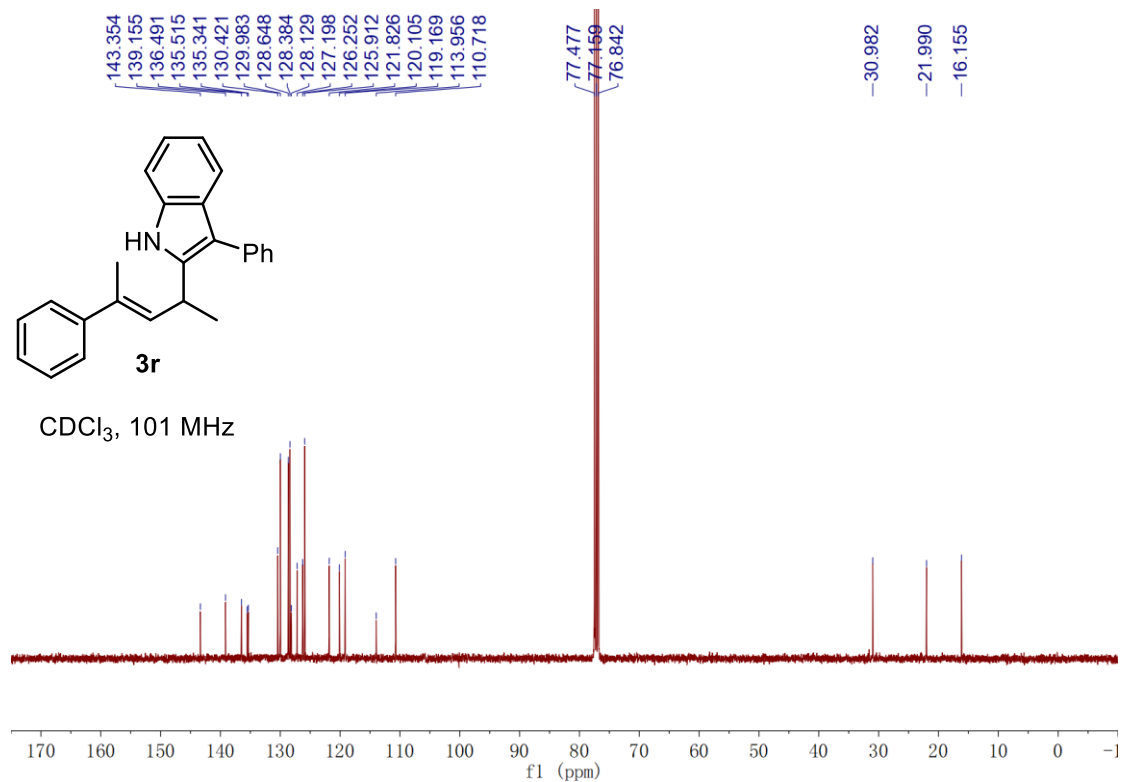

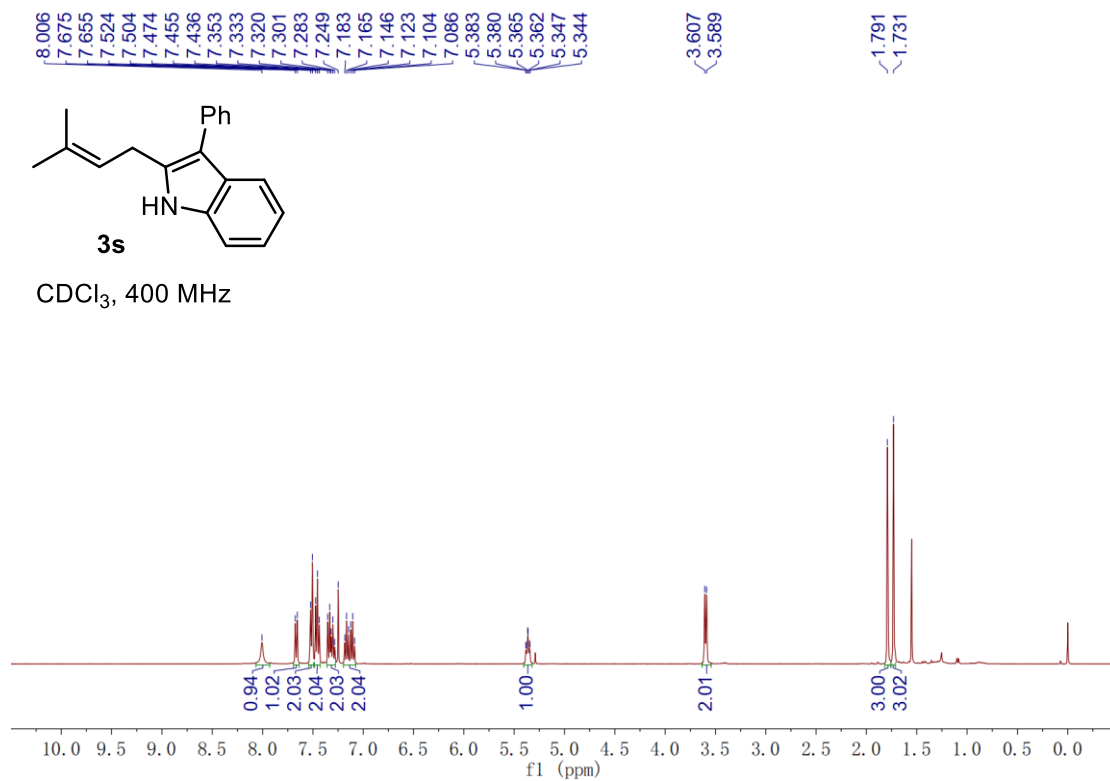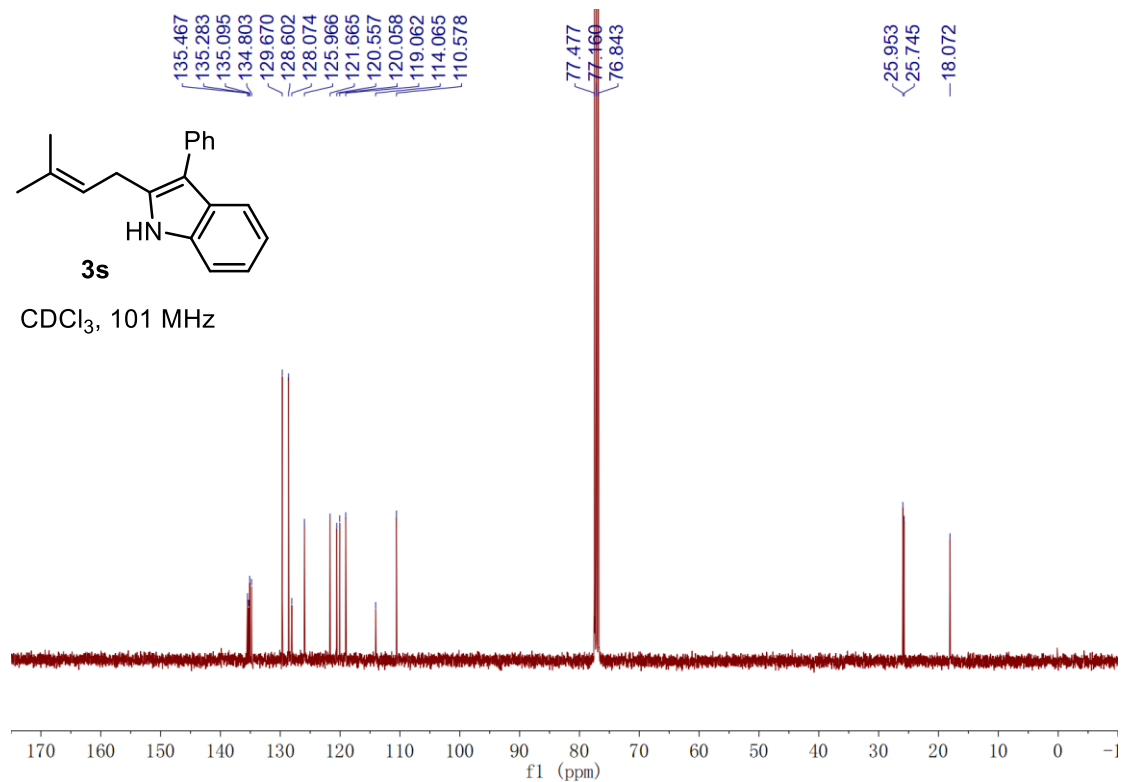

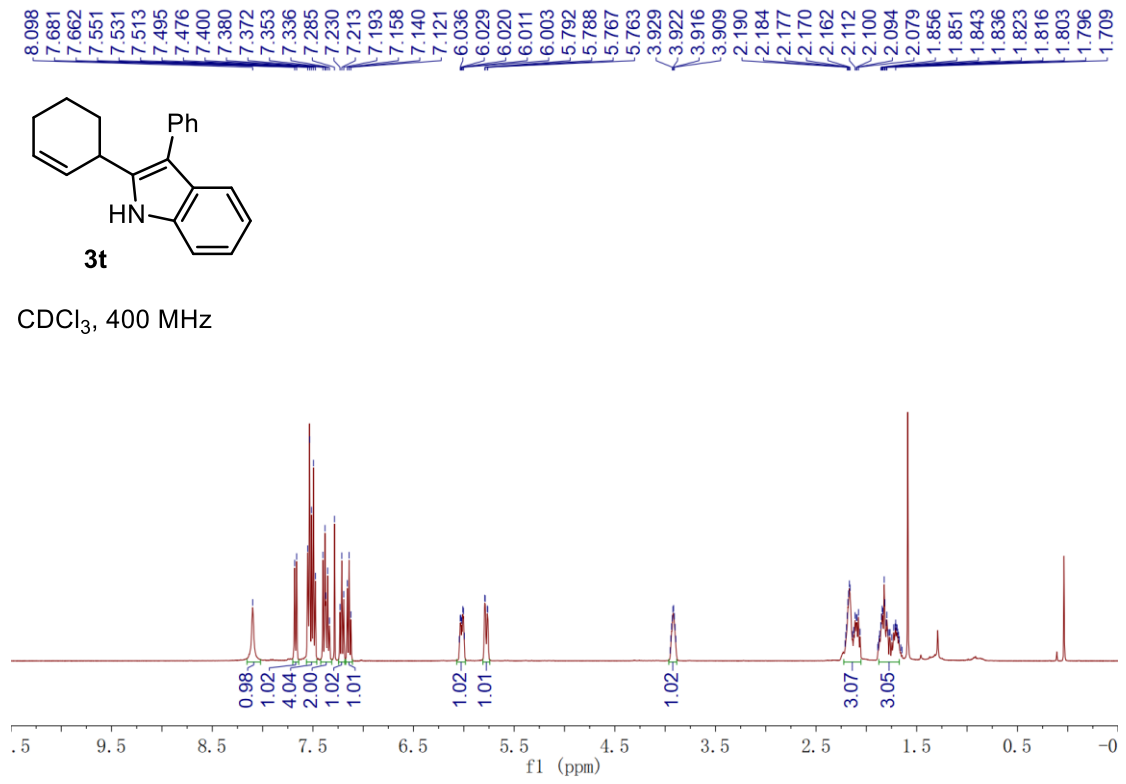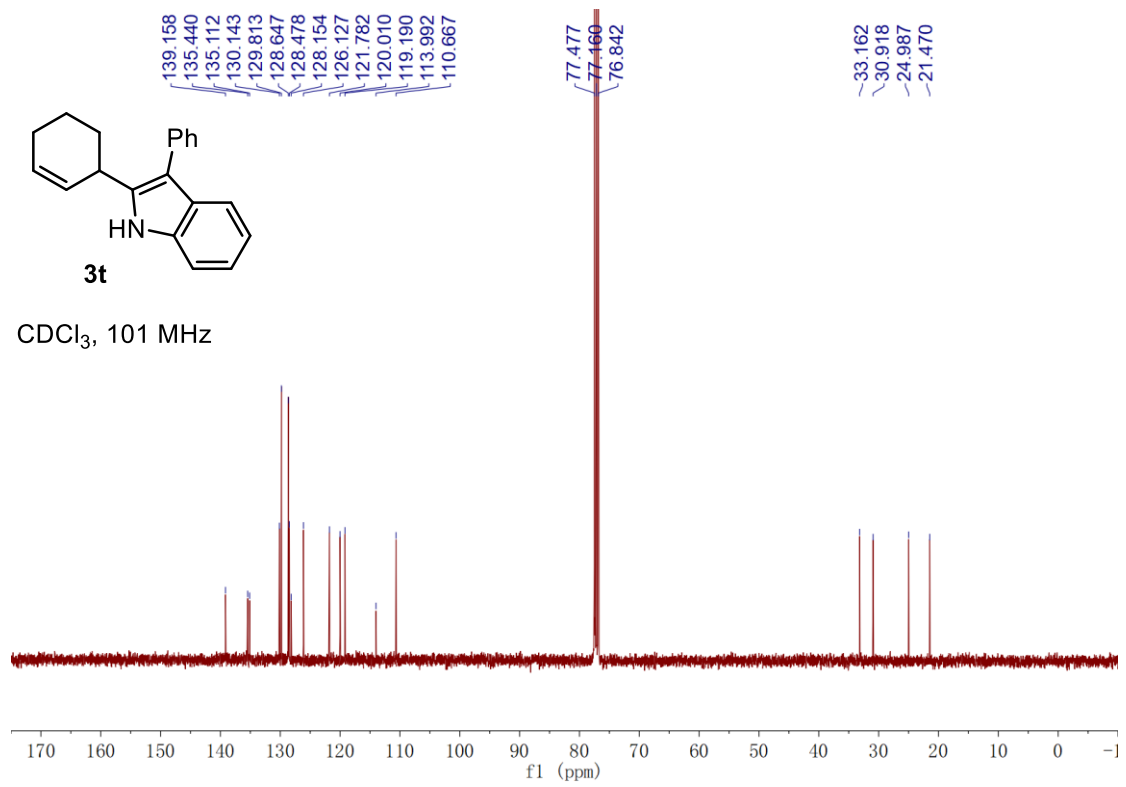

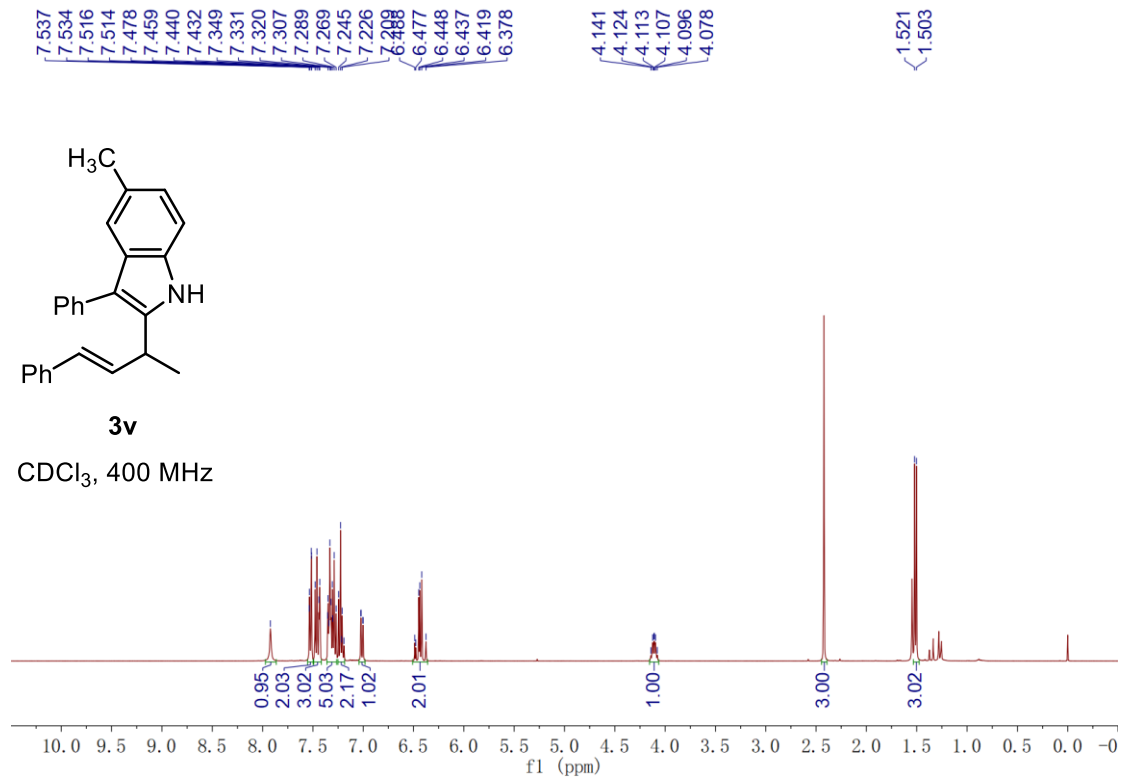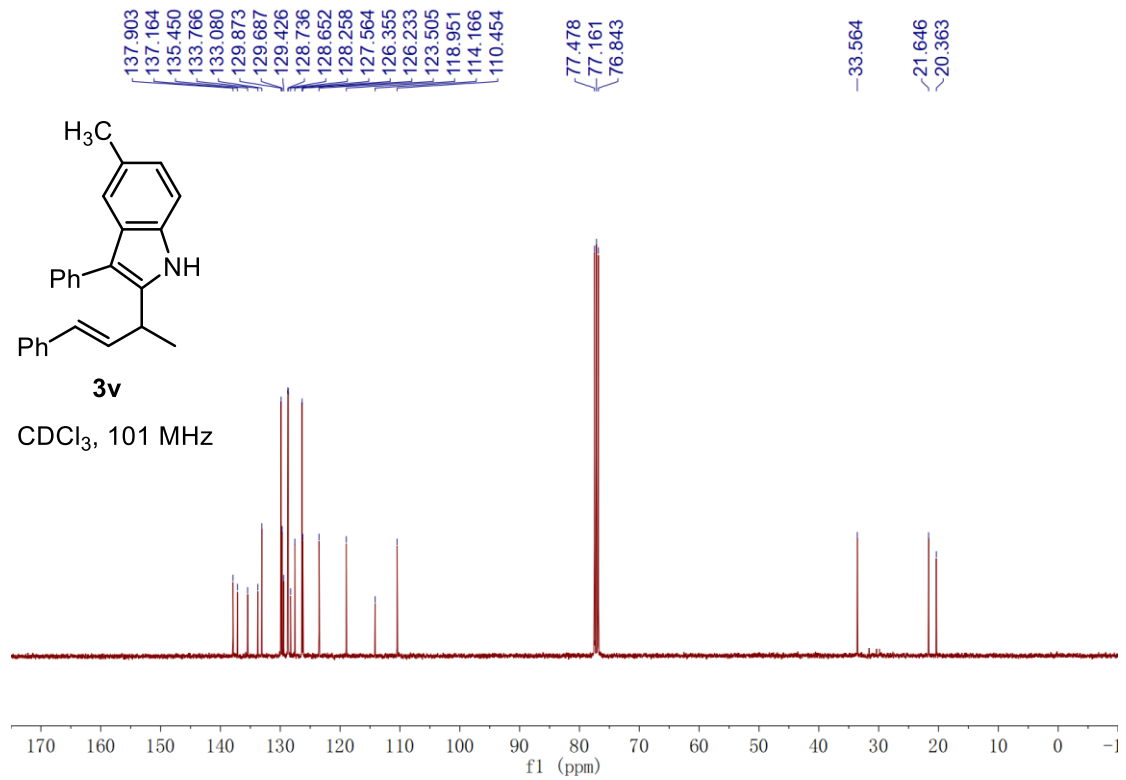

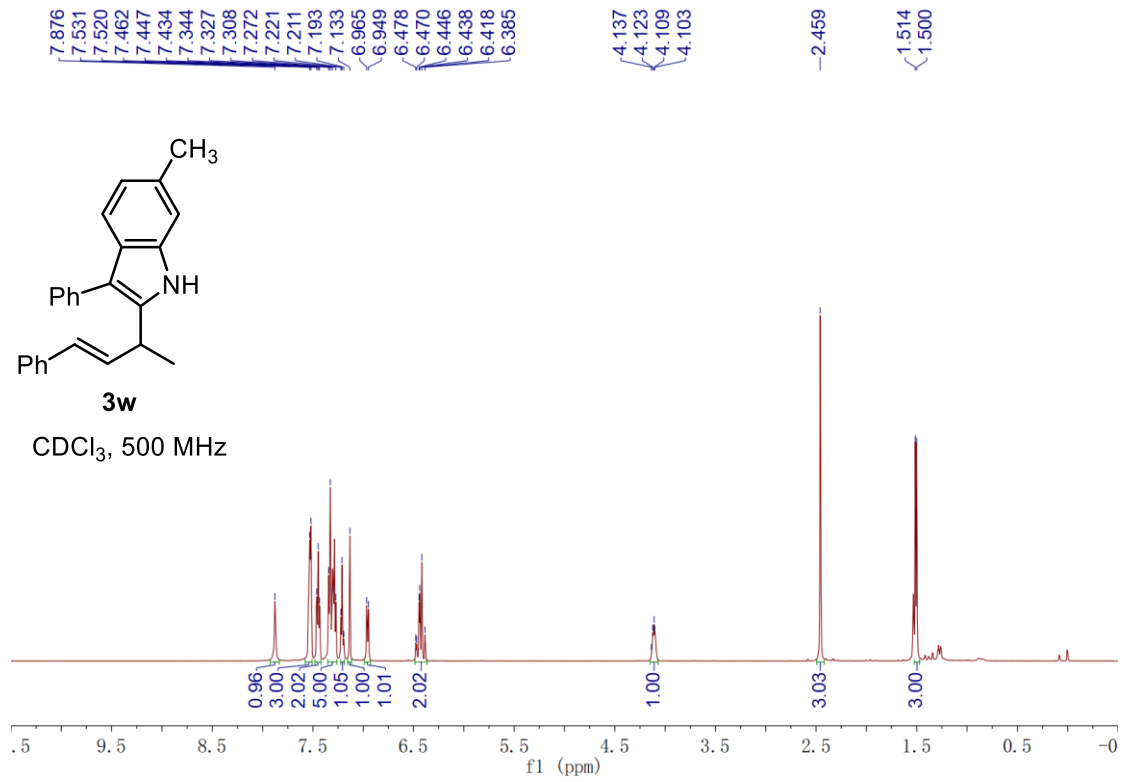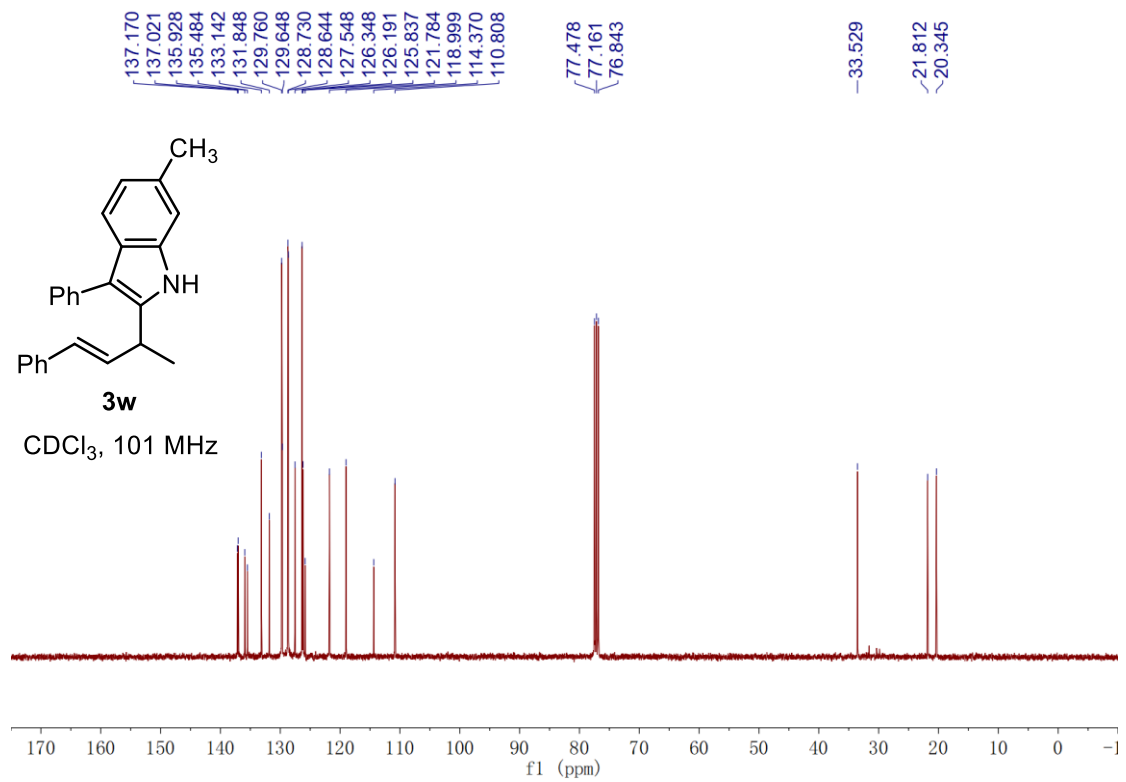

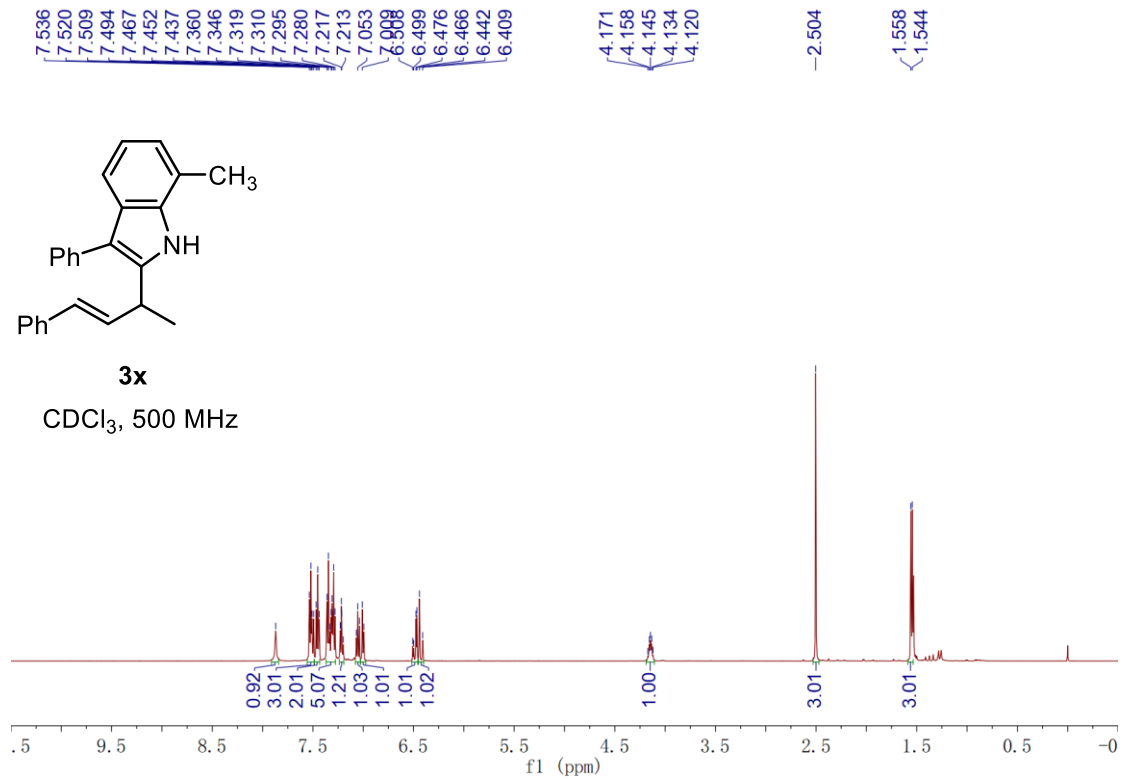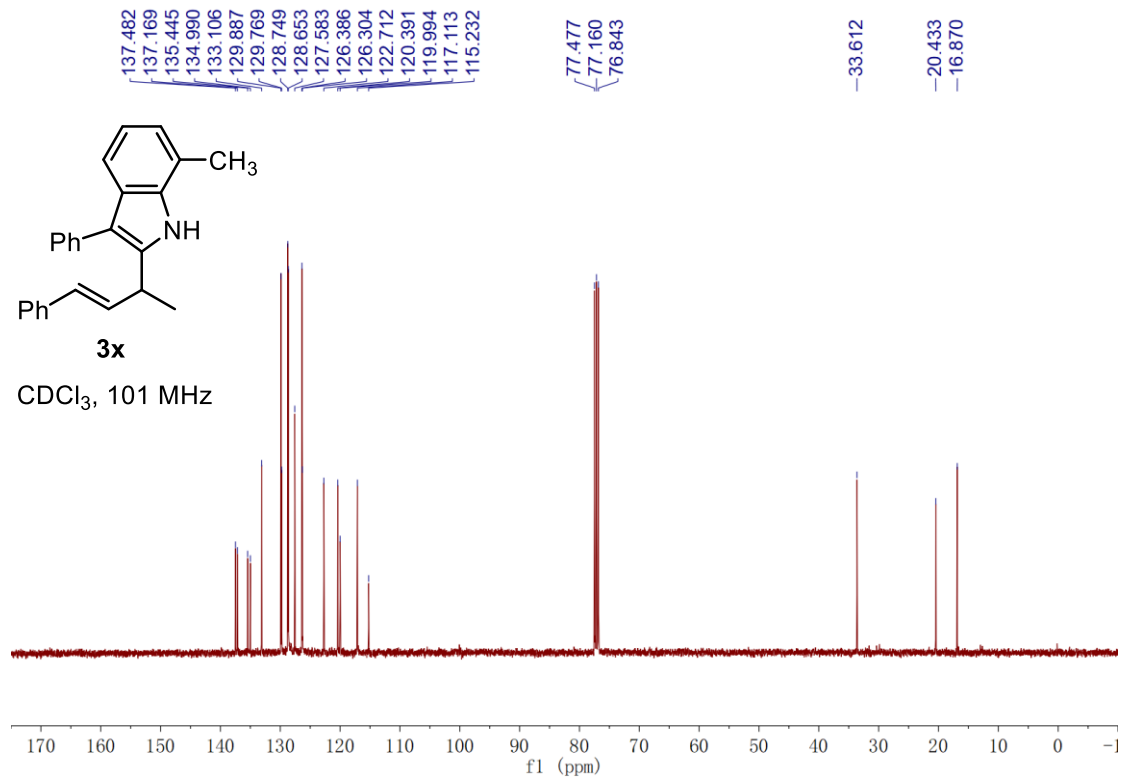

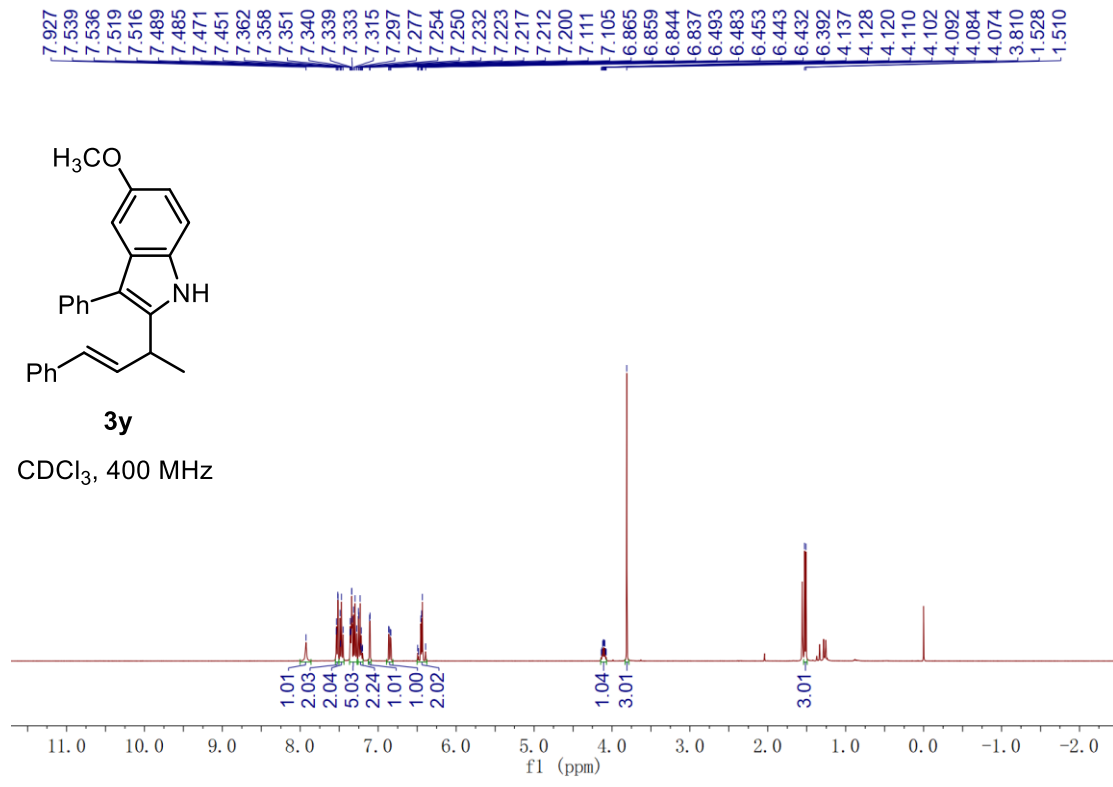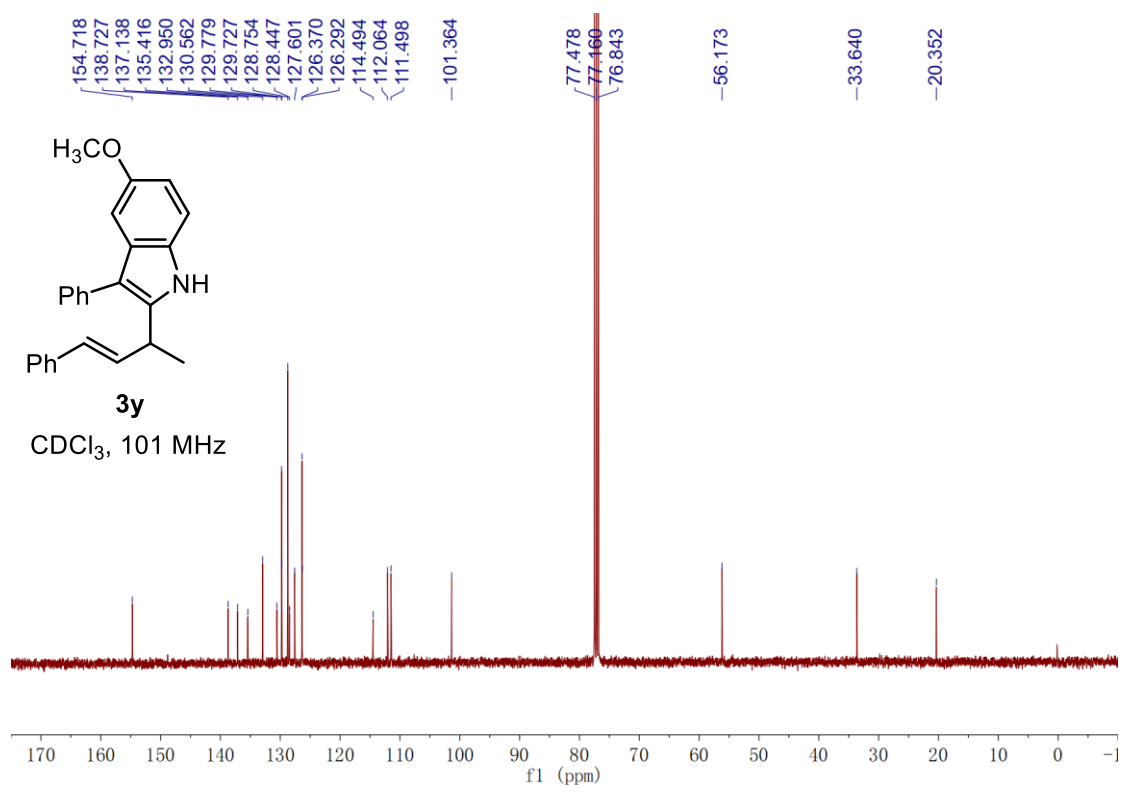

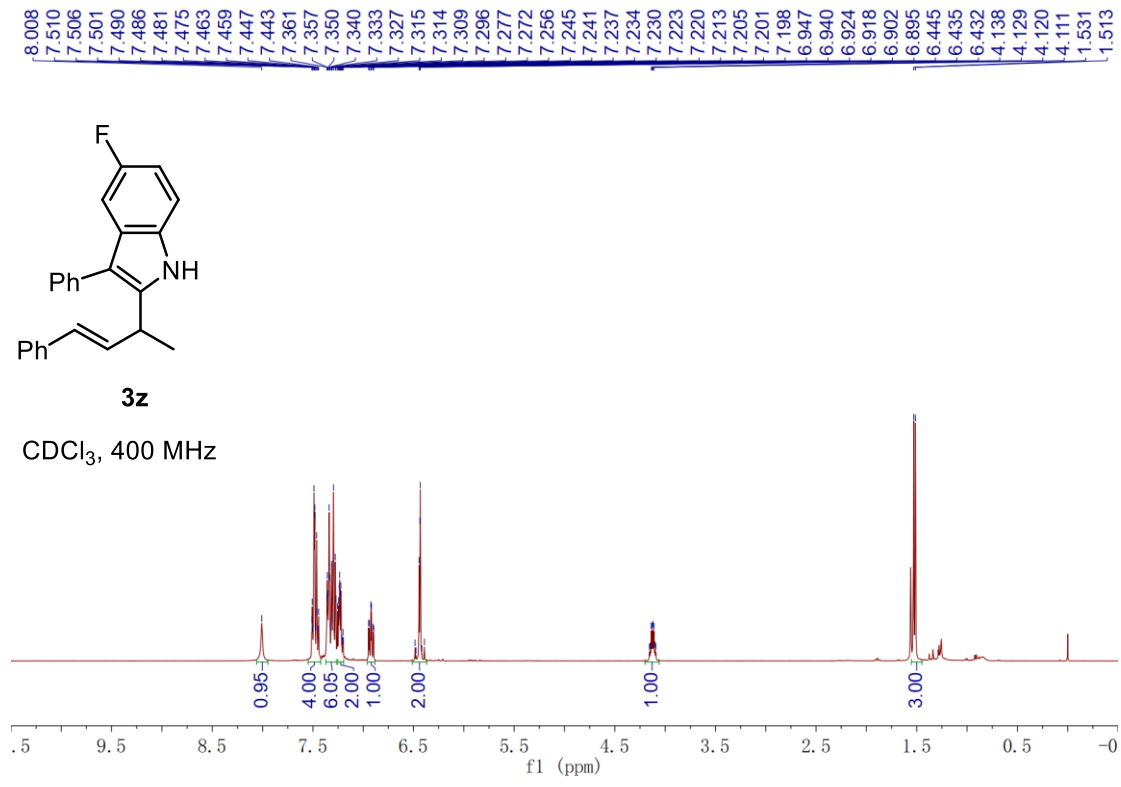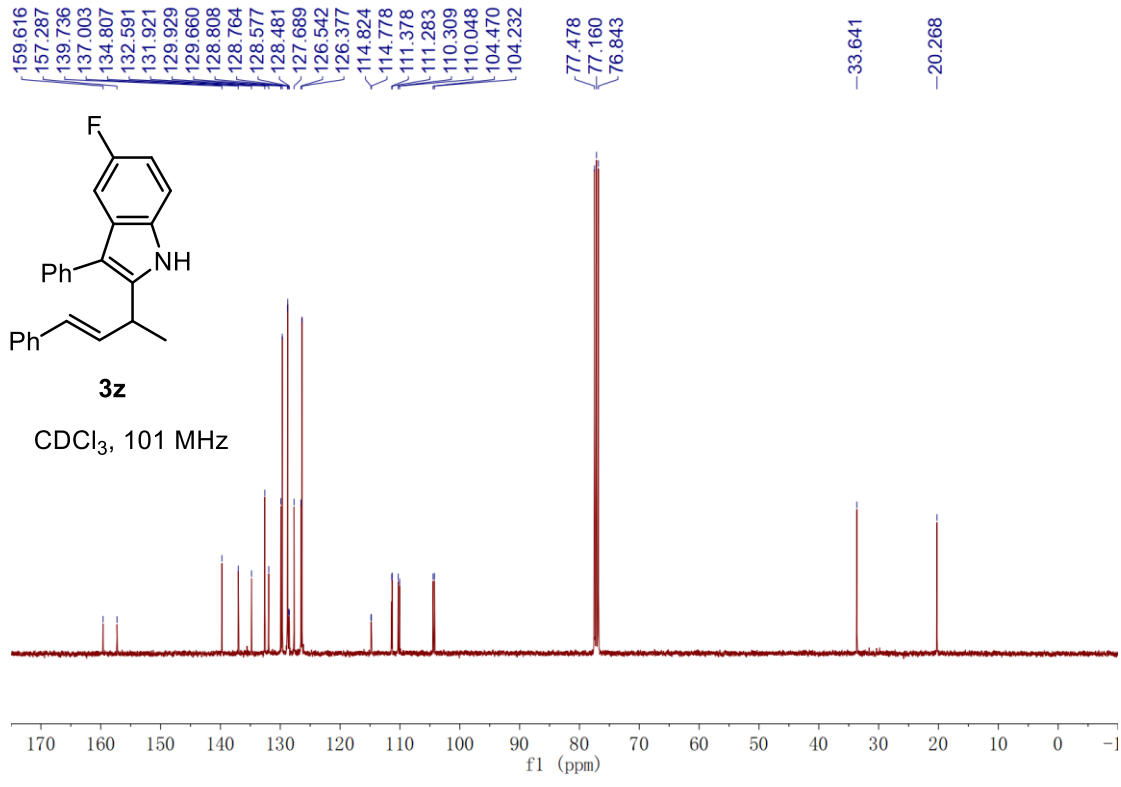



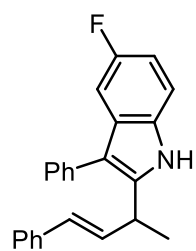

**3z**

CDCl<sub>3</sub>, 376 MHz

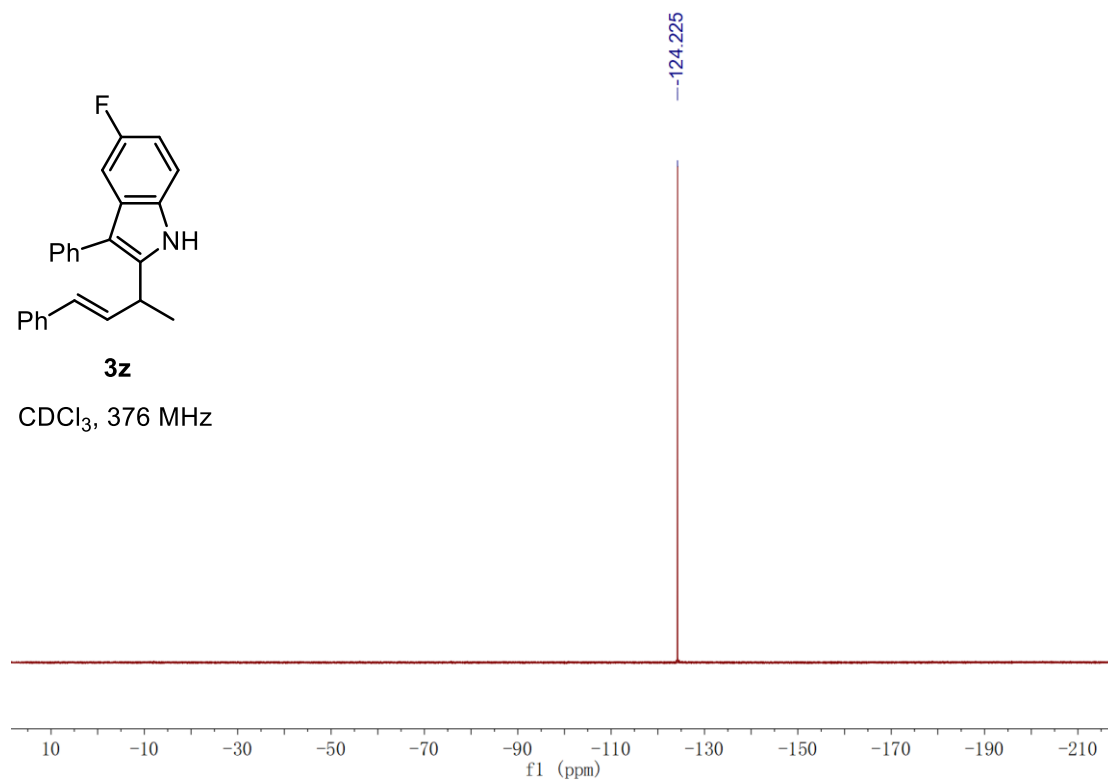

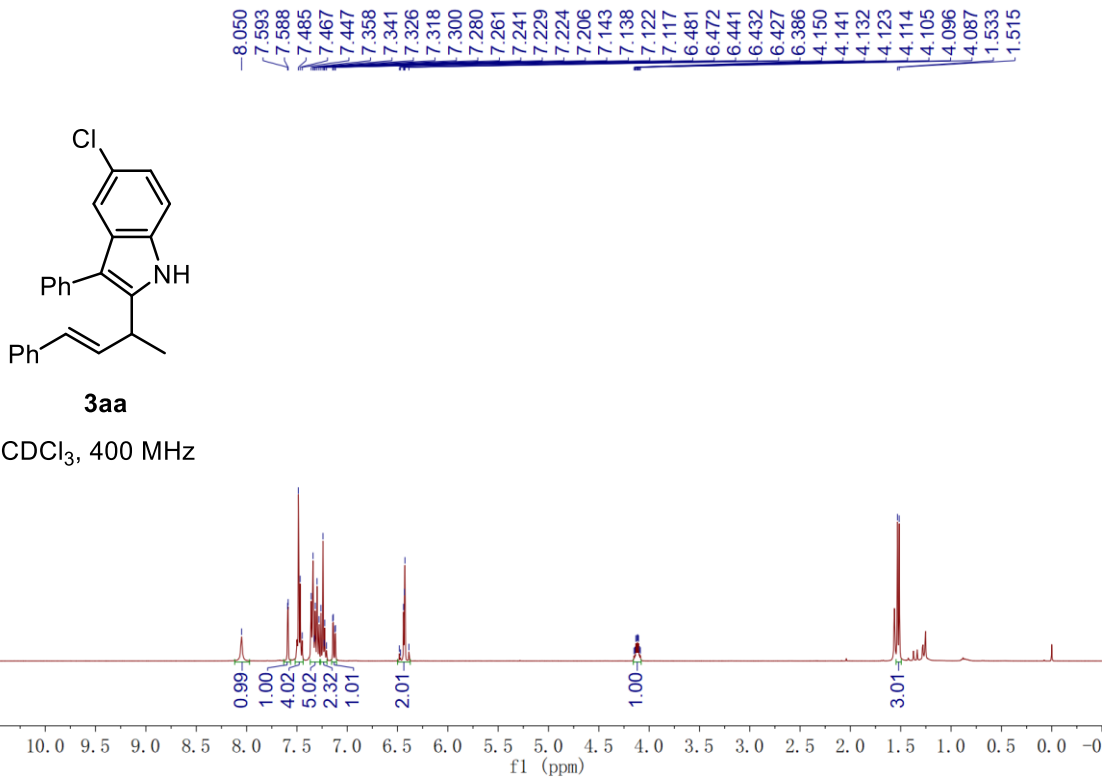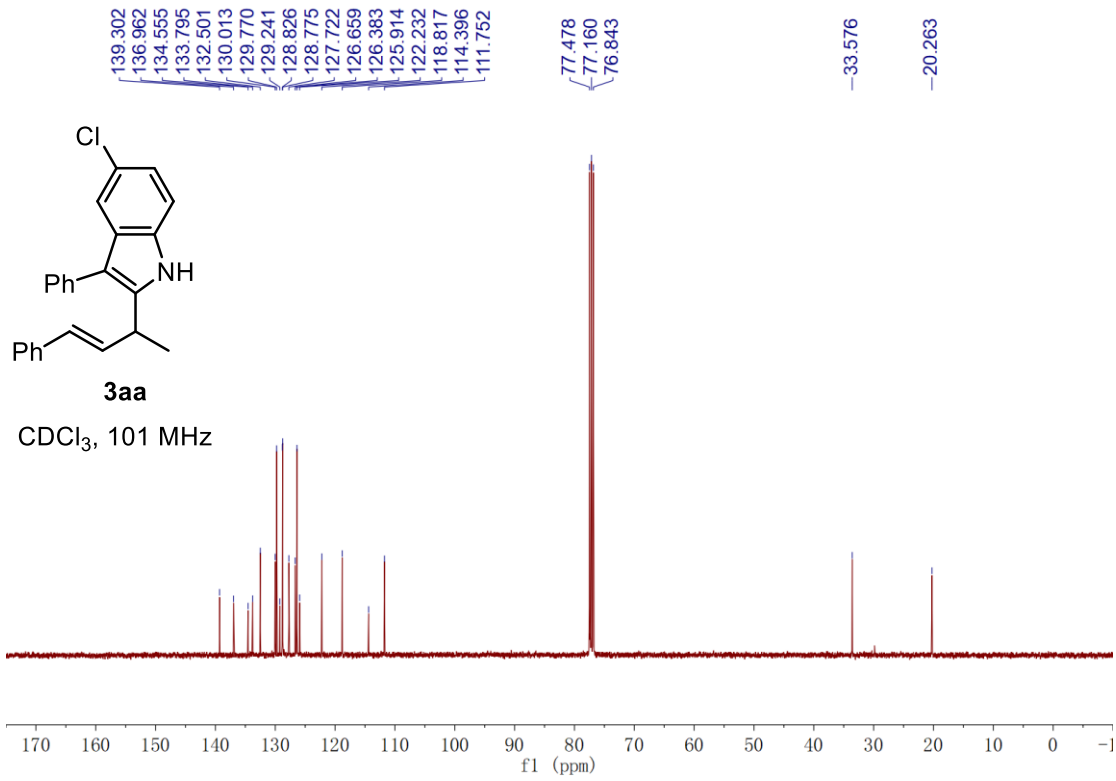

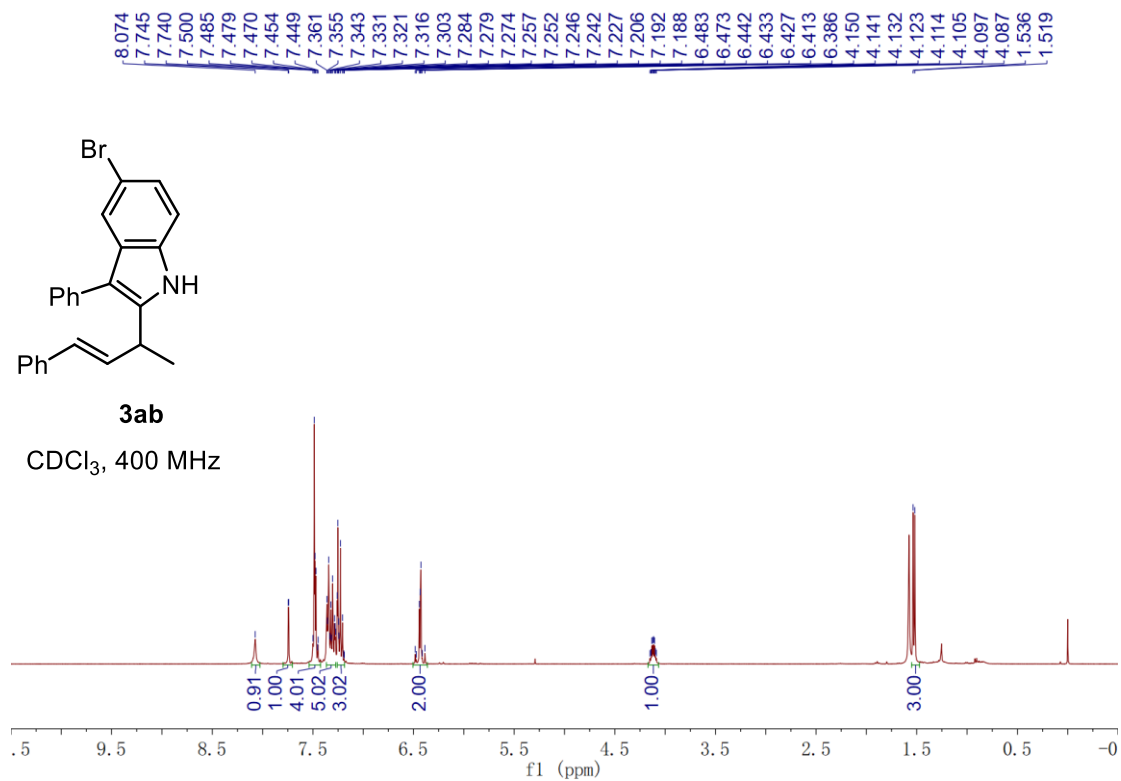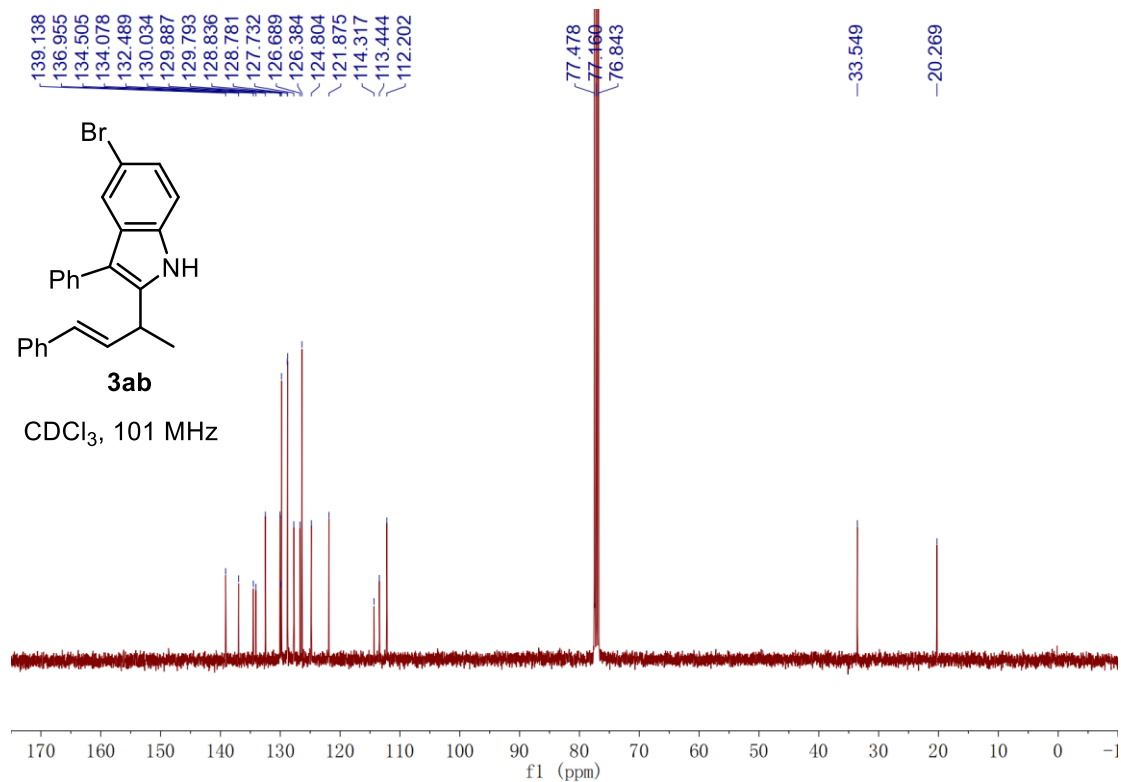

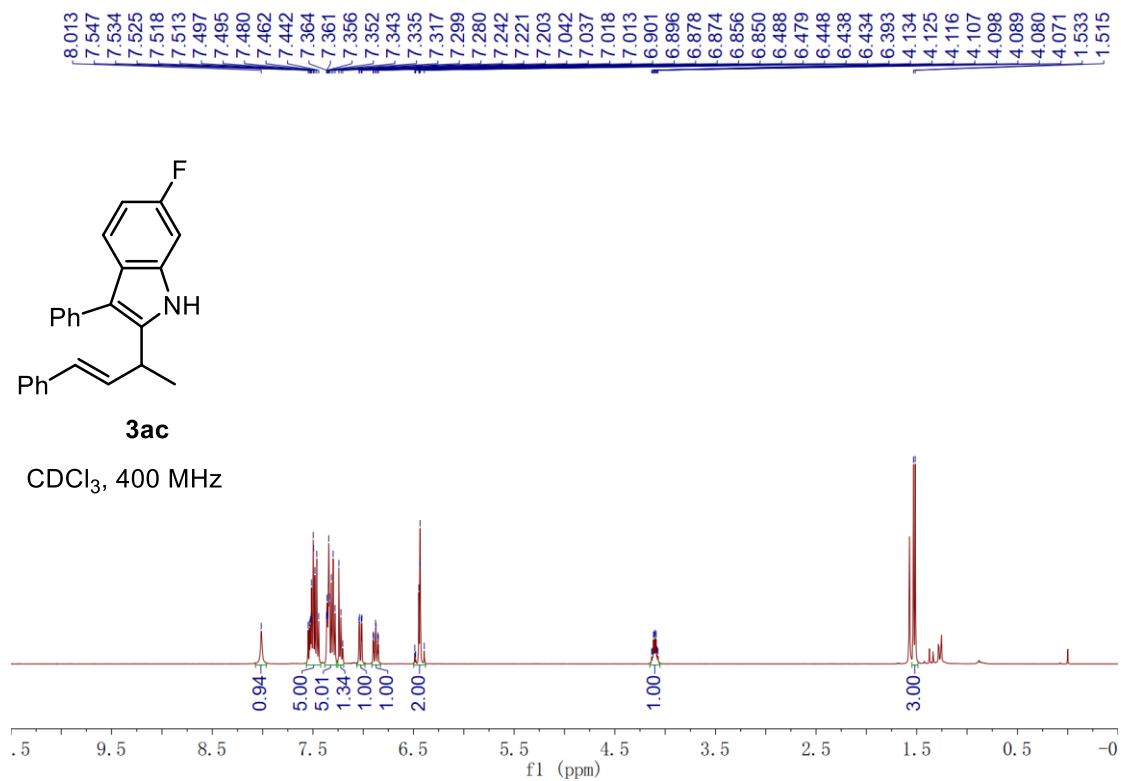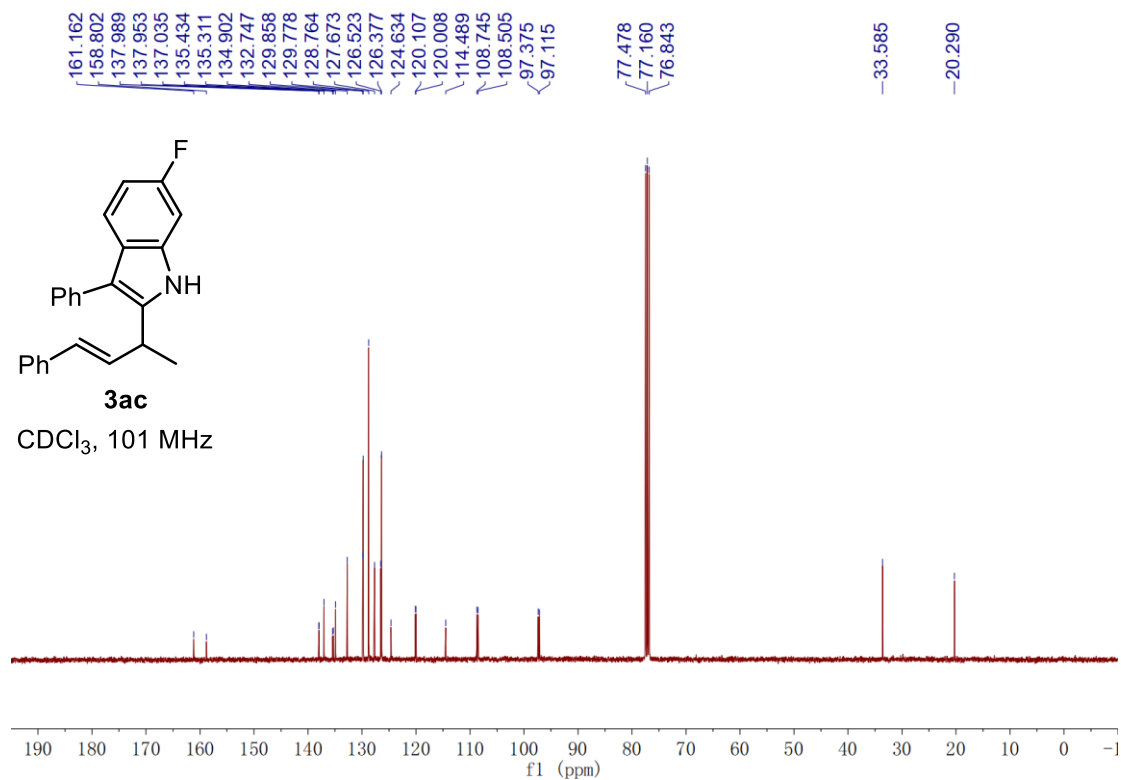

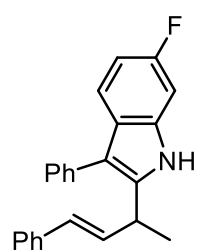

**3ac**

CDCl<sub>3</sub>, 376 MHz

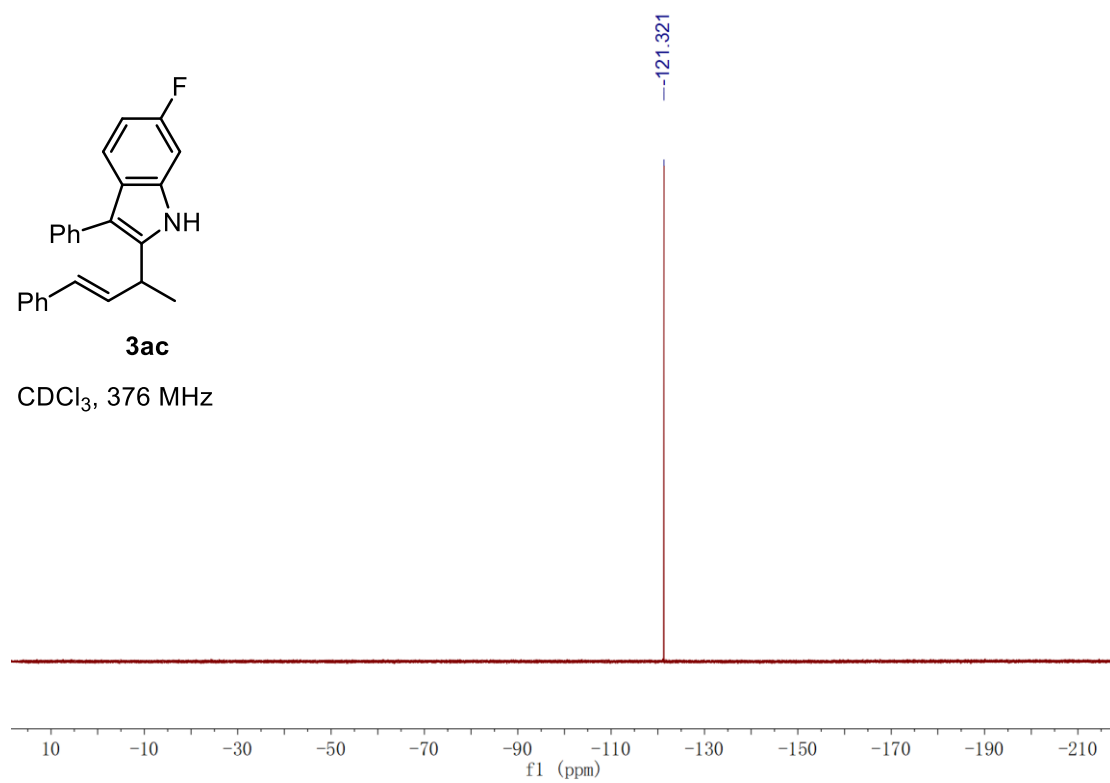

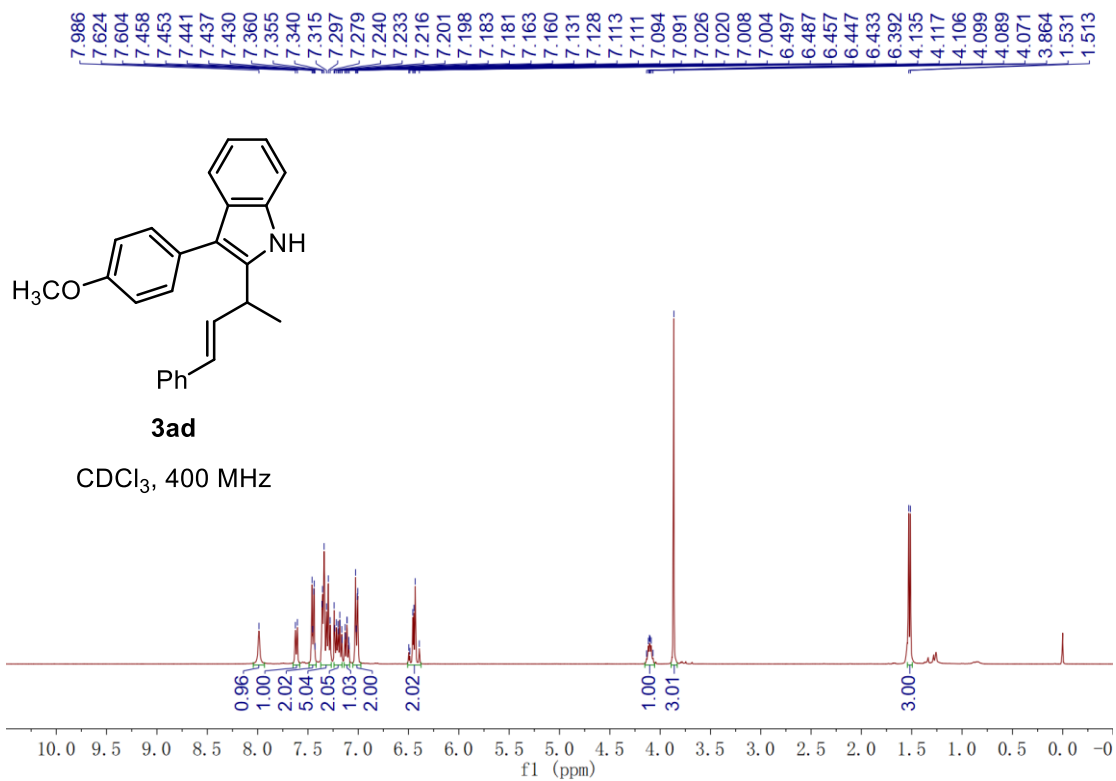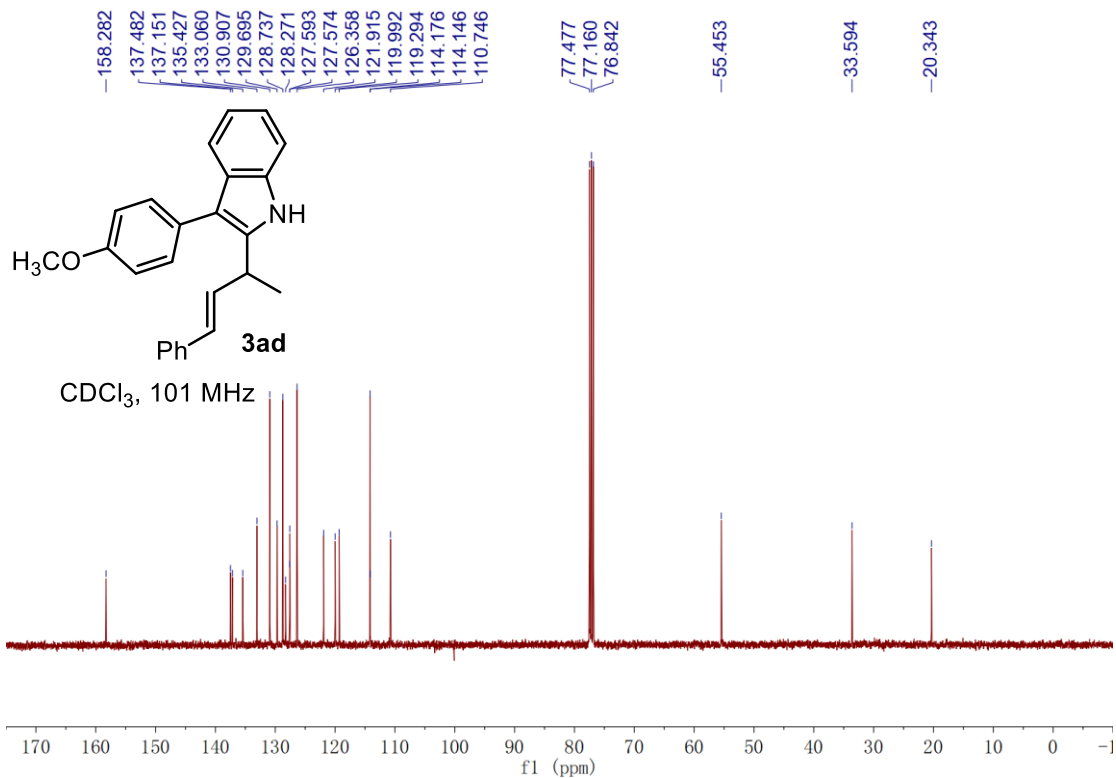

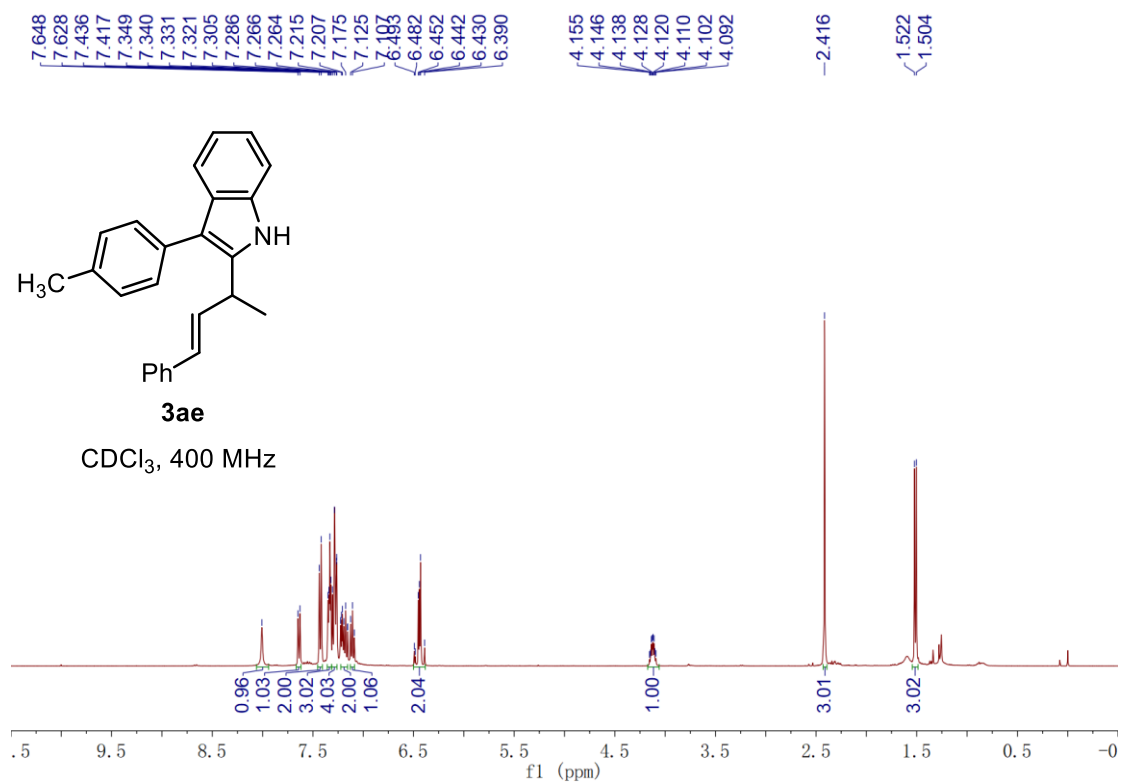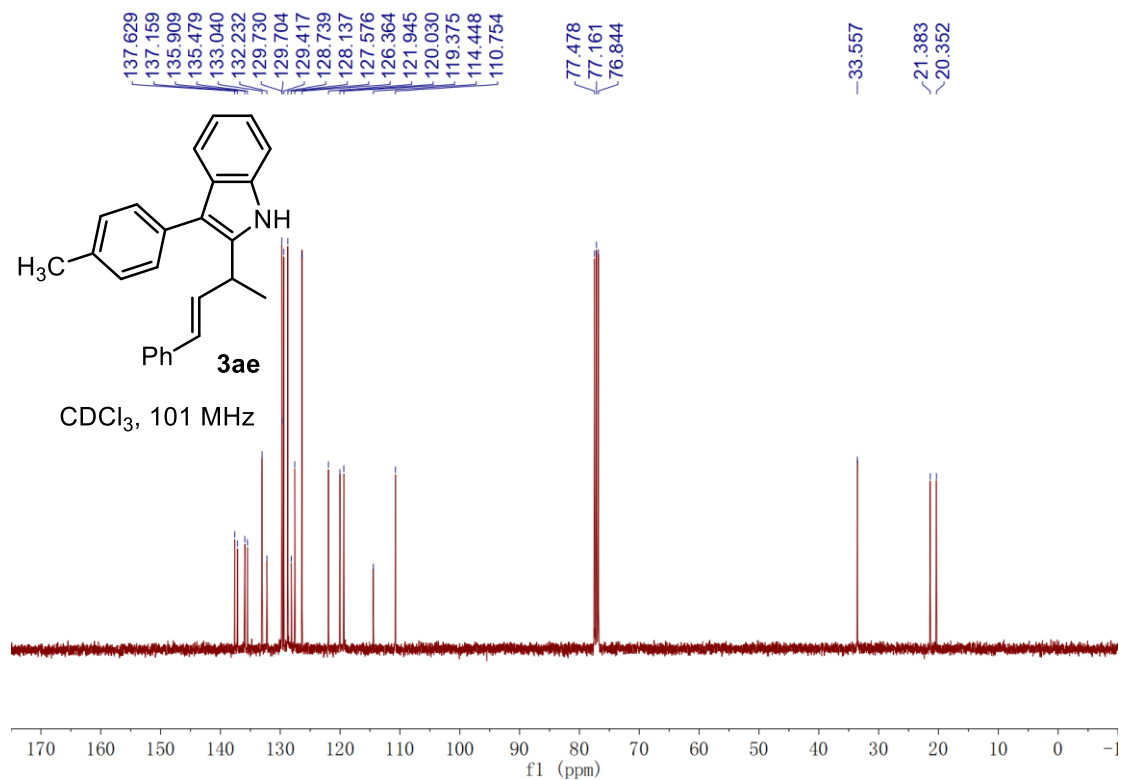

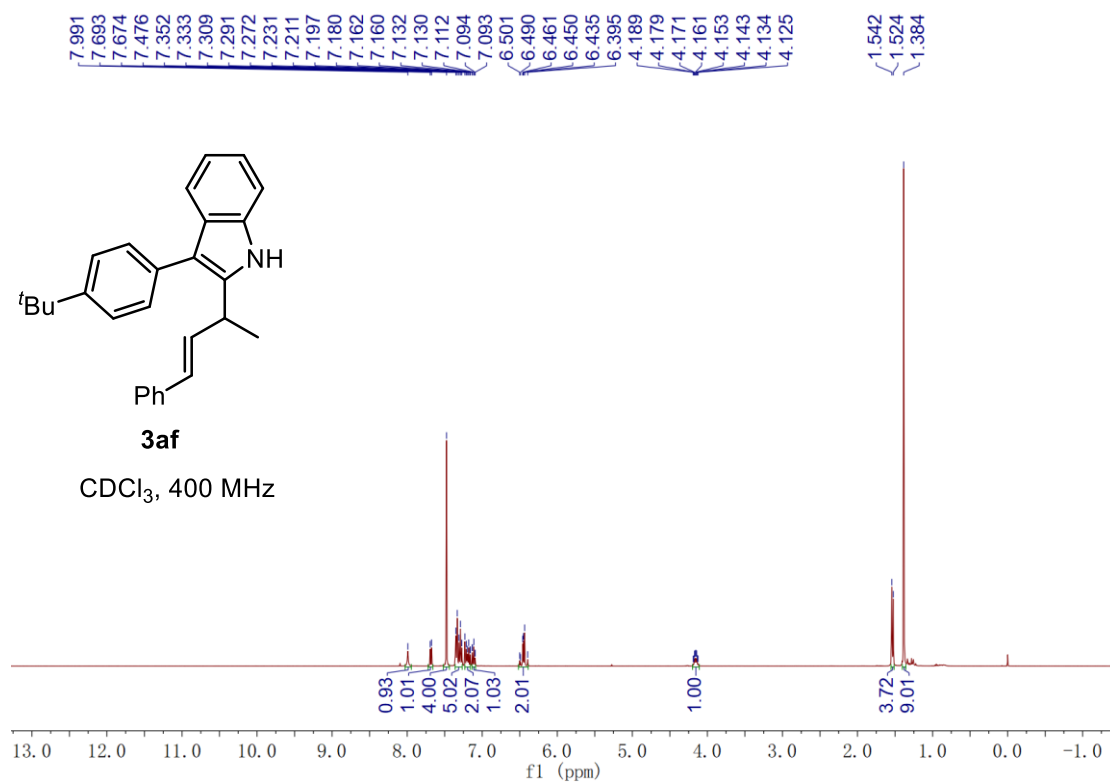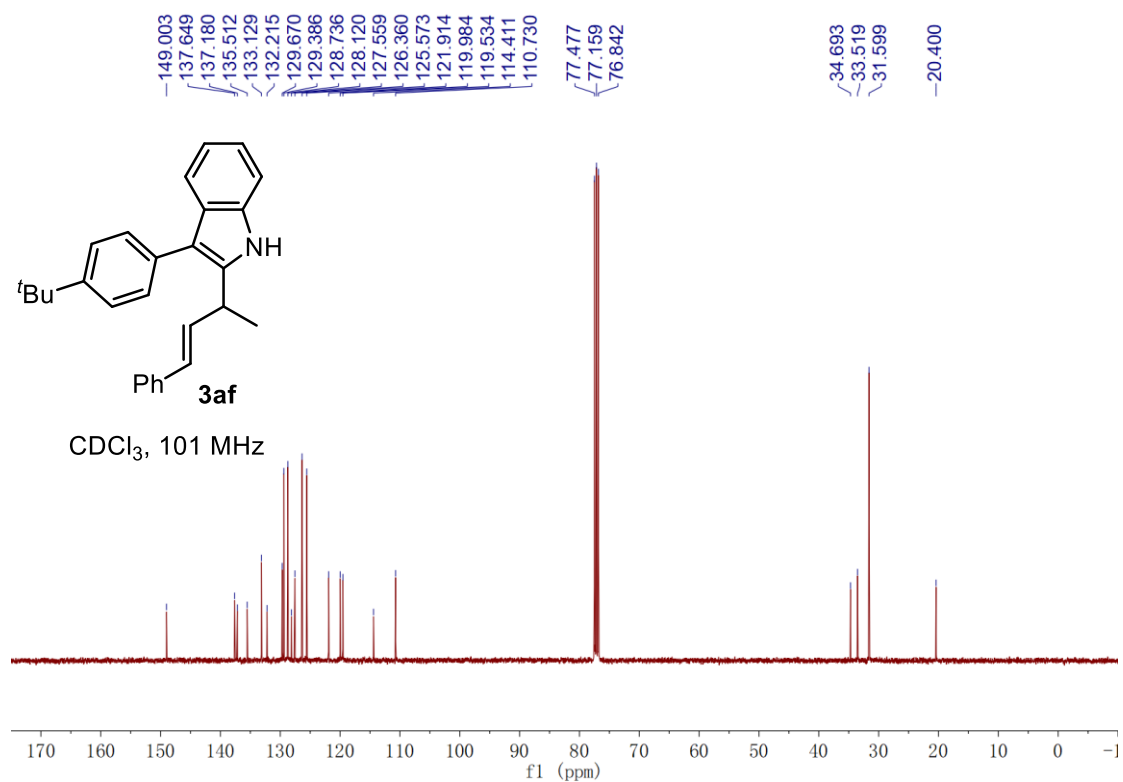



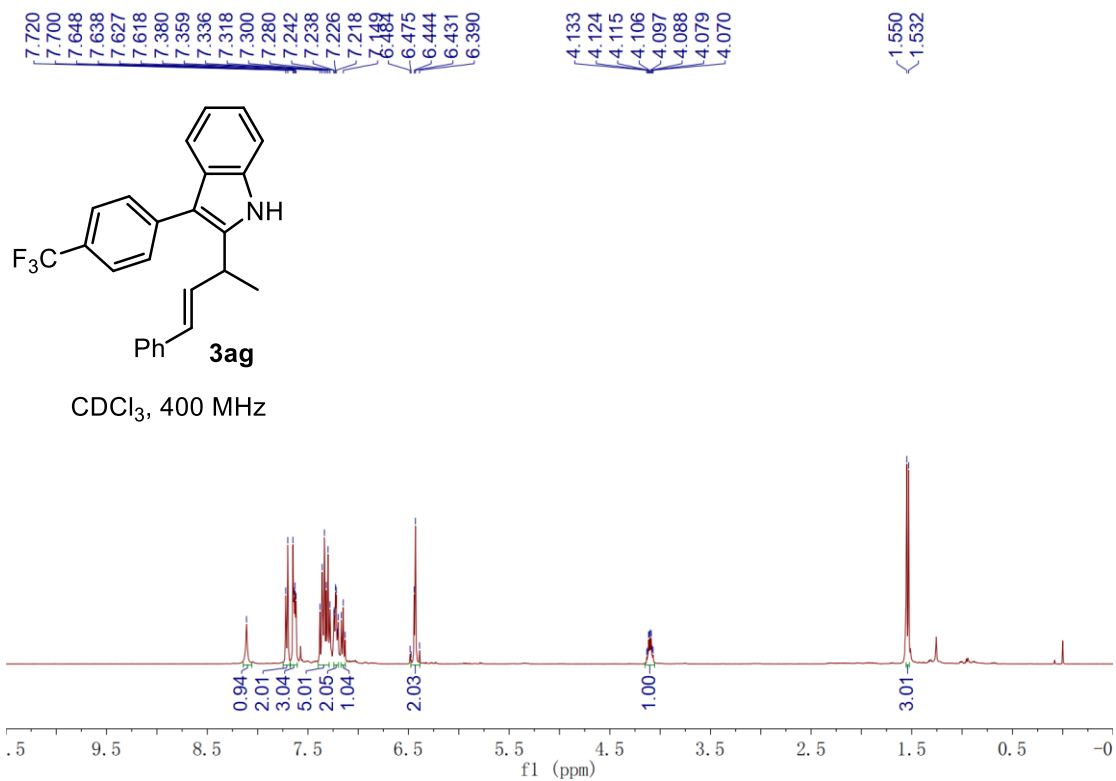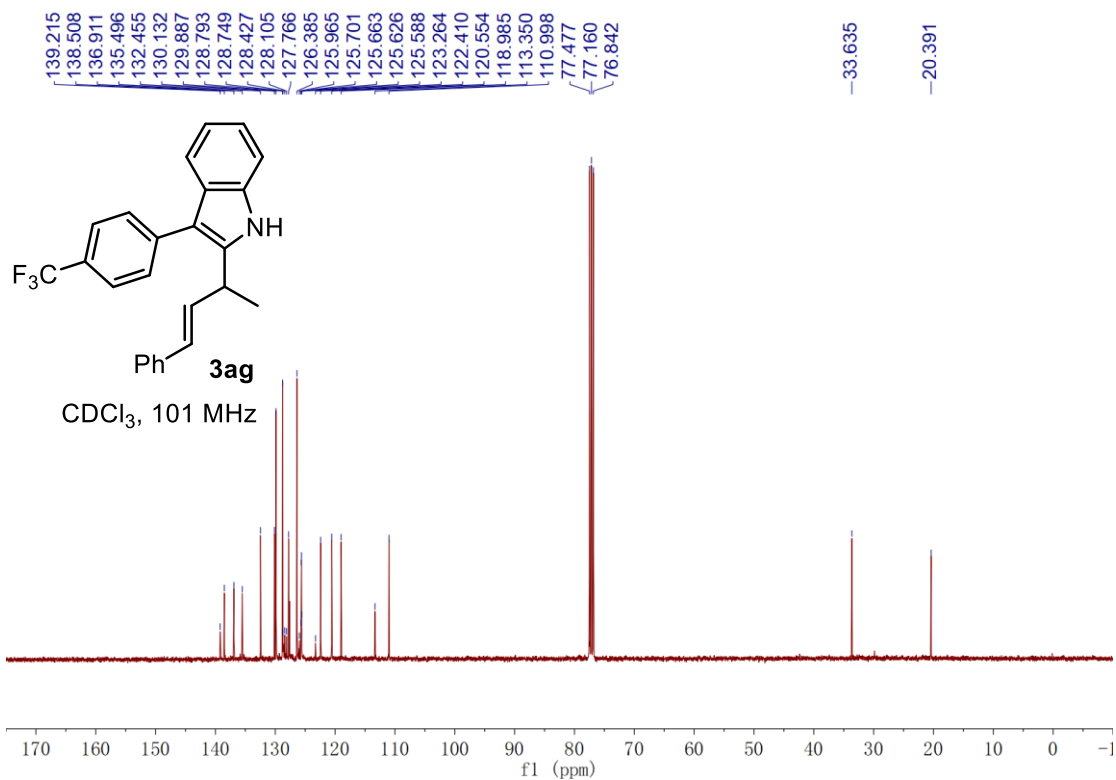

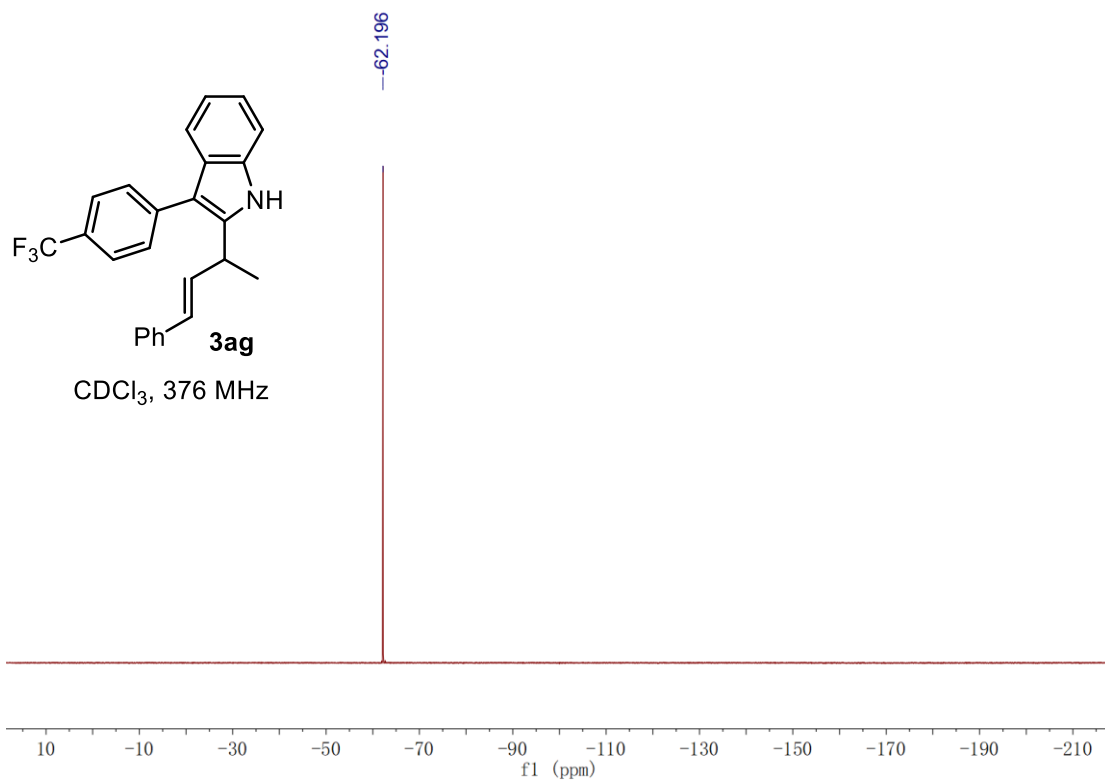

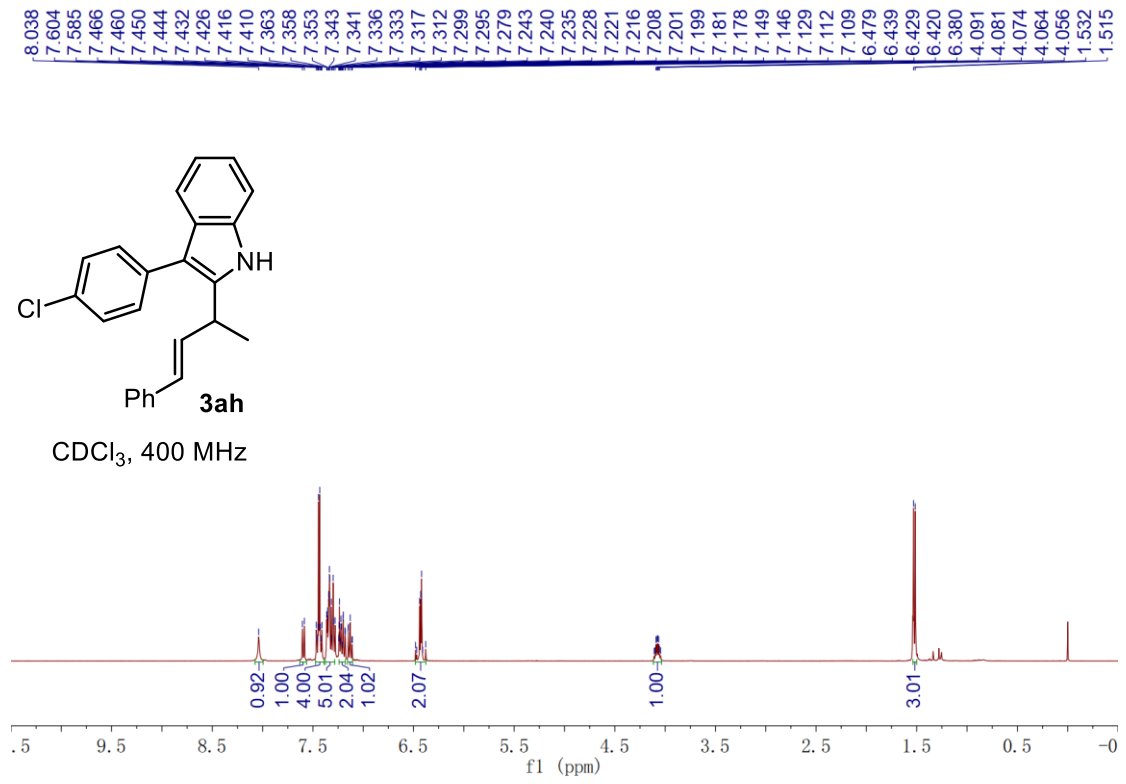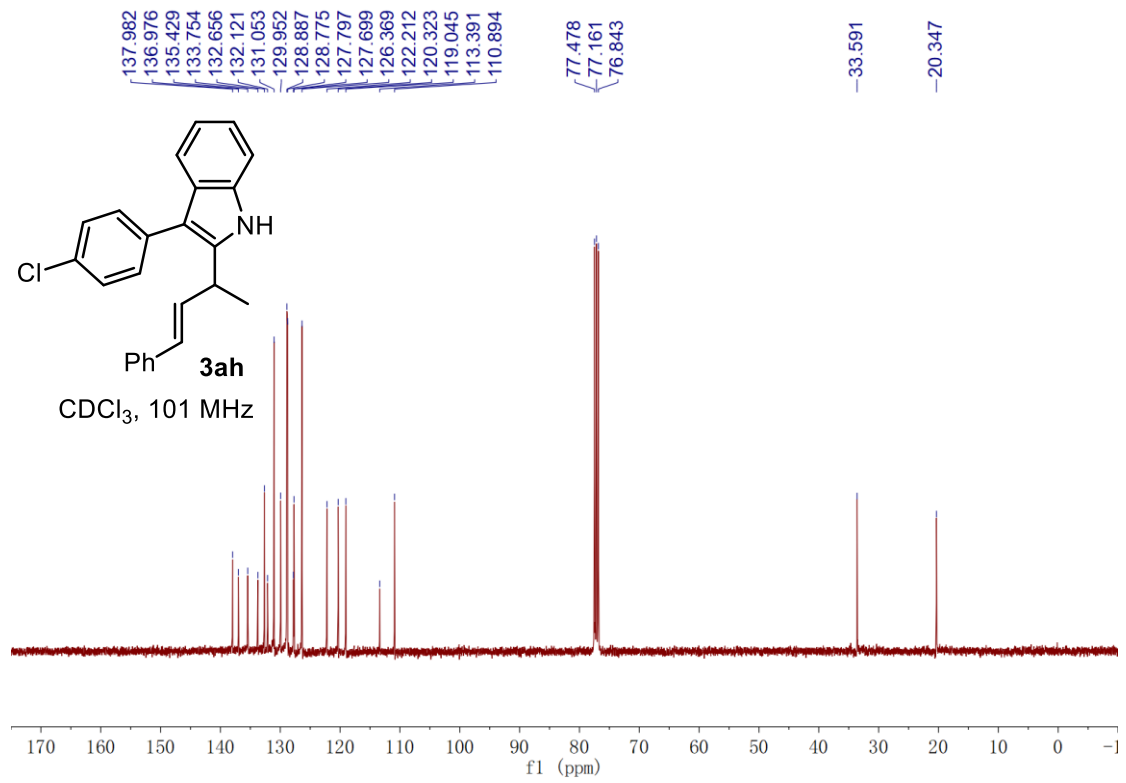

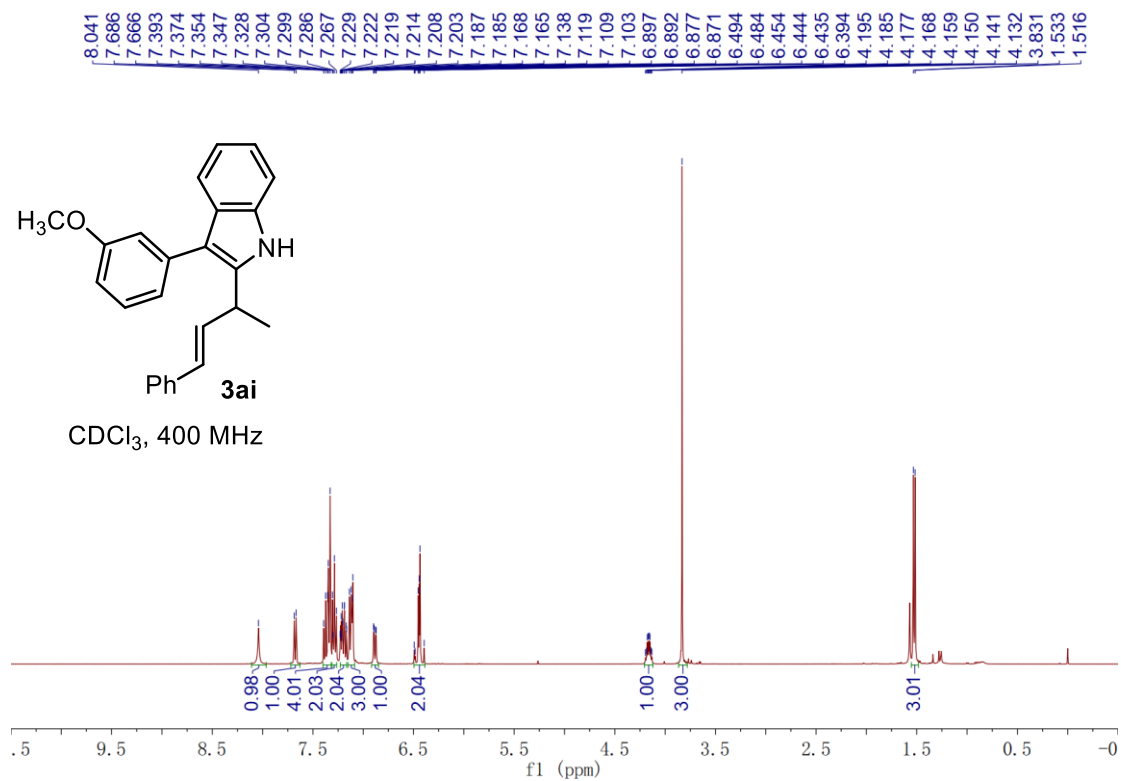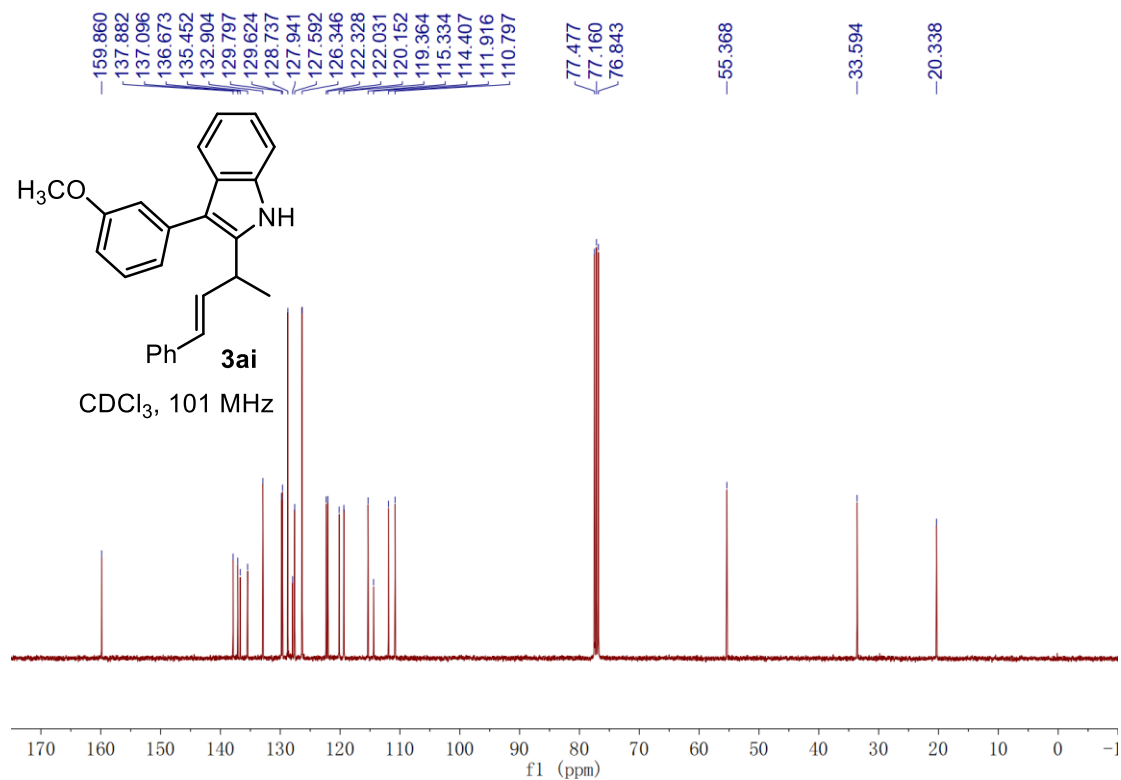

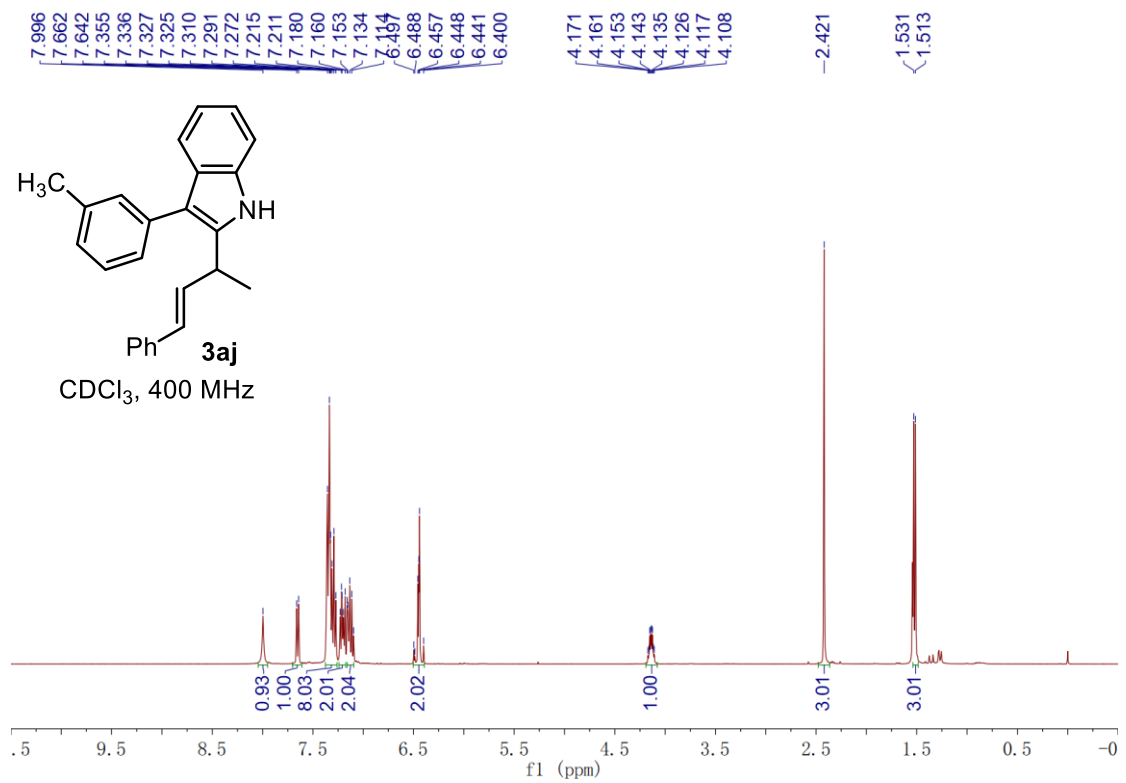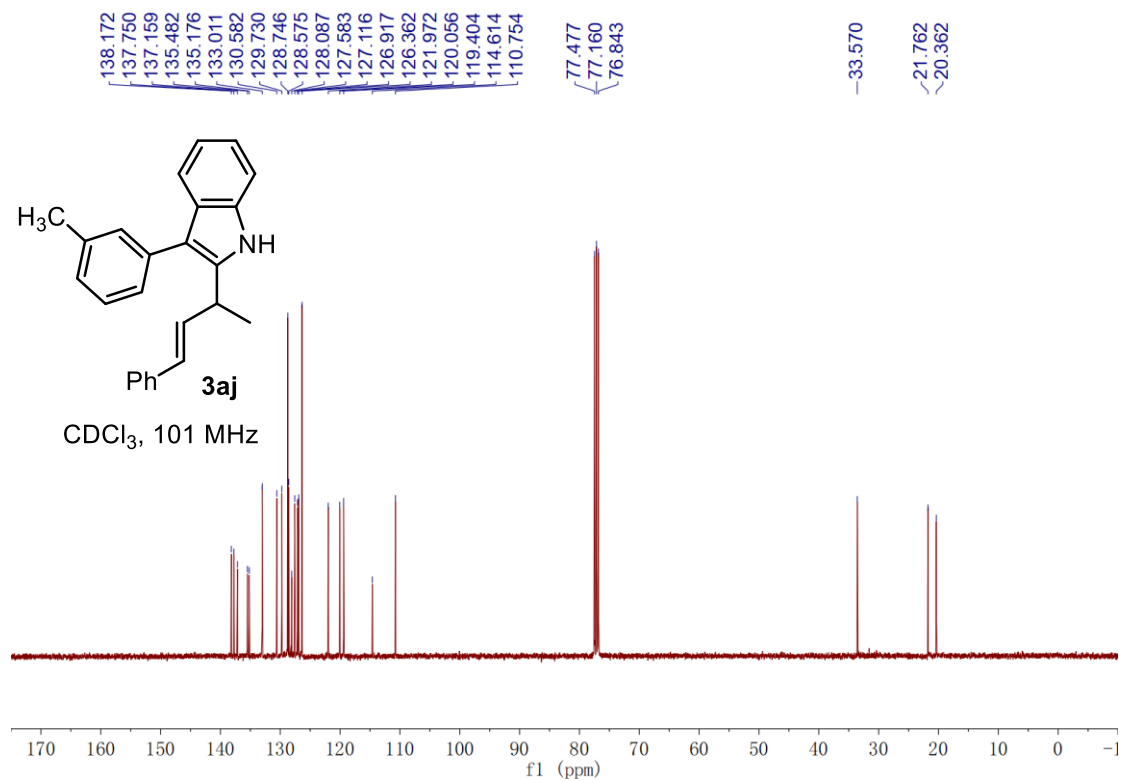

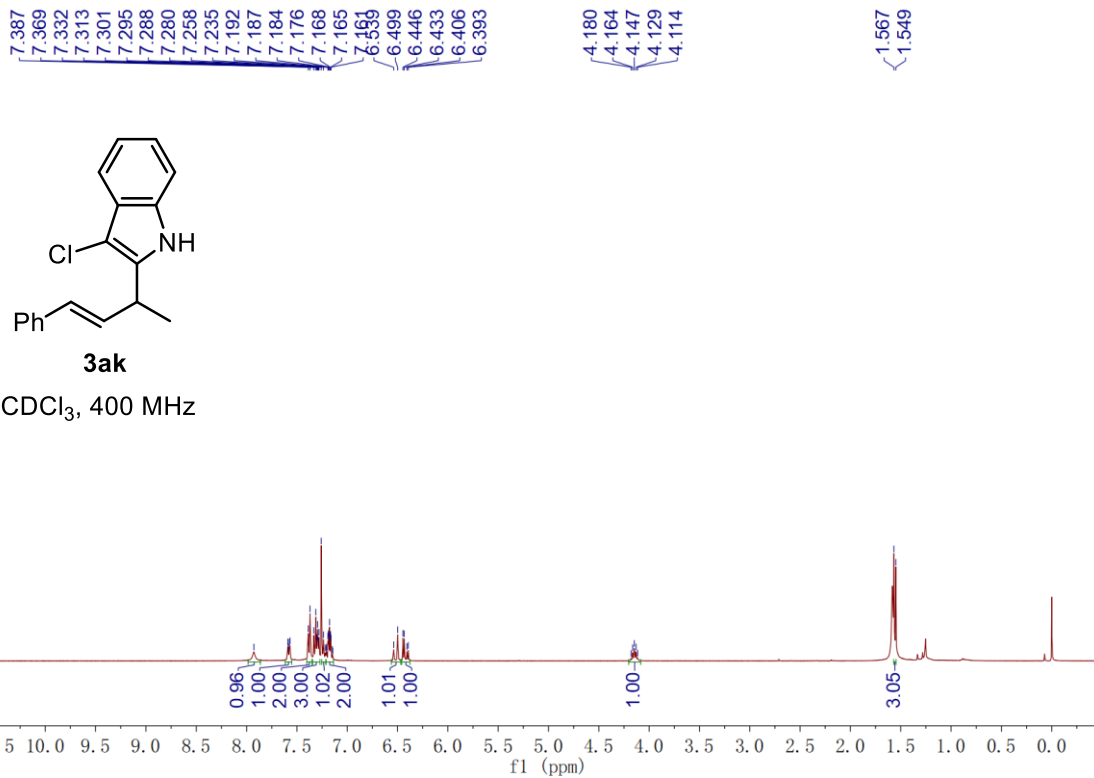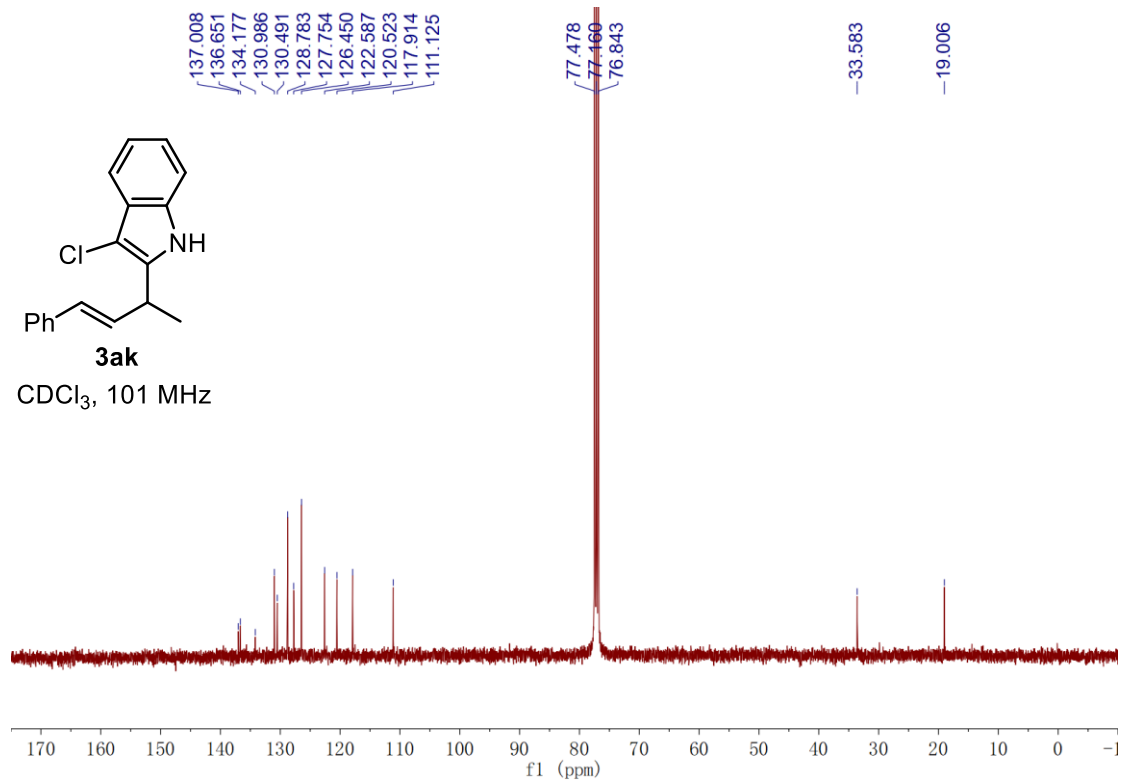

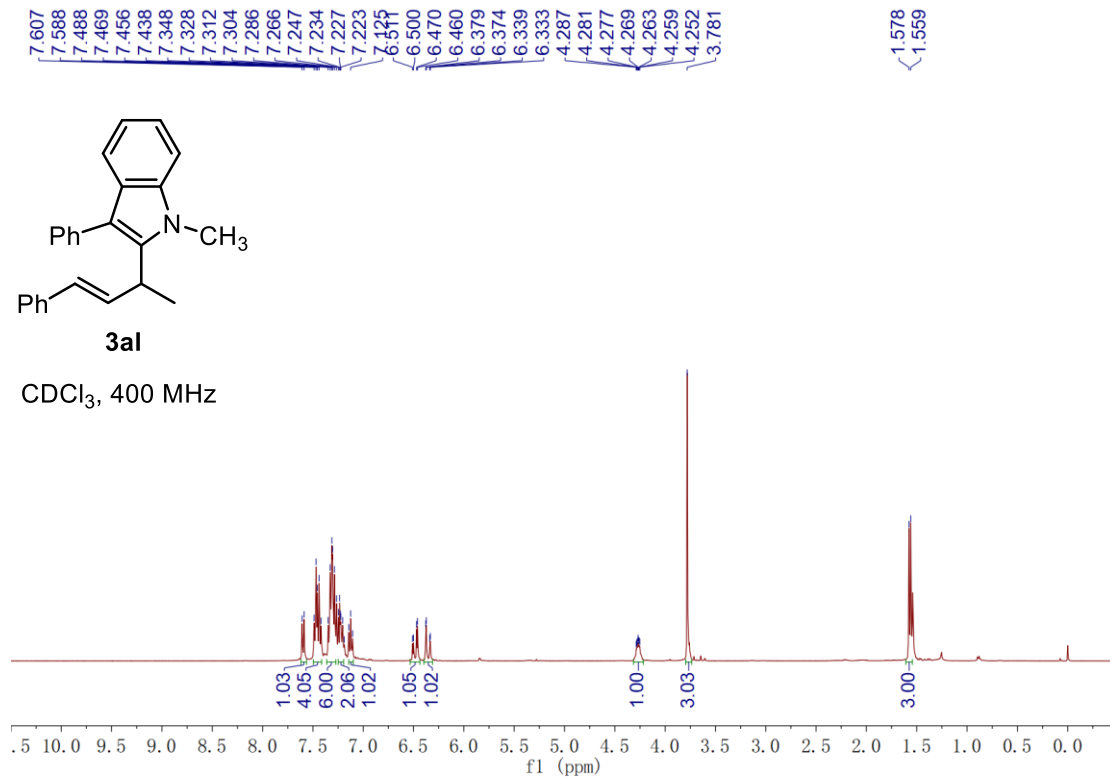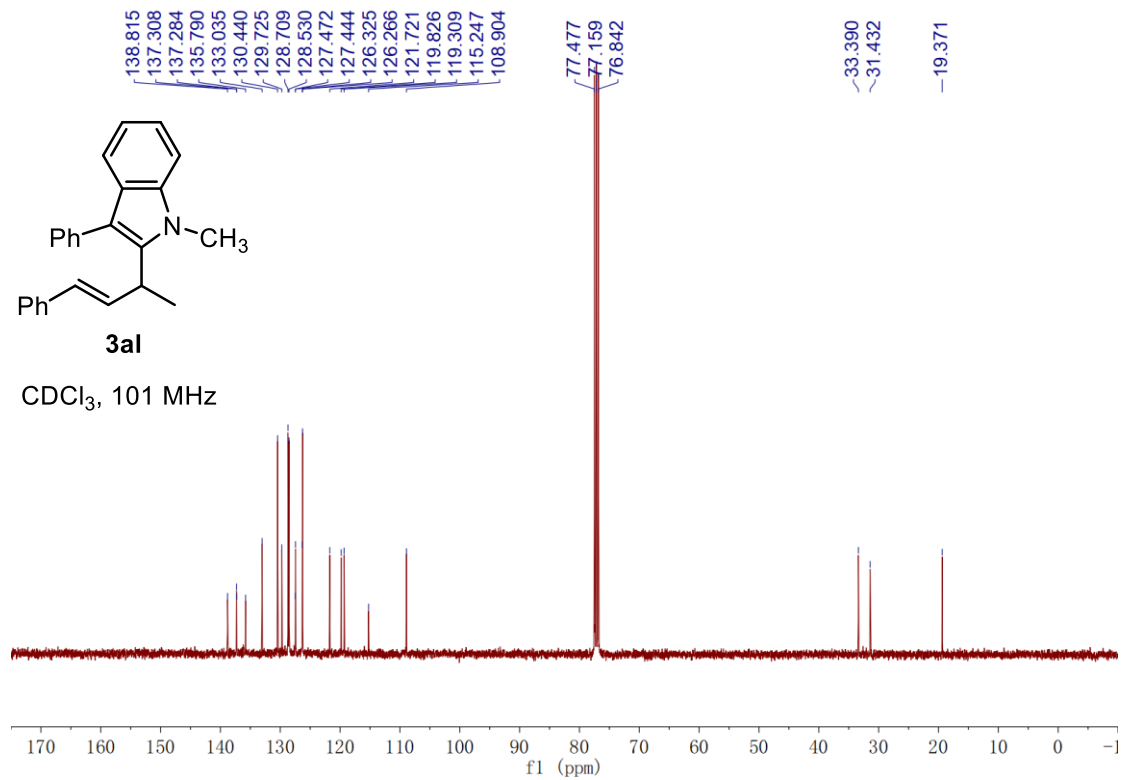

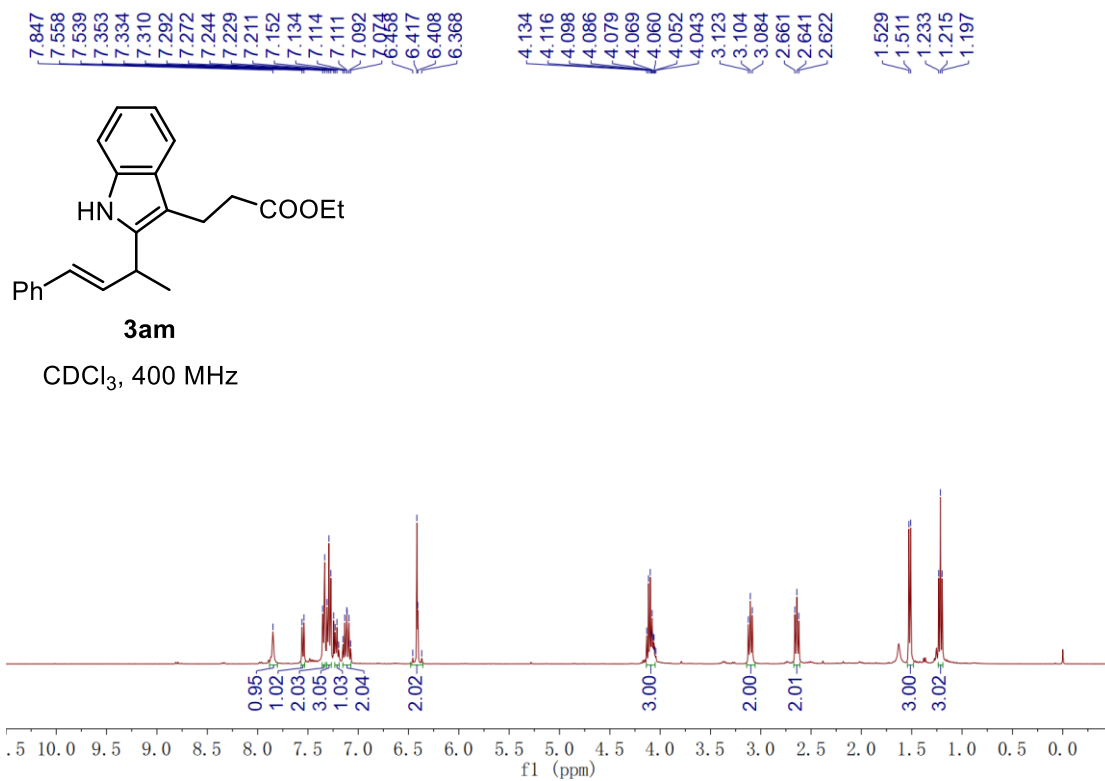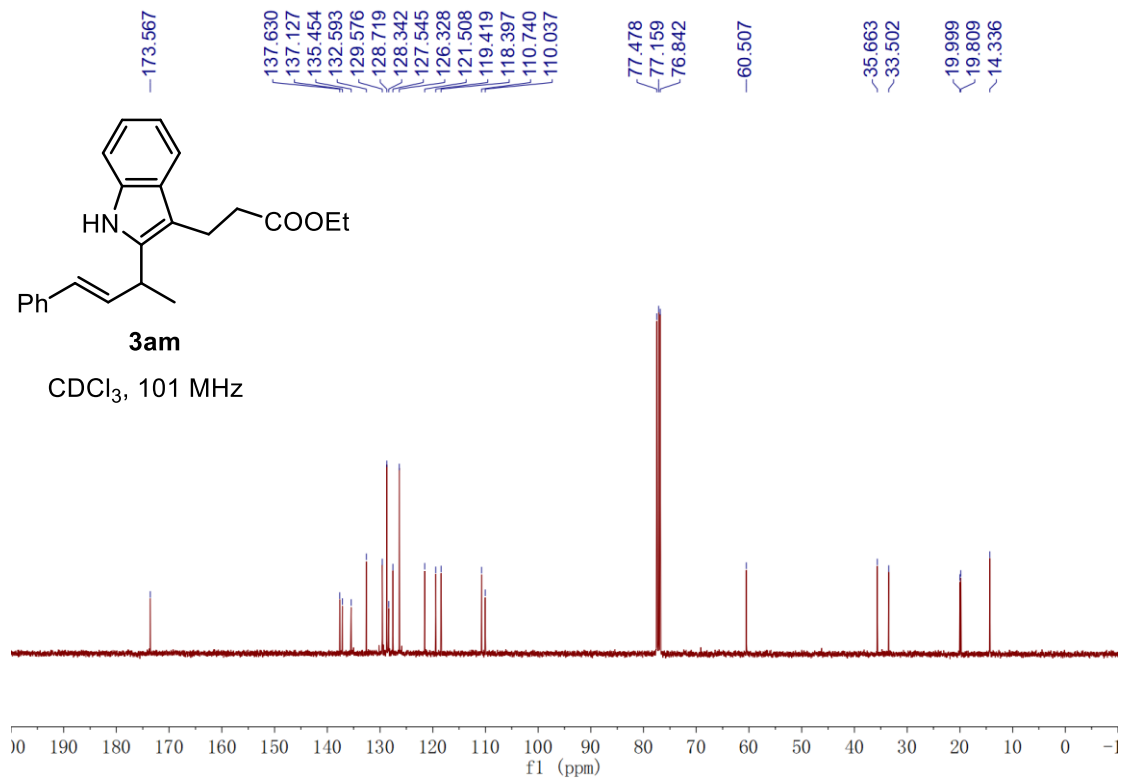

Supplement: d2qo01653b1.pdf [file d2qo01653b1.pdf]
